## Defining the Subcellular Distribution and Metabolic Channeling of Phosphatidylinositol

Joshua G. Pemberton<sup>1\*</sup>, Yeun Ju Kim<sup>1</sup>, Nivedita Sengupta<sup>1</sup>, Andrea Eisenreichova<sup>2</sup>, Daniel J. Toth<sup>1</sup>, Evzen Boura<sup>2</sup>, and Tamas Balla<sup>1</sup>.

<sup>1</sup>Section on Molecular Signal Transduction, Eunice Kennedy Shriver National Institute of Child Health and Human Development, National Institutes of Health, Bethesda, MD, USA.

<sup>2</sup>Institute of Organic Chemistry and Biochemistry, Czech Academy of Sciences, Prague, Czech Republic.

**Condensed Title:** Defining the Distribution and Turnover of PtdIns.

**Keywords:** phosphatidylinositol; polyphosphoinositides; membrane biology; phospholipid metabolism; lipid transport; signal transduction.

\*Author to whom all correspondence should be addressed at 35 Convent Drive, Bldg. 35a, Rm. 2D911, National Institutes of Health, Bethesda, MD, 20892-3572, United States of America; Phone: +1 (301) 402-5724; E-mail: [joshua.pemberton@nih.gov](mailto:joshua.pemberton@nih.gov).

1 **Summary**

2 Pemberton et al. characterize a molecular toolbox for the visualization and manipulation of  
3 phosphatidylinositol (PtdIns) within intact cells. Results using these approaches define the steady-state  
4 distribution of PtdIns across subcellular membrane compartments as well as provide new insights into the  
5 relationship between PtdIns availability and polyphosphoinositide turnover.  
6  
7

8 **Abstract**

9 Phosphatidylinositol (PtdIns) is an essential structural component of eukaryotic membranes that also  
10 serves as the common precursor for polyphosphoinositide (PPI<sub>n</sub>) lipids. Despite the recognized importance  
11 of PPI<sub>n</sub> species for signal transduction and membrane homeostasis, there is still a limited understanding of  
12 how the dynamic regulation of PtdIns synthesis and transport contributes to the turnover of PPI<sub>n</sub> pools. To  
13 address these shortcomings, we capitalized on the substrate selectivity of a bacterial enzyme, PtdIns-specific  
14 PLC, to establish a molecular toolbox for investigations of PtdIns distribution and availability within intact cells.  
15 In addition to its presence within the ER, our results reveal low steady-state levels of PtdIns within the plasma  
16 membrane (PM) and endosomes as well as a relative enrichment of PtdIns within the cytosolic leaflets of the  
17 Golgi complex, peroxisomes, and outer mitochondrial membranes. Kinetic studies also demonstrate the  
18 requirement for sustained PtdIns supply from the ER for the maintenance of monophosphorylated PPI<sub>n</sub>  
19 species within the PM, Golgi complex, and endosomal compartments.

## 1 Introduction

2 The dynamic remodeling of cellular membranes relies on molecular mechanisms that exploit the  
3 unique physiochemical properties of individual lipid species (van Meer et al., 2008; Holthuis and Menon, 2010).  
4 Additionally, the local lipid composition, in concert with integral and peripheral proteins, effectively defines  
5 membrane characteristics such as fluidity, thickness, and surface charge (Bigay and Antonny, 2012; Drin,  
6 2014; Barelli and Antonny, 2016; Jackson et al., 2016). The ability to maintain specific membrane  
7 compartments with distinct protein and lipid compositions directly facilitates the spatial organization of  
8 metabolic functions that underlie cellular homeostasis. Our current understanding of membrane composition  
9 has benefitted greatly from biomolecular separation techniques such as high-performance thin-layer  
10 chromatography, as well as, more recently, though the establishment of comprehensive lipidomics  
11 methodologies (Shevchenko and Simons, 2010; Wenk, 2010; Harkewicz and Dennis 2011; Tumanov and  
12 Kamphorst, 2017). However, these approaches lack spatial information related to how lipid species are  
13 distributed or transported throughout the membrane compartments that exist within an intact cell. While  
14 subcellular fractionation studies have provided the first detailed information regarding the lipid composition of  
15 specific organelles (van Meer and de Kroon, 2011; Klose et al., 2013; Brügger, 2014), it is becoming  
16 increasingly evident that even the most efficient isolation methods cannot work quickly enough to preserve  
17 the lipid composition of cellular membranes and also suffer from the unavoidable cross-contamination of  
18 organelles (van Meer, 2005; Satori et al., 2013; Kappler et al., 2016). Outside of these *in vitro* biochemical  
19 studies, imaging breakthroughs using endogenous membrane-binding protein domains have allowed for the  
20 visualization of embedded lipid species with high spatial and temporal resolution in live cells (Varnai et al.,  
21 2017; Wills et al., 2018). The refinement and rational design of lipid biosensors has been aided by detailed  
22 structural and biophysical studies that have established sequence features that directly contribute to the  
23 specificity and affinity of peripheral membrane-binding protein domains based on the recognition of general  
24 membrane features as well as individual lipid components (Lee, 2003; Cho and Stahelin, 2005; Pogozeva et  
25 al., 2013; Whited and Johs, 2015; Pasenkiewicz-Gierula et al., 2016). Despite these progresses, imaging  
26 applications are currently limited to only a few classes of lipids and have been predominantly focused on lipids  
27 involved in cellular signaling. Visualization or manipulation of structural lipids that form the bulk of eukaryotic  
28 membranes is still to be accomplished. In particular, among the core structural lipids, phosphatidylinositol  
29 (PtdIns) is unique in that it also serves as the precursor for all polyphosphoinositides (PPI<sub>n</sub>), which are known  
30 to directly control important aspects of membrane trafficking and cellular metabolism (Balla, 2013).

31 PtdIns synthesis occurs through the conjugation of *myo*-inositol to a cytidine diphosphate (CDP)-  
32 activated diacylglycerol (DAG) backbone and is dependent upon the activity of PtdIns synthase (PIS, also  
33 called CDIPT; Agranoff et al., 1958; Paulus and Kennedy, 1960; Tanaka et al., 1996). PIS is an integral  
34 membrane protein with undisputed activity associated with the ER (Williamson and Moore, 1976; Morris et al.,  
35 1990), although previous work from our group has also shown that, in mammalian cells, catalytically-active  
36 PIS, but not inactive mutants, is enriched within a mobile ER-derived sub-compartment that may function to

1 actively distribute PtdIns to subcellular membranes (Kim et al., 2011). Within specific membrane  
2 compartments, modification of PtdIns is tightly coordinated by substrate-selective kinases and phosphatases,  
3 whose integrated activity determines the local phosphorylation status of the *myo*-inositol headgroup at the 3-  
4 , 4-, and 5-positions to generate seven distinct PPIIn species: including mono-, bis-, and tris-phosphorylated  
5 PtdIns derivatives (Balla, 2013; Hsu and Mao, 2015; Burke, 2018). Individual PPIIn isomers localize to  
6 overlapping as well as distinct membrane compartments where they not only contribute to the assembly and  
7 initiation of signaling responses, but also function to maintain membrane identity (Hammond and Balla, 2015;  
8 Pemberton and Balla, 2018; Dickson and Hille, 2019). Due to the expansive cellular roles of PPIIn lipids, both  
9 as substrates for signaling enzymes and sites for protein-membrane interactions, it is not surprising that many  
10 human pathologies are caused by perturbations in PPIIn production or turnover (Pendaries et al., 2003;  
11 Wymann and Schneider, 2008; McCrea and De Camilli, 2009; Bunney and Katan, 2010; Dyson et al., 2012;  
12 Altan-Bonnet, 2017). The interest in PPIIn metabolism has resulted in significant efforts to validate selective  
13 biosensors to define the distribution and inter-conversion pathways that modulate localized PPIIn levels  
14 (Indevall-Hagren and De Camilli, 2014; Varnai et al., 2017; Wills et al., 2018). However, as the complex  
15 processes governing PPIIn metabolism must begin with PtdIns synthesis, investigations of PPIIn metabolism  
16 continue to be limited by the lack of understanding of how PtdIns production and transport are controlled. This  
17 is due in large part to the fact that mammalian proteins with enough specificity and affinity to be used as  
18 PtdIns-selective probes have yet to be identified. That said, Gram-positive bacteria produce virulence factors  
19 that directly target PtdIns in host membranes, including the ancestral homologs of the PLC superfamily. Unlike  
20 the canonical PLCs from higher vertebrates that use PtdIns(4,5)P<sub>2</sub> as a substrate and require Ca<sup>2+</sup> as a co-  
21 factor, the catalysis carried out by bacterial PtdIns-specific PLC (PI-PLC)s typically occurs independent of  
22 metal ions and these enzymes specifically hydrolyze PtdIns to generate lipid-soluble DAG and water-soluble  
23 inositol 1-phosphate (Bruzik and Tsai, 1994; Williams and Katan, 1996; Heinz et al., 1998). *In vivo*, most forms  
24 of bacterial PI-PLC work extracellularly by cleaving the headgroup from glycosyl-PtdIns (GPI) linkages that  
25 anchor GPI-targeted proteins to the outer leaflet of the plasma membrane (PM; Low and Saltiel, 1988;  
26 Ferguson and Williams, 1988; Sharom and Lehto, 2002); although intracellular functions of these enzymes  
27 have also been documented (Wadsworth and Goldfine, 1999; Wei et al., 2005; Poussin et al., 2009).  
28 Consequently, extensive structural and biochemical investigations of PI-PLCs were undertaken in hopes of  
29 generating strain-specific antibiotics or small molecules that could selectively target these secreted enzymes  
30 (Vinod et al., 1994; Martin and Wagman, 1996; Morris et al., 1996). Moreover, PI-PLCs were also recognized  
31 as ideal models for understanding how peripheral membrane proteins interact with membrane surfaces to  
32 carryout catalysis (Griffith and Ryan, 1999; Roberts et al., 2018). Collectively, these detailed *in vitro* analyses  
33 have provided a comprehensive description of the enzymatic activity and membrane-binding strategies utilized  
34 by PI-PLCs. These studies also highlighted the potential suitability of these enzymes as protein scaffolds for  
35 the design of PtdIns-selective molecular tools.

1           In the present study, we chose to revisit the utility of the well-studied and PtdIns-selective bacterial PI-  
2 PLCs for designing tools to visualize or manipulate PtdIns content in the membranes of intact cells. Using the  
3 structural descriptions available for PI-PLCs, we selected the highly active enzyme from *Bacillus cereus*  
4 (Kuppe et al., 1989; Volwerk et al., 1989) to use as a platform for protein engineering. Importantly, the *Bacillus*  
5 *cereus* (*Bc*)PI-PLC shows remarkable specificity for PtdIns and does not recognize or show catalytic activity  
6 towards phosphorylated PPIIn species or other common phospholipids (Ikezawa and Taguchi, 1981). In fact,  
7 the substrate selectivity of the *Bacillus* PI-PLCs even extends to the physicochemistry of the inositol ring,  
8 where the *myo* stereoisomer of inositol is preferentially hydrolyzed and the naturally occurring 1D configuration  
9 of the esterified headgroup is an absolute requirement for catalysis (Leigh et al., 1992; Lewis et al., 1993;  
10 Bruzik et al., 1994). Just as importantly, variations to the glycerol backbone and fatty acyl chains are well  
11 tolerated by the *Bc*PI-PLC (Guther et al., 1994). Capitalizing on these features, our general strategy was two-  
12 fold: first, we targeted residues within the conserved catalytic triad that would abolish enzymatic activity, but  
13 maintain substrate coordination within the active site in order to mark the intracellular distribution of PtdIns.  
14 Second, we generated *Bc*PI-PLC constructs with minimal interfacial binding, and therefore low basal catalytic  
15 activity from the cytosol. Such modified enzymes would still be capable of rapidly hydrolyzing PtdIns when  
16 recruited in the proximity of membrane-embedded substrate. Our results using catalytic mutants of the *Bc*PI-  
17 PLC suggest that PtdIns is localized to ER, the biochemically-defined site of PtdIns synthesis, but is also  
18 enriched in the cytosolic leaflets of the Golgi complex, peroxisomes, and mitochondria. Strikingly, we did not  
19 observe significant localization of the *Bc*PI-PLC variants within the PM or to endosomal compartments in any  
20 of the mammalian cell types examined. The membrane distribution of PtdIns was further investigated using  
21 recruitable versions of the modified *Bc*PI-PLC using organelle-targeted anchors and a chemically-inducible  
22 protein heterodimerization system. These enzyme recruitment studies show the rapid and localized production  
23 of DAG, the direct cleavage product of PtdIns hydrolysis, on the ER, mitochondria, peroxisome, and Golgi  
24 complex; as well as, to a lesser extent in Rab5- and Rab7-positive endosomes, but not within the PM.  
25 Importantly, this alternative strategy using *Bc*PI-PLC-mediated DAG production as an indirect proxy of PtdIns  
26 membrane contents confirmed the PtdIns distributions mapped by the *Bc*PI-PLC-based localization probe.  
27 Lastly, we also developed bioluminescence energy-transfer (BRET)-based biosensors to monitor organelle-  
28 specific PtdIns, DAG, and PPIIn dynamics at the level of cell populations and combined this method with the  
29 use of the recruitable *Bc*PI-PLC construct to characterize the role of PtdIns availability and supply for the  
30 generation of PPIIn species within distinct membrane compartments of live cells. These studies reveal the  
31 explicit need for the sustained delivery of PtdIns from the ER, rather than the absolute steady-state content of  
32 PtdIns, for the maintenance of monophosphorylated PPIIn species within the PM, Golgi complex, and  
33 endosomal compartments. Overall, our findings support an important role for PtdIns transfer and substrate  
34 channeling in the spatial control of PPIIn metabolism.

## 1 Results

### 2 Visualizing the membrane distribution of PtdIns using the PI-PLC scaffold.

3 Unlike the low-abundance PPIIn lipids, the intracellular distribution of PtdIns has never been observed  
4 in live cells. Here, we devised a strategy to visualize the steady-state distributions of PtdIns that capitalizes  
5 on the substrate selectivity and high specific activity of bacterial PI-PLCs. PI-PLCs are small monomeric  
6 proteins, roughly 300 amino acid residues in length, that consist of a single polypeptide with no disulfide bonds  
7 (Griffith et al., 1991); features that make them ideally suited to use as a template for developing an imaging  
8 probe or engineered enzyme. Despite clear effects on cellular DAG and PPIIn distributions, our previous  
9 studies expressing the PI-PLC from *Listeria monocytogenes* failed to show any membrane localization of the  
10 enzyme; presumably because of insufficient binding affinity (Fig.1A; Kim et al., 2011). Therefore, we have  
11 turned to another PI-PLC isozyme from *Bacillus cereus* that shows enhanced catalytic activity *in vitro* (Gandhi  
12 et al., 1993; Bruzik and Tsai, 1994) and, based on the available crystal structures (Heinz et al., 1995; Heinz  
13 et al., 1996; Moser et al., 1997), possesses a more defined pocket for accommodating the inositol head group  
14 as well as protruding hydrophobic elaborations present at the membrane-binding interface (Fig.1A; highlighted  
15 in yellow). Briefly, the gene sequence for the *BcPI-PLC* (residues 32-329) was codon-optimized and prepared  
16 by custom synthesis within a standard plasmid shuttle before sub-cloning into mammalian expression vectors  
17 as a fusion to the C-terminus of EGFP. In all instances, the N-terminal hydrophobic signal sequence (residues  
18 1-31) was removed to prevent targeting of the *BcPI-PLCs* into the secretory pathway. Expression of the GFP-  
19 *BcPI-PLC* in mammalian cells was extremely cytotoxic, with only small necrotic cells remaining 16-20 h post-  
20 transfection (Fig.1A). Mutagenesis studies targeting residues within the active site, including the conserved  
21 catalytic triad, were used to inactivate the GFP-*BcPI-PLC* in hopes of revealing any associations with  
22 subcellular membranes. Early studies of *BcPI-PLC* enzymology identified His32 as the general base that is  
23 responsible for abstracting the hydrogen from the C2 hydroxyl on the inositol ring (Fig.1B; Gässler et al., 1997;  
24 Hondal et al., 1998). Swapping His32 for alanine (H32A) eliminated the clear cytotoxicity associated with the  
25 fully-active *BcPI-PLC*; suggesting that this mutation effectively prevents *BcPI-PLC* catalysis (Fig.1C).  
26 Importantly, expression of the GFP-*BcPI-PLC*<sup>H32A</sup> also revealed a weak association with intracellular  
27 membranes, which could reflect the site of enzymatic activity and therefore substrate availability. In an attempt  
28 to enhance the relative affinity of this probe, we targeted a second histidine, His82, which also plays a central  
29 role in the catalytic mechanism as part of core catalytic triad, but does not directly form hydrogen-bonds with  
30 the inositol headgroup (Fig.1B; Gässler et al., 1997; Hondal et al., 1998). Targeting this residue would seem  
31 to not only abolish catalytic activity (Gässler et al., 1997), but would also maintain the relative affinity of the  
32 active site for PtdIns by preserving all of the residues responsible for coordination of the bound substrate. In  
33 line with this idea, relative to the GFP-*BcPI-PLC*<sup>H32A</sup>, we observed a clear increase in the membrane  
34 association of the putative GFP-*BcPI-PLC*<sup>H82A</sup> substrate trap, as evidenced from the limited fraction of the  
35 signal present within the cytosol (Fig.1D). Importantly, structural analysis of the resulting *BcPI-PLC*<sup>H82A</sup> variant  
36 using X-ray crystallography showed no alterations to the overall architecture of the active site or any gross

1 changes to either the protein stability or membrane-binding interface (Fig.S1). Detailed co-localization studies  
2 using GFP-*BcPI-PLC*<sup>H82A</sup> are presented in more detail as part of the subsequent sections, but, generally, we  
3 observed specific association of the probe with the ER (Fig.3A), as well as marked enrichments in the  
4 mitochondria (Fig.4A), peroxisomes (Fig.5A and 5B), and Golgi complex (Fig.6A and 6B). Strikingly, the GFP-  
5 *BcPI-PLC*<sup>H82A</sup> probe did not localize to the PM (Fig.8A) or to various endosomal compartments (Fig.10A and  
6 10D). The steady-state membrane distribution of GFP-*BcPI-PLC*<sup>H82A</sup> was consistent across representative  
7 mammalian cell lines, including the COS-7, HEK293, and HT-1080 lineages (Fig.S2). To further validate these  
8 localization studies, we looked to establish a novel heterodimerization system using the active *BcPI-PLC* for  
9 the rapid hydrolysis of PtdIns at precise locations throughout the endomembrane system in live cells.

### 11 **Acute Manipulation of PtdIns in defined membrane compartments.**

12 To investigate the effects of spatially restricted PtdIns hydrolysis in specific membrane compartments,  
13 we took advantage of the chemically-inducible protein heterodimerization system that uses rapamycin-  
14 dependent association of FK506-binding protein (FKBP) with the FKBP-rapamycin binding (FRB) domain from  
15 mammalian target of rapamycin (Choi et al., 1996; Liang et al., 1999). This system was exploited to recruit a  
16 modified, but catalytically-active, FKBP-*BcPI-PLC* to specific organelle membranes marked with FRB-  
17 conjugated targeting proteins (Belshaw et al., 1996; Komatsu et al., 2010). This approach has been  
18 successfully applied for other lipid-modifying enzymes (Varnai et al., 2006; Fili et al., 2006; Suh et al., 2006;  
19 Heo et al., 2006; Szentpetery et al., 2010; Hammond et al., 2012) and using them in concert with the *BcPI-PLC*  
20 would provide a powerful new strategy to map the membrane distributions of PtdIns. Importantly, our  
21 previous effort to generate a recruitable PI-PLC construct using the *Listeria monocytogenes* enzyme (Kim et  
22 al., 2011) did not yield a generally useful tool in our hands. Briefly, poor membrane recruitment combined with  
23 the relatively limited catalytic activity of the *Listeria* PI-PLC enzyme were quickly identified as the main reasons  
24 for its limited utility. Therefore, we again turned to the *BcPI-PLC* and wanted to generate mutants with reduced  
25 membrane-binding to decrease their background hydrolysis of PtdIns from the cytosol. Recruiting these  
26 enzyme variants to target membranes, in close proximity to PtdIns, with the rapamycin-inducible  
27 heterodimerization system would be useful as an alternative strategy to map PtdIns distributions in intact cells.

28 With these goals in mind, we examined the *BcPI-PLC* crystal structure, as well as the existing *in vitro*  
29 binding studies, to find any exposed hydrophobic or charged residues on the membrane-oriented surface of  
30 the enzyme that were likely to contribute to interfacial binding. We identified two membrane-oriented  
31 tryptophan residues, namely Trp47 within helix B and Trp242 in the extended  $\alpha 7$ - $\beta G$  loop (Figure 2a), facing  
32 which have already been shown to facilitate the association of *Bacillus* PI-PLCs with phospholipid vesicles  
33 (Feng et al., 2002; Guo et al., 2008; Khan et al., 2016). Aromatic or hydrophobic side chains, and tryptophan  
34 residues in particular, are known to reinforce the membrane attachment of peripheral proteins by directly  
35 penetrating into the hydrocarbon core of the bilayer (Yau et al., 1998; Lomize et al., 2007; Fuglebakk and  
36 Reuter, 2018). Given the importance of membrane-binding events for access to lipid substrates, the catalytic

1 activity of many phospholipase families display marked interfacial activation and the *Bacillus* PI-PLCs,  
2 specifically, exhibit a substantial preference for substrates presented within an interface rather than as  
3 monomers in solution (Lewis et al., 1993; Zhou et al., 1997a,b; Qian et al., 1998). Expression of *BcPI-PLC*  
4 with point mutations of either Trp47 (W47A) or Trp242 (W242A) already failed to strongly interact with  
5 subcellular membranes and were almost completely cytosolic; but, even without strong membrane  
6 association, the cells expressing either of these constructs still suffered from marked cytotoxicity (Fig.2A).  
7 However, mutagenesis of both Trp47 and Trp242 (W47A/W242A) prevented the membrane binding of the  
8 *BcPI-PLC* and also mitigated the cytotoxicity (Fig.2A). Now cytosolic, we could tag the *BcPI-PLC*<sup>W47A/W242A</sup>  
9 mutant with the FKBP dimerization module to create a chimeric enzyme construct (FKBP-*BcPI-PLC*<sup>AA</sup>) that  
10 could be rapidly recruited to distinct organelle membranes with high spatial and temporal resolution (Fig.S3A).  
11 Importantly, relative to the inactive FKBP-*BcPI-PLC*<sup>AA</sup> H32A variant, we did not observe drastic alterations to  
12 the distribution of an established biosensor for the PtdIns hydrolytic product, DAG (GFP-PKDC1<sub>ab</sub>; Kim et al.,  
13 2011), in cells with low to moderate expression of FKBP-*BcPI-PLC*<sup>AA</sup> (Fig.2B and 2C); supporting the  
14 conclusion that interfacial mutations of the *BcPI-PLC* effectively reduced the catalytic activity of this enzymes  
15 from the cytosol. However, we noted that cells expressing high levels of the FKBP-*BcPI-PLC*<sup>AA</sup> also showed  
16 a reduced nuclear fraction as well as punctate endomembrane membrane localization of the high-affinity DAG  
17 probe, suggesting that this modified enzyme still retained some basal catalytic activity. Therefore, we decided  
18 to further modify the FKBP-*BcPI-PLC*<sup>AA</sup> backbone by using mutagenesis of the enzyme active site in an  
19 attempt to further limit enzymatic activity from the cytosol to optimize the dynamic range of the induced  
20 catalysis. After excluding mutations associated with excessive reductions in catalytic activity *in vitro* (Gässler  
21 et al., 1997), we chose residues with accessory roles related to substrate binding or coordination; specifically  
22 targeting Arg163 and Tyr200 (Fig.1B). However, in order to compare the relative activities of the recruitable  
23 *BcPI-PLC* variants and account for individual cell variability, we wanted to address the problem of detecting  
24 localized DAG content, the lipid product associated with their activity, at the level of entire cell populations.  
25 For this, we worked to establish a semi-high throughput approach for the quantification of changes in  
26 subcellular membrane lipid compositions that complements the established single cell analyses that rely on  
27 confocal microscopy.

28

## 29 **BRET-based biosensors allow for population-level analyses of lipid dynamics within defined** 30 **membrane compartments using live cells**

31 To allow for comparative measurements of localized *BcPI-PLC* activity in whole populations of live  
32 cells, we created a series of BRET-based biosensors that measure localized DAG levels by monitoring the  
33 resonance energy transfer between a high-affinity DAG probe and organelle-specific membrane labels. This  
34 methodology relies on a single-plasmid design that incorporates the self-cleaving viral 2A peptide from *Thosea*  
35 *asigna* (T2A; Donnelly et al., 2001; Szymczak et al., 2004; Liu et al., 2017). The internal T2A site facilitates  
36 the split of the translated polypeptide into two proteins and allows for the uniform and roughly equimolar



1 expression of both the organelle-anchored BRET acceptor (mVenus) and Luciferase-tagged lipid-binding  
2 probe, which serves as the BRET donor (Varnai et al., 2017). Due to the prominent localization of the *BcPI*-  
3  $PLC^{H82A}$  probe within the outer mitochondrial membrane, we chose to validate the design of the BRET-based  
4 biosensors by attempting to monitor mitochondrial DAG levels. Briefly, the mitochondrial targeting sequence  
5 of AKAP (Csordás et al., 2010) was fused to mVenus, while sLuc was fused to the PKDC1<sub>ab</sub> probe to produce  
6 the compartment-selective mito-DAG<sup>BRET</sup> biosensor (AKAP-mVenus-T2A-sLuc-PKDC1<sub>ab</sub>). The mito-DAG<sup>BRET</sup>  
7 reporter was then used in combination with a mitochondria-targeted FRB construct (mito-FRB; AKAP-FRB-  
8 ECFP) and the cytosolic FKBP-*BcPI*- $PLC^{AA}$  enzyme variant to induce PtdIns hydrolysis on the surface of  
9 mitochondria. Importantly, to prevent artefacts from the enzyme recruitment, which could interfere with the  
10 energy transfer process, the chromophore of the ECFP (W66A; Heim et al., 1994) or mTagBFP2 (E215A;  
11 Subach et al., 2011) fluorescent proteins that are present within the membrane-targeting FRB constructs were  
12 disrupted by mutagenesis; while the FKBP-*BcPI*- $PLC^{AA}$  construct was tagged with the BRET-compatible  
13 label, iRFP. By changing either the membrane targeting motif or the lipid-binding reporter present within the  
14 vector backbone, we were able to create a variety of biosensors to monitor changes in various lipid species  
15 within specific membrane compartments of live cells.

16 Initial results using the FKBP-*BcPI*- $PLC^{AA}$  recruitment system with the mito-DAG<sup>BRET</sup> biosensor  
17 demonstrated the rapid production of DAG within the outer mitochondrial membrane following acute treatment  
18 with rapamycin (100 nM; Fig.S3B and S3C). Importantly, for these and all remaining studies, recruitment of  
19 an inactive enzyme variant, FKBP-*BcPI*- $PLC^{AA}$  H32A, was used as a transfection control and for the  
20 normalization of the BRET data. Overall, in establishing this experimental strategy, the acute production of  
21 DAG by the recruited FKBP-*BcPI*- $PLC^{AA}$  served as an indirect proxy of PtdIns availability within intact cell  
22 membranes and studies using this approach were then applied to other organelle membranes in order to  
23 validate the PtdIns distributions mapped using the *BcPI*- $PLC^{H82A}$  probe. In an attempt to enhance the dynamic  
24 range of the recruited enzyme construct, we generated additional mutations in the active site of the FKBP-  
25 *BcPI*- $PLC^{AA}$  scaffold to reduce its enzymatic activity. Relative to the parent FKBP-*BcPI*- $PLC^{AA}$  construct,  
26 alanine substitution or conservative mutagenesis of Arg163 (R163A and R163K; Fig.S3B) or Tyr200 (Y200A  
27 and Y200F; Fig.S3C) showed clear alterations in the kinetics of the DAG production observed after enzyme  
28 recruitment. The minor elevation of the basal mito-DAG<sup>BRET</sup> signals, which are not seen in the normalized  
29 curves (Fig. S3C), as well as the rapid initial peak in the DAG signal observed for the FKBP-*BcPI*- $PLC^{AA}$   
30 R163A, R163K, and Y200F variants suggested a minimized consumption and better preservation of the basal  
31 PtdIns levels by the mutant enzymes before membrane recruitment; features that established these enzyme  
32 variants as ideal candidates for further characterization. Subsequently, after examining the basal distributions  
33 of the DAG sensor (Fig.2D), as well as repeating the mitochondrial recruitment experiments using single-cell  
34 confocal microscopy, we chose the FKBP-*BcPI*- $PLC^{AA}$  R163A variant for the remaining studies due to the  
35 clear benefits of the enhanced signal to noise ratio for enzyme recruitment assays. Overall, these efforts using  
36 iterative mutagenesis have produced a series of FKBP-*BcPI*- $PLC^{AA}$  constructs with a range of catalytic

1 activities that can be selected for investigating diverse questions related to the availability and turnover of  
2 membrane PtdIns.

3

#### 4 **PtdIns is detected in the cytosolic membrane leaflets of the ER, mitochondria, and peroxisomes.**

5 The presence of the synthetic machinery responsible for PtdIns production, as well as the results from  
6 early membrane fractionation studies (Antonsson, 1997; Vance, 2015), suggested that PtdIns is likely to be  
7 an important component of ER membranes. Expression of the GFP-*BcPI-PLC<sup>H82A</sup>* probe with an ER- marker  
8 (mRFP-ER(Sac1<sub>1-38</sub>); Várnai et al., 2007) show clear co-localization within the ER tubules and the perinuclear  
9 region (COS-7 cells; Fig.3A). As a further proof of the presence of PtdIns within the ER membrane, we used  
10 FKBP-*BcPI-PLC<sup>AA</sup>* R163A and an ER-targeted FRB (FRB-ER; mTagBFP2-FRB-CyB5A<sub>tail</sub>) to acutely recruit  
11 the active enzyme to the surface of the ER. Local production of DAG within the cytosolic leaflet of the ER was  
12 measured using a novel ER-DAG<sup>BRET</sup> biosensor (sLuc-PKDC1<sub>ab</sub>-T2A-mVenus-CyB5A<sub>tail</sub>; Fig.3B and 3C).  
13 Recruitment of the FKBP-*BcPI-PLC<sup>AA</sup>* R163A resulted in the rapid accumulation of DAG within the ER, which  
14 was relatively short-lived and quickly returned to basal levels after roughly 30 min (Fig.3D). The transient  
15 nature of the DAG production observed is likely to reflect the active utilization of the DAG produced for other  
16 metabolic functions within the ER. In addition to labeling the tubular ER, the outer membrane of the  
17 mitochondria showed a clear enrichment of the *BcPI-PLC<sup>H82A</sup>* probe. In particular, although the mitochondrial  
18 localization of *BcPI-PLC<sup>H82A</sup>* could be seen when co-expressing fluorescent markers of the ER (Fig.4A), but  
19 was further enhanced using super-resolution imaging (Airyscan; Huff, 2015; Scipioni et al., 2018) and the  
20 luminal mitochondrial dye, MitoTracker (Chazotte, 2011; Fig.4B). These high-resolution images also highlight  
21 an apparent concentration of the *BcPI-PLC<sup>H82A</sup>* probe at the ER-mitochondria interface; including at contacts  
22 where the ER appears to wrap around the mitochondrial membrane (Fig.4A; white arrowhead). During these  
23 imaging studies, we also observed *BcPI-PLC<sup>H82A</sup>* localization to small rounded structures, often associated  
24 with the mitochondria or ER, that did not appear to be part of the Golgi complex or endosomal system. Co-  
25 expression of GFP-*BcPI-PLC<sup>H82A</sup>* with a fluorescently-tagged protein containing a peroxisomal targeting signal  
26 (mRFP-SKL; Kim et al., 2006) confirmed the identity of these membrane compartments as peroxisomes; with  
27 the *BcPI-PLC<sup>H82A</sup>* actually enveloping the lumenally-targeted fluorophore (Fig.5A and 5B; white arrowheads).  
28 In agreement with these localization data, rapamycin-dependent recruitment of FKBP-*BcPI-PLC<sup>AA</sup>* R163A  
29 caused a rapid and sustained increase of DAG within the outer mitochondrial membrane (mito-DAG<sup>BRET</sup>;  
30 Fig.4B and 4C) and peroxisomes (PEX-DAG<sup>BRET</sup>, PEX-mVenus-T2A-sLuc-PKDC1<sub>ab</sub>; Fig.5C and 5D). Given  
31 the mitochondrial enrichment based on the localization of the *BcPI-PLC<sup>H82A</sup>* probe, we looked for additional  
32 methods to evaluate the presence of PtdIns in the mitochondrial outer membrane. Specifically, recruitment of  
33 a truncated variant of a PtdIns 4-kinase (FKBP-PI4KA<sup>ΔN</sup>; Hammond et al., 2014) elicited the local production  
34 of PtdIns4P on the mitochondrial surface, as measured using a mito-PI4P<sup>BRET</sup> biosensor (AKAP-mVenus-T2A-  
35 sLuc-P4M<sub>SidM</sub><sup>X2</sup>; Fig.4D and 4E). Taken together, these data support the conclusion that PtdIns is localized  
36 within the outer mitochondrial membrane and accessible to cytosolic effectors.

1           Given the strong evidence for the specific enrichment of PtdIns within the outer mitochondrial  
2 membrane, we next used the recruitable FKBP-*BcPI-PLC<sup>AA</sup>* R163A enzyme to try and verify whether the  
3 membrane localization of the *BcPI-PLC<sup>H82A</sup>* probe responded to the hydrolysis of PtdIns on the surface of  
4 mitochondria. Surprisingly, recruitment of FKBP-*BcPI-PLC<sup>AA</sup>* R163A to the mitochondria caused a rapid  
5 increase in the association of *BcPI-PLC<sup>H82A</sup>* (mito-H82A<sup>BRET</sup>, AKAP-mVenus-T2A-sLuc-*BcPI-PLC<sup>H82A</sup>*) with the  
6 outer mitochondrial membrane. This initial increase, however, was followed by the steady elimination of the  
7 *BcPI-PLC<sup>H82A</sup>* probe from the surface of the mitochondria (Fig.4F and 4G). This redistribution could reflect an  
8 increased insertion of the probe into the membrane in response to the localized introduction of membrane  
9 packing defects. In fact, a recent biophysical study has shown that the catalytic activity of the *BcPI-PLC*  
10 is enhanced by the accumulation of the enzymatic product, DAG, which appears to function by locally decreasing  
11 membrane order to facilitate interfacial binding (Ahyayauch et al., 2015). Importantly, however, simple  
12 production of DAG is not sufficient to drive the membrane localization of the *BcPI-PLC<sup>H82A</sup>* probe (see below;  
13 Fig.9I). Taken together, these data highlight the metabolic availability of PtdIns within the outer mitochondrial  
14 membrane and, in carrying out these experiments, it did not escape our attention that acute hydrolysis of the  
15 mitochondrial PtdIns pool, as well as the associated local production of DAG, caused profound changes to  
16 the structure of the mitochondrial network. The ability to alter mitochondrial dynamics by initiating acute  
17 changes in membrane lipid composition represents an exciting application of these molecular tools that is  
18 being actively pursued in our laboratory.

19

## 20 **PtdIns is enriched in membranes of the Golgi complex and supports local PtdIns4P production.**

21           Along with the inner leaflet of the PM, the membranes of the Golgi complex show a significant  
22 enrichment with PtdIns4P, which is produced primarily by the type III PI 4-kinase (PI4K), PI4KB (Godi et al.,  
23 1999), with additional contributions from both type II PI4K enzymes, PI4K2A and PI4K2B (Wang et al., 2003;  
24 Weixel et al., 2005; Boura and Nencka, 2015). The production of PtdIns4P at the Golgi complex must be tightly  
25 regulated since it is an essential component of membrane trafficking systems (Wang et al., 2003; Godi et al.,  
26 2004) and also integrates with PPI<sub>n</sub>-dependent turnover throughout the endosomal system (Balla et al., 2002;  
27 Minogue et al., 2006; Dong et al., 2016; Baba et al., 2019). Co-localization of *BcPI-PLC<sup>H82A</sup>* with either the  
28 integral Golgi-localized membrane protein, Giantin, or the Arf1- and PtdIns4P-sensitive pleckstrin homology  
29 (PH) domain of FAPP1 (FAPP1<sub>PH</sub>; Levine and Munro, 2002; Szentpetery et al., 2010), showed clear overlap  
30 at the Golgi complex (Fig.6A and 6B). However, both markers also localized to peripheral areas of the  
31 perinuclear Golgi region that did not contain the *BcPI-PLC<sup>H82A</sup>* (Fig.6A and 6B, white arrowheads).  
32 Recruitment studies using FKBP-*BcPI-PLC<sup>AA</sup>* R163A and a Golgi-localized FRB-Giantin revealed a gradual  
33 and sustained increase of DAG (Golgi-DAG<sup>BRET</sup>, sLuc-PKDC1<sub>ab</sub>-T2A-mVenus-Giantin) after acute treatment  
34 with rapamycin that did not occur with the recruitment of the inactive control (FKBP-*BcPI-PLC<sup>AA</sup>* H32A; Fig.6C,  
35 6D, and 6E). The kinetics of the DAG increase did not have the same rapid onset as those observed in the  
36 ER, outer mitochondrial membrane, or peroxisomes. This could reflect the fact that, relative to the amount of

1 DAG produced by the recruited enzyme, the steady-state levels of DAG are already high in the Golgi complex  
2 (Litvak et al., 2005). Next, to examine the localized dynamics of PtdIns turnover and to verify that the *BcPI-*  
3 *PLC<sup>H82A</sup>* probe indeed reflects an enrichment of PtdIns at the Golgi complex, we monitored the localization of  
4 *GFP-BcPI-PLC<sup>H82A</sup>* at the Golgi after the recruitment of *FKBP-BcPI-PLC<sup>AA</sup>* variants either directly to the surface  
5 of the Golgi complex or to the ER. Direct recruitment of *FKBP-BcPI-PLC<sup>AA</sup>* or the R163A mutant to the Golgi  
6 had a highly variable effect on the localization of the *GFP-BcPI-PLC<sup>H82A</sup>* probe at the Golgi complex: many  
7 cells showed a gradual, but almost complete loss of Golgi-localized *GFP-BcPI-PLC<sup>H82A</sup>* when recruiting the  
8 more active *FKBP-BcPI-PLC<sup>AA</sup>* enzyme directly to the surface of the Golgi (Fig.7A and 7B). However, other  
9 cells showed an increased localization of *GFP-BcPI-PLC<sup>H82A</sup>* probe similar to what was observed in the  
10 mitochondria. Again, this effect could be related to the increase in local packing defects generated in the Golgi  
11 membranes, by acute hydrolysis of resident PtdIns. Overall, pooled averages from live-cell imaging  
12 experiments monitoring the Golgi-specific recruitment of the *FKBP-BcPI-PLC<sup>AA</sup>* variants showed a relative  
13 increase and no clear depletion of PtdIns based on the localization of the *GFP-BcPI-PLC<sup>H82A</sup>* probe (Fig.7A).  
14 The relative inability to rapidly deplete PtdIns levels at the Golgi complex likely reflects the larger size of the  
15 steady-state PtdIns pool within this compartment and also suggest an efficient supply of newly-synthesized  
16 PtdIns from the ER. In line with this latter hypothesis, the recruitment of either *FKBP-BcPI-PLC<sup>AA</sup>* or the R163A  
17 variant to the ER, rather than directly to the Golgi complex, resulted in a rapid loss of *GFP-BcPI-PLC<sup>H82A</sup>* from  
18 the Golgi region (Fig.7C and 7D). Taken together, these data reveal a high capacity for PtdIns transport from  
19 the ER to the Golgi complex for the maintenance of the steady state levels of PtdIns.

20 To examine how localized changes in PtdIns availability would affect the Golgi PtdIns4P levels, we  
21 recruited the *FKBP-BcPI-PLC<sup>AA</sup>* variants to the Golgi complex and monitored the localization of *FAPP1<sub>PH</sub>-*  
22 *GFP*. We observed that both direct recruitment of the *FKBP-BcPI-PLC<sup>AA</sup>*, as well as the R163A variant, either  
23 to the Golgi complex (Fig.7E and 7F) or to the ER (Fig.7G and 7H) significantly dropped the levels of *FAPP1<sub>PH</sub>-*  
24 *GFP* at the Golgi complex. These data suggest that PtdIns4P levels at the Golgi complex are sensitive to the  
25 local PtdIns content of the Golgi membranes, which is consistent with the relatively low affinity of PI4KB  
26 towards PtdIns (Downing et al., 1996; Zhao et al., 2000). Additionally, similar to the effects observed in the  
27 outer mitochondrial membrane using the BRET-based measurements, it is interesting that the Golgi-  
28 associated localization of both the *GFP-BcPI-PLC<sup>H82A</sup>* probe and *FAPP1<sub>PH</sub>-GFP* were selectively reduced by  
29 the recruitment of the inactive *FKBP-BcPI-PLC<sup>AA</sup> H32A* directly to the surface of the Golgi, but not to the ER  
30 (Fig.7A,7C, 7E, and 7G). This minor effect of the recruited inactive enzyme was attributed to the ability of the  
31 recruited *FKBP-BcPI-PLC<sup>AA</sup> H32A* enzyme to compete for binding of the *BcPI-PLC<sup>H82A</sup>* probe to the resident  
32 PtdIns and perhaps masking it from local effectors, including the PI4Ks.

33

#### 34 **The steady-state levels of PtdIns are low within the PM.**

35 Perhaps the most striking observation using the *GFP-BcPI-PLC<sup>H82A</sup>* construct as a PtdIns probe was  
36 the lack of significant localization to the PM (Fig.8A). Based on the well-documented importance and relative

1 enrichment of PPIIn lipids within the PM, this was unexpected as it has long been assumed from studies of red  
2 blood cell membranes (King et al., 1987) that there is a significant reserve pool of PtdIns within the PM.  
3 However, recent lipidomics analyses using advanced membrane isolation techniques have already questioned  
4 these assumptions by showing that the levels of PtdIns within enriched “PM lawns” were extremely low (Saheki  
5 et al., 2016). To further investigate this question, we recruited the FKBP-*BcPI-PLC<sup>AA</sup>* R163A to the PM and  
6 measured local DAG production. This analysis showed only a minor increase of DAG in the PM that was only  
7 detectable using the BRET-based approach (PM-DAG<sup>BRET</sup>, L<sub>10</sub>-mVenus-T2A-sLuc-PKDC1<sub>ab</sub>; Fig.8F).  
8 Furthermore, recruitment of a truncated FKBP-PI4KA<sup>ΔN</sup> to the PM, also failed to alter the PM levels of PtdIns4P  
9 (PM-PI4P<sup>BRET</sup>, L<sub>10</sub>-mVenus-T2A-sLuc-P4M<sub>SidM</sub><sup>x2</sup>; Fig.8B). These data are consistent with a low resting  
10 availability of PtdIns within the cytosolic leaflet of the PM. With this conclusion in mind, we sought to monitor  
11 the PM content of PtdIns in response to biochemical or pharmacological manipulations of PPIIn-modifying  
12 enzymes. First, we used an established enzymatic system to rapidly dephosphorylate PPIIn species within the  
13 PM and simultaneously monitored PtdIns levels. Acute PM recruitment of the engineered enzyme FKBP-  
14 Pseudojanin (Hammond et al., 2012), which possesses both 4- and 5-position PPIIn phosphatase activities,  
15 caused an acute increase of *BcPI-PLC<sup>H82A</sup>* levels within the PM (PM-H82A<sup>BRET</sup>, L<sub>10</sub>-mVenus-T2A-sLuc-*BcPI-*  
16 *PLC<sup>H82A</sup>*) relative to both the baseline and an inactive enzymatic control (FKBP-Pseudojanin<sup>DEAD</sup>; Fig.8C);  
17 although the latter still appeared to have some minor effect that could be related to residual 5-phosphatase  
18 activity that has been associated with the original Pseudojanin<sup>DEAD</sup> enzyme scaffold.

19 Next, we hypothesized that perhaps rapid conversion of PtdIns to PtdIns4P in the PM by PI4KA  
20 contributes to the low level of PtdIns that is maintained within the PM (Fig.8D). To test this, we used the  
21 selective PI4KA inhibitor, GSK-A1 (Bojjireddy et al., 2014), which gradually drops PM PtdIns4P levels.  
22 Treatment with GSK-A1 (100 nM) resulted in a gradual enrichment of *BcPI-PLC<sup>H82A</sup>* within the PM that was  
23 clearly apparent in almost all cells after 180 to 240 minutes (Fig.8D). To better address the kinetics of these  
24 changes, we repeated these experiment using the PM-H82A<sup>BRET</sup> biosensor and saw a rapid and dose-  
25 dependent increase of *BcPI-PLC<sup>H82A</sup>* in the PM after acute application of GSK-A1 (Fig.8E). To confirm these  
26 findings, we measured DAG production in response to recruitment of FKBP-*BcPI-PLC<sup>AA</sup>* R163A after a pre-  
27 incubation with GSK-A1. As discussed above, recruitment of the FKBP-*BcPI-PLC<sup>AA</sup>* R163A to the PM only  
28 evoked a minor increase in the PM level of DAG. In contrast, the same manipulation evoked a rapid and  
29 sizeable increase in DAG content within the PM following a 30 min pretreatment of cells with GSK-A1 (100  
30 nM; Fig.8F). These findings strongly support the conclusion that steady-state levels of PtdIns are low within  
31 the PM and provide evidence for the PM accumulation of PtdIns in response to the inhibition of PI4KA.

32

### 33 **ER-PM transport of PtdIns is directly channeled towards PPIIn production within the PM.**

34 Upon activation of selective classes of GPCRs or RTKs, mammalian PLCs cleave the polar head  
35 group of PtdIns(4,5)P<sub>2</sub> to produce two important intracellular second messengers: inositol 1,4,5-trisphosphate  
36 (Ins(1,4,5)P<sub>3</sub>) and DAG (Berridge and Irvine, 1984; Berridge, 2016). To maintain the supply of PtdIns(4,5)P<sub>2</sub>

1 and PtdIns4P within the PM during sustained receptor activation, PtdIns must be delivered and converted to  
2 PtdIns4P in the PM (Michell, 1975). The contribution of PtdIns delivery from the ER for the maintenance of  
3 PPIIn lipids is especially important if the resting level of PtdIns in the PM is indeed low. To determine the impact  
4 of acute PtdIns depletion on the turnover of PPIIn species, we monitored PtdIns4P (PM-PI4P<sup>BRET</sup>, L<sub>10</sub>-mVenus-  
5 T2A-sLuc-P4M<sup>SidM<sup>X2</sup></sup>; Tóth et al., 2016) or PtdIns(4,5)P<sub>2</sub> (PM-PI(4,5)P<sub>2</sub><sup>BRET</sup>, L<sub>10</sub>-mVenus-T2A-sLuc-PLCδ1<sup>PH</sup>;  
6 Tóth et al., 2016) levels within the PM after recruitment of FKBP-BcPI-PLC<sup>AA</sup> R163A to either the PM or  
7 indirectly to the ER. Direct recruitment of FKBP-BcPI-PLC<sup>AA</sup> R163A to the PM failed to alter the PM levels of  
8 either PtdIns4P or PtdIns(4,5)P<sub>2</sub>. In contrast, recruitment of FKBP-BcPI-PLC<sup>AA</sup> R163A to the ER selectively  
9 reduced PtdIns4P levels within the PM without altering PtdIns(4,5)P<sub>2</sub> levels (Fig.9A, 9B, 9C, and 9D). For  
10 comparison, treatments with GSK-A1 (100 nM), to inhibit PI4KA, or the activation of endogenous PLC activity  
11 using angiotensin-II (AngII; 100 nM) were used to achieve complete loss of PtdIns4P or PtdIns(4,5)P<sub>2</sub> from  
12 the PM, respectively (Fig.9A and 9D). Representative confocal images further support the selective reduction  
13 of PtdIns4P by ER recruitment of FKBP-BcPI-PLC<sup>AA</sup> R163A, as evidenced from the re-localization of the GFP-  
14 P4M<sup>SidM<sup>X2</sup></sup> probe into the cytosol and towards the substantial PtdIns4P pool at the Golgi complex (Fig.9C).  
15 Overall, these data highlight the tight relationship between PtdIns supply from the ER and PtdIns4P production  
16 at the PM and are also consistent with previous studies describing the dissociation of PtdIns4P and  
17 PtdIns(4,5)P<sub>2</sub> levels following genetic (Nakatsu et al., 2012; Alvarez-Prats et al., 2018) or pharmacological  
18 (Bojjireddy et al., 2014) ablation of PM-associated PI4KA activity. Lastly, we also wanted to examine the PM  
19 levels of the BcPI-PLC<sup>H82A</sup> probe in response to PLC-dependent consumption of PPIIn lipids (Balla et al., 1988).  
20 Quantified responses, measured using the PM-H82A<sup>BRET</sup> biosensor, show only minor changes in PM levels  
21 of BcPI-PLC<sup>H82A</sup> compared to the massive relative changes observed in both PtdIns4P and PtdIns(4,5)P<sub>2</sub> after  
22 GPCR-dependent PLC activation (Fig.9G). As shown in more detail with an expanded scale (Fig. 9H), PtdIns  
23 initially shows a slight increase, but soon declines slightly below its initial levels within the PM as PPIIn re-  
24 synthesis begins to take place. Lastly, representative images after stimulation with AngII (100 nM) show that  
25 despite a massive increase in the PM levels of DAG, accumulation of BcPI-PLC<sup>H82A</sup> is not observed within the  
26 PM (Fig.9I). This result clearly shows that without PtdIns present within the membrane, acute DAG production  
27 or changes to membrane packing, in isolation, are not sufficient to localize the BcPI-PLC<sup>H82A</sup> probe to the  
28 membrane.

### 29 30 **Endosomal PtdIns3P levels depend on PtdIns delivery from the ER.**

31 Apart from PtdIns4P and PtdIns(4,5)P<sub>2</sub>, monophosphorylated PtdIns3P comprises the largest  
32 remaining PPIIn pool at roughly 20-30% of the total membrane PtdIns4P content in higher eukaryotes (Sarkes  
33 and Rameh, 2010). PtdIns3P is found primarily in early endosomes (Gillooly et al., 2000) and autophagosomes  
34 (Funderburk et al., 2010), but the possible presence of PtdIns3P in membranes of the Golgi and ER has also  
35 been documented using membrane fractionation (Sarkes and Rameh, 2010). Within the endo-lysosomal  
36 system, PtdIns3P is produced primarily within early endosomes by the class III phosphoinositide 3-kinase

1 (Vps34) complex (Volinia et al., 1995) and plays a central role in the spatial control of endosomal fusion and  
2 cargo sorting (Schink et al., 2016). In particular, production of PtdIns3P within Rab5-associated endosomes  
3 plays a central role in the multistep mechanism that drives endosomal maturation by facilitating the membrane  
4 recruitment of protein machineries responsible for triggering the switch from a Rab5-GTP to Rab7-GTP  
5 membrane coat (Rink et al., 2005; Poteryaev et al., 2010). Similar to our efforts to understand the role of  
6 PtdIns delivery for PPI<sub>n</sub> synthesis within the Golgi complex and PM, we sought to define the relative  
7 contribution of local endosomal PtdIns content and ER-derived PtdIns synthesis for the maintenance of  
8 PtdIns3P within Rab5- and Rab7-positive endosomal compartments. Overexpression of wild-type Rab5  
9 (Fig.10A) or Rab7 (Fig.10D) shows minimal co-localization of these endosomal markers with the *BcPI-PLC<sup>H82A</sup>*  
10 probe; although intimate contacts between the ER and both the early as well as late endosomal compartments  
11 are apparent (Fig.10A and 10D, white arrowheads). Accordingly, rapamycin-dependent recruitment of FKBP-  
12 *BcPI-PLC<sup>AA</sup> R163A* showed a very minor increase in DAG production within Rab5-positive compartments  
13 (Rab5-DAG<sup>BRET</sup>, sLuc-PKDC1<sub>ab</sub>-T2A-mVenus-Rab5; Fig.10B). However, a significant increase in DAG levels  
14 were seen in Rab7-positive membranes (Rab7-DAG<sup>BRET</sup>, sLuc-PKDC1<sub>ab</sub>-T2A-mVenus-Rab7; Fig.10E). These  
15 data are consistent with a detectable amount of PtdIns within the Rab7-labelled endosomes and could also  
16 highlight a role for a continued supply of PtdIns to late endosomes as a result of an increase in the number of  
17 contacts with the ER that occurs during endosomal maturation (Friedman et al., 2013; Raiborg et al., 2015).  
18 To define the relative roles of PtdIns originating from the surface of endosomes and that transported from the  
19 ER for local PtdIns3P production, we monitored PtdIns3P levels within both Rab5- and Rab7-positive  
20 endosomes after directly recruiting FKBP-*BcPI-PLC<sup>AA</sup> R163A* to the surface of endosomes or indirectly to the  
21 ER. Similar to the other monophosphorylated PPI<sub>n</sub> pools, recruitment of FKBP-*BcPI-PLC<sup>AA</sup> R163A* to the ER  
22 significantly reduced PtdIns3P content in both the Rab5 (Rab5-PtdIns3P<sup>BRET</sup>, sLuc-FYVE<sub>Hrs</sub><sup>X2</sup>-T2A-mVenus-  
23 Rab5) and Rab7 (Rab7-PtdIns3P<sup>BRET</sup>, sLuc-FYVE<sub>Hrs</sub><sup>X2</sup>-T2A-mVenus-Rab7) compartments; whereas only  
24 minor reductions were observed following the direct recruitment of FKBP-*BcPI-PLC<sup>AA</sup> R163A* directly to the  
25 respective endosome populations (Fig.10C and 10F). As an important measure of both the selectivity and  
26 sensitivity of these BRET biosensors, treatment with a highly selective inhibitor of Vps34 (VPS34-IN1; Bago  
27 et al., 2014) significantly reduced the levels of PtdIns3P in both the Rab5- and Rab7-positive endosomes  
28 (Fig.10C and 10F). Not surprisingly, the severity of the drop in PtdIns3P content caused by direct inhibition of  
29 Vps34 activity exceeded the effects associated with recruitment of the FKBP-*BcPI-PLC<sup>AA</sup> R163A* and, based  
30 on the relative size of the responses, are consistent with the notion that the PtdIns3P levels are highest within  
31 the Rab5-labelled early endosomes. The rapid conversion of PtdIns and the increased PtdIns3P content in  
32 the early endosomes might help to explain the relatively low steady-state levels of PtdIns within the Rab5  
33 compartment.

## 1 Discussion

2           Within mammalian cell membranes, PtdIns represents roughly 10-15 mol% of total phospholipids  
3 (Vance, 2015), while the diverse PPIIn species only comprise an estimated 2-5% of the available PtdIns (Xu  
4 et al., 2003; Sarkes and Rameh, 2010). The relative abundance of PtdIns and its role as a precursor for PPIIn  
5 production, has led to the assumption that PtdIns is fairly abundant in membranes where the various PPIIn  
6 lipids exist. Early pioneering studies to visualize the subcellular distribution of PtdIns involved the synthesis of  
7 a fluorescent PtdIns analog and revealed accumulation of the tagged lipid within membranes corresponding  
8 to the ER, mitochondria, and perinuclear Golgi region (Uster and Pagano, 1986; Ting and Pagano, 1990).  
9 However, an examination of total lipid contents after the exogenous delivery of the labelled PtdIns suggested  
10 that conversion of the fluorescently-tagged PtdIns to DAG was required for observing the labeling of  
11 intracellular membranes (Ting and Pagano, 1990). The apparent hydrolysis of the labelled PtdIns was most  
12 prominent in Swiss 3T3 cells and led to the hypothesis that a cell-surface or secreted PI-PLC could be  
13 responsible for remodeling the exogenous PtdIns (Ting and Pagano, 1990). These unresolved discrepancies,  
14 as well as the need to incorporate the fluorescent label into the fatty acid side chains, question the reliability  
15 of these approaches for mapping the intracellular distribution of PtdIns. As a result, we looked for an alternative  
16 method for the visualization of intracellular PtdIns and eventually devised a protein-engineering platform that  
17 utilizes the substrate selectivity of the bacterial *BcPI-PLC* to complete comprehensive investigations of PtdIns  
18 distribution and availability in live cells.

19           Efforts to visualize membrane-embedded PtdIns involved the rational design of a *BcPI-PLC* variant,  
20 *BcPI-PLC<sup>H82A</sup>*, possessing a mutation within the active site that successfully removes catalytic activity without  
21 interfering with the coordination of the lipid substrate, PtdIns (Fig.S1). It is important to note that with this  
22 approach, the localization of the probe reports on the PtdIns abundance only at the cytoplasmic leaflet of  
23 organelle membranes. Our results using the engineered *BcPI-PLC<sup>H82A</sup>* probe suggest that the resting levels  
24 of PtdIns within the PM and endosomes are kept extremely low and, in addition to the site of PtdIns synthesis  
25 within the ER, we identify a relative enrichment of PtdIns in the membranes of the Golgi complex, peroxisomes,  
26 and mitochondria. This pattern of the PtdIns distributions is in general agreement with membrane fractionation  
27 studies that also define the ER and Golgi complex as containing the highest percentages of PtdIns (~9%)  
28 among organelle compartments; exceeding those associated with the endolysosomal system, nucleus, and  
29 PM (~4-7%; Vance, 2015). It is important to mention that these fractionation values refer to the sum of outer  
30 and inner leaflets of the respective membranes. However, while bulk measurements show PtdIns as a  
31 relatively minor component of mitochondrial membranes, estimated at ~5-7% of the total lipid contents,  
32 isolation of purified inner and outer membranes reveal an enrichment of PtdIns in the outer mitochondrial  
33 membrane (~9-13% total phospholipids) relative to the inner membrane (~2-5% total phospholipids; Ardail et  
34 al., 1990; de Kroon et al., 1997; Daum and Vance, 1997). Based on our current study, within the cytosolic  
35 leaflet, the mitochondria appear to possess a relative PtdIns content similar to that associated with bulk  
36 membranes of the ER and Golgi complex. Our findings that, when compared with the ER membrane, PtdIns



1 concentrations appear to be higher within the cytosolic leaflet of membranes forming the Golgi complex,  
2 peroxisomes, and mitochondria raises the questions of how these enrichments of PtdIns occur and whether  
3 these PtdIns sources serve an unrecognized function. Although the Golgi has a high PtdIns4P content that  
4 undergoes rapid turnover, this alone may not explain the high PtdIns levels, since the PM and endosomes  
5 also have high PPIIn levels and yet, limited amounts of PtdIns were detected in these membrane  
6 compartments. Interestingly, a series of studies have shown the important regulatory role of DAG in the control  
7 of Golgi functions (Baron and Malhotra, 2002; Bossard et al., 2007; Fernández-Ulibarri et al., 2007; Asp et al.,  
8 2009) and it has been suggested that activation of PLC enzymes, which are sensitive to Gβγ subunits,  
9 generate DAG from PPIIn species at the Golgi (Díaz Añel, 2007). Some of these studies also claim that the  
10 substrate used by the Golgi-resident PLC isoforms is PtdIns4P (Zhang et al., 2013; Sicart et al., 2015), but  
11 direct hydrolysis of PtdIns by some of the mammalian PLCs cannot be ruled out.

12 The physiological functions of PtdIns in the mitochondria and peroxisomes are even more intriguing  
13 given that enzymes directly using PtdIns as a substrate have not been described to function within, or interact  
14 with, the outer membrane of mitochondria. It is notable, though, that multiple proteomic screens have identified  
15 PI4K isoforms within mitochondria-enriched datasets (Schon, 2007; Calvo et al., 2016; Hung et al., 2017).  
16 Downstream of PtdIns, specific isoforms or alternatively-spliced variants of the PPIIn phosphatases  
17 synaptojanin 2 (Synj2A; Nemoto and De Camilli, 1999) and phosphatase and tensin homolog deleted on  
18 chromosome 10 (PTEN and PTENα; Bononi et al., 2013; Liang et al., 2014) have been shown to localize to  
19 the mitochondria, but, apart from scaffolding or allosteric functions, the explicit roles for their lipid phosphatase  
20 activities remains largely uncharacterized. The localization of these enzymes is also interesting given that,  
21 using the available probes, no PPIIn species has ever been detected on the outer surface of mitochondria and  
22 our efforts to find PPIIn lipids associated with the outer mitochondrial membrane have been unsuccessful. One  
23 functional study examining a role for PPIIn lipids within the mitochondria provided indirect evidence for  
24 PtdIns(4,5)P<sub>2</sub> as a local regulator of mitochondrial dynamics (Rosivatz and Woscholski, 2011). However, those  
25 studies relied on the ectopic overexpression of a mitochondrial-targeted PLCδ<sub>1PH</sub> domain, which could also  
26 function by altering inter-organelle contacts through protein-protein interactions or through localized buffering  
27 of Ins(1,4,5)P<sub>3</sub> levels to change ER-mitochondria associated Ca<sup>2+</sup> dynamics. Similar to the mitochondria, to  
28 date, few studies have looked at the content or functions of PtdIns and PPIIn derivatives in peroxisomes.  
29 Briefly, fractionation studies show that PtdIns represents ~5% of the total phospholipid content of the  
30 peroxisomes (Hardeman et al., 1990) as well as suggest, relative to other inositol-containing lipids, that the  
31 levels of PtdIns4P, PtdIns(3,5)P<sub>2</sub>, and PtdIns(4,5)P<sub>2</sub> are enriched in peroxisomal membranes (Jeynov et al.,  
32 2006). The potential for a specific enrichment of PPIIn lipids is supported by recent reports describing the  
33 interaction of PtdIns(4,5)P<sub>2</sub> present on the peroxisome surface with the lysosomal protein synaptotagmin VII  
34 to establish contact sites between lysosomes and peroxisomes (Chu et al., 2015; Hu et al., 2018). More  
35 studies will be needed to define the role of PtdIns and PPIIn species in these compartments.

1           Considering that the biosynthetic machinery required for PtdIns production is almost exclusively  
2 localized to the ER, the low abundance of PtdIns in membranes where PPIIn species play critical regulatory  
3 roles, such as in the PM or endosomes raises the question whether PtdIns delivery to these compartments is  
4 part of the process by which PPIIn generation is controlled. Our previous studies identifying a mobile ER-  
5 derived PIS compartment that would be an ideal candidate to serve as a PtdIns delivery platforms (Kim et al.,  
6 2011). It is important to note that no PtdIns was detected using the *BcPI-PLC<sup>H82A</sup>* probe in the dynamic PIS-  
7 positive structures. This finding may suggest that PtdIns is rapidly transferred from this active compartment to  
8 acceptor membranes where it is again quickly converted to either PtdIns4P, such as in the PM or Golgi  
9 complex, or PtdIns3P in early endosomes. It is also noteworthy that, except for the Golgi complex, PtdIns  
10 appears to be enriched in membranes that lack significant local pools of PPIIn lipids. Therefore, it is possible  
11 that the relatively low PtdIns content associated with the PM and endosomal system reflects the fact that local  
12 delivery of PtdIns is tightly coupled to the production of phosphorylated PPIIn derivatives. In this context, it is  
13 worth reiterating the fact that it was more effective to alter the levels of PtdIns4P in the PM and PtdIns3P levels  
14 in endosomes by consuming PtdIns at the ER rather than trying to intercept PtdIns within the specific  
15 membranes where the PPIIn lipids are made. These data suggest a direct channeling of the PtdIns substrate  
16 to the respective PPIIn-producing kinases in the membranes receiving PtdIns and also stresses the importance  
17 of understanding how newly synthesized PtdIns produced in the ER reaches other membranes. Vesicular  
18 trafficking is an obvious route for PtdIns delivery, especially for communication between the ER and Golgi  
19 complex, but non-vesicular lipid transfer by specialized lipid-transfer proteins (LTPs) is increasingly recognized  
20 as a plausible alternative, if not the major lipid transport mechanism (Kim et al., 2013; Wong et al., 2019). In  
21 fact, the complex interplay between the vesicular and non-vesicular transport systems that converge at the  
22 Golgi complex might help to explain the unique enrichment of both PtdIns and PtdIns4P that occurs in this  
23 compartment and could also be an indication of functional heterogeneity in the PtdIns pools that exist  
24 throughout the ER and Golgi interface. More generally, it seems as though non-vesicular transport of PtdIns  
25 is likely to drive the local delivery of PtdIns in diverse membrane contexts. Interestingly, members of the  
26 StArkin-related and Sec14 domain-containing (CRAL-TRIO) superfamilies of LTPs have been classically  
27 defined as PtdIns-transfer proteins (PITPs) that are thought to function by redistributing PtdIns from donor to  
28 acceptor membranes, likely as part of a heterotypic exchange involving additional lipid species such as  
29 phosphatidylcholine or phosphatidic acid (Cockcroft and Carvou, 2007; Grabon et al., 2019). Despite their  
30 name, it is yet to be understood how these PITPs function within intact cells; although unique PITPs are  
31 increasingly linked to specific signaling modalities in studies of model organisms (Xie et al., 2018; Huang et  
32 al., 2018). In addition to the autonomous PITPs, recent work has also suggested that PtdIns can be used as  
33 a lipid cargo by the relatively promiscuous TUBular LIPid-binding (TULIP) family of LTPs that possess  
34 synaptotagmin-like mitochondrial lipid-binding protein (SMP) domains; including a report of preferential PtdIns  
35 transfer from the ER to the PM by the SMP domain-containing protein TMEM24 following PLC activation and  
36 PtdIns(4,5)P<sub>2</sub> hydrolysis (Lees et al., 2017). Understanding the cargo selectivity and potential interplay

1 between the diverse families of PtdIns-binding LTPs represents a major goal for future studies. The inability  
2 of the FKBP-*BcPI-PLC<sup>AA</sup>* to intercept and hydrolyze the delivered PtdIns within the acceptor membrane are  
3 not at odds with the proposed model of substrate-presentation by various families of LTPs to membrane  
4 associated effectors, including both major superfamilies of PITPs (Panaretou et al., 1997; Bankaitis et al.,  
5 2010; Grabon et al., 2015). The ability to directly channel the delivered PtdIns to PPIIn-producing or PtdIns-  
6 modifying enzymes is tantalizing, however there is not yet a clear structural basis for how the bound PtdIns  
7 cargo could be efficiently moved into or interfaced with known PtdIns kinases. While direct presentation of the  
8 substrate to effectors is certainly not a necessity, our observations demonstrate the intimate relationship  
9 between PtdIns transport from the ER and PPIIn turnover using intact cell membranes. These details clearly  
10 merit further investigation and could have important translational consequences for defining novel regulatory  
11 mechanisms that facilitate the localized production of clinically-relevant PPIIn lipids.

12 Lastly, while our studies suggest that PtdIns is the primary localization signal responsible for recruiting  
13 the inactivated *BcPI-PLC<sup>H82A</sup>* probe to membrane compartments, it is important to note that PtdIns binding  
14 may not be the sole determinant responsible for the membrane affinity of this probe. In particular, *in vitro*  
15 studies have shown that the  $K_d$  associated with binding of the *Bacillus* PI-PLC to substrate-poor vesicles is  
16 significantly lower than the apparent  $K_m$  for the hydrolysis of membrane-embedded PtdIns (Qian et al., 1998).  
17 These data highlight the fact that membrane recognition by the *BcPI-PLC* requires a combination of interfacial  
18 as well as active site binding. Consequently, at present, it cannot be ruled out that, in addition to the presence  
19 of PtdIns, other membrane features, such as DAG content and local membrane packing defects (Lehto and  
20 Sharom, 2002; Ahyayauch et al., 2015) or the relative phosphatidylcholine abundance (Zhang et al., 2004; Pu  
21 et al., 2009; Yang et al., 2015), may also play a role in the association of the *BcPI-PLC<sup>H82A</sup>* probe with  
22 membranes. It is important to emphasize that our conclusions regarding the membrane distribution of PtdIns  
23 are based on a combination of approaches and not solely on *BcPI-PLC<sup>H82A</sup>* localization; even though this  
24 probe appears to faithfully map the cellular PtdIns landscape. However, we would still recommend caution  
25 when interpreting the results of experiments based solely on the behavior of the *BcPI-PLC<sup>H82A</sup>* probe.

26

## 27 **Summary**

28 In this study we present a unique platform for completing molecular investigations of PtdIns  
29 metabolism and trafficking that utilizes the substrate selectivity of the *BcPI-PLC*. Our experiments showed  
30 very limited amounts of PtdIns in the PM and endosomes as well as identified PtdIns within the membranes  
31 of the ER and an enrichment in the Golgi complex, peroxisomes, and outer mitochondrial membrane. Our  
32 results defining the subcellular distribution of PtdIns will pave the way for future studies that will address the  
33 functional role of PtdIns within these membrane compartments, including those independent of PPIIn  
34 production, which may significantly influence local membrane functions or cellular metabolism. In addition to  
35 defining the steady-state subcellular pools of PtdIns, we also provide a powerful new strategy to dissect the  
36 complex trafficking events that distribute PtdIns between membranes by selectively hydrolyzing distinct

1 intracellular pools of PtdIns. Results collected using these unique molecular approaches have allowed us to  
2 examine the relationship between localized PtdIns availability and PPIIn turnover. In the future, we hope that  
3 our findings defining the distribution and dynamics of PtdIns metabolism, as well as the establishment of these  
4 novel molecular tools, will allow for the identification of new regulatory pathways that integrate PtdIns  
5 production with more global changes in cellular lipid homeostasis. Additionally, it has not escaped our attention  
6 that establishing this organelle-targeted FKBP-*BcPI*-PLC<sup>AA</sup> recruitment system provides a unique opportunity  
7 to exploit the biophysical properties related to changing the relative abundance of PtdIns and DAG to examine  
8 the effects of selectively altering lipid composition on the local control of membrane dynamics. Overall, we  
9 hope these significant contributions to PtdIns biology not only enhance our understanding of the lipid  
10 landscape of eukaryotic membranes but also serve to inform our conceptions of the molecular mechanisms  
11 that control the onset of PPIIn-dependent pathologies, as well as other phospholipid-related disorders, which  
12 manifest within specific membrane contexts.

## 1 **Materials and Methods**

### 2 **Cell Culture**

3 COS-7 (CRL-1651; ATCC) or HEK293-AT1 cells, which stably express the rat AT<sub>1a</sub> angiotensin II  
4 receptor (Hunyady et al., 2002), were cultured in Dulbecco's Modified Eagle Medium (DMEM-high glucose;  
5 Life Technologies) containing 10% (vol/vol) FBS and supplemented with a 1% solution of  
6 penicillin/streptomycin (Gibco, Life Technologies). Alternatively, human HT-1080 fibrosarcoma cells (CCL-  
7 121; ATCC) were maintained using Eagle's Minimum Essential Medium (EMEM; Millipore Sigma)  
8 supplemented with 2 mM L-glutamine and containing 10% (vol/vol) FBS as well as a 1% solution of  
9 penicillin/streptomycin. Each of these cell lines were maintained at 37°C and 5% CO<sub>2</sub> in a humidified  
10 atmosphere. Cell lines are also regularly tested for *Mycoplasma* contamination using a commercially-available  
11 detection kit (InvivoGen) and, after thawing, all cell cultures are treated with plasmocin (InvivoGen) at 500  
12 µg/ml for the initial three passages (6-9 days) as well as supplemented with 5 µg/ml of the prophylactic for all  
13 subsequent passages.

14

### 15 **Reagents**

16 All compounds were prepared in the indicated solvent and stored in small aliquots at -20°C.  
17 Rapamycin (Sigma Millipore; 100 µM stock) and VPS34-IN1 (Selleck Chemicals; 300 µM stock) were  
18 dissolved in DMSO. Production and validation of the PI4KA-selective inhibitor, GSK-A1, has been described  
19 previously (Bojjireddy et al., 2014) and stock solutions were prepared at 100 µM in DMSO. Coelenterazine h  
20 (Regis Technologies) was dissolved in 100% ethanol (vol/vol) at 5 mM. Angiotensin II (Human octapeptide;  
21 Bachem) was first dissolved in ethanol at 1mM before being prepared as 100 µM aliquots for storage by  
22 dilution with ddH<sub>2</sub>O water. MitoTracker Red (ThermoFisher Scientific) was pre-diluted 1:100 in DMSO from  
23 the concentrated stock for storage in small aliquots at -20°C. Diluted solutions of MitoTracker Red were added  
24 directly to the medium of transfected cells at a 1:1000 dilution (1:100,000 final concentration) and allowed to  
25 equilibrate for 15-30 min at 37°C prior to imaging.

26

### 27 **DNA Constructs**

28 In general, plasmids were constructed by standard restriction cloning using enzymes from New  
29 England Biolabs, while site directed mutagenesis was done using the QuickChange II kit (Agilent). Complex  
30 reconfigurations of vector backbones and all point mutations were subsequently verified using standard  
31 Sanger sequencing (Macrogen, USA). Briefly, the design of the following plasmids have been described  
32 elsewhere: EGFP-FAPP1<sub>PH</sub> (Balla et al., 2005), PM2-FRB-ECFP (Várnai et al., 2006), mRFP-FKBP-5-ptase-  
33 dom (Várnai et al., 2006), mRFP-ER(Sac1<sub>1-38</sub>) (Várnai et al., 2007), AKAP-FRB-ECFP (Csordás et al., 2010),  
34 mRFP-PI-PLC (*Listeria monocytogenes*; Kim et al., 2011), EGFP-PKDC1<sub>ab</sub> (Kim et al., 2011), EGFP-P4M<sub>SidM</sub>  
35 (Hammond et al., 2014), mCherry-P4M<sub>SidM</sub> (Hammond et al., 2014), iRFP-P4M<sub>SidM</sub> (Hammond et al., 2014),  
36 EGFP-P4M<sub>SidM</sub><sup>X2</sup> (Hammond et al., 2014), iRFP-FRB-Rab5 (Hammond et al., 2014), iRFP-FRB-Rab7

1 (Hammond et al., 2014), mCherry-FKBP-PI4KA<sup>ΔN</sup> (Hammond et al., 2014), mCherry-FKBP-PI4KA<sup>ΔN</sup> D1957A  
2 (Hammond et al., 2014), FRB-mCherry-Giantin<sub>tail</sub> (Hammond et al., 2014), NES-mdsRed-Spo20<sup>DM</sup> (Kim et al.,  
3 2015), L<sub>10</sub>-mVenus-T2A-sLuc-D4H (Sohn et al., 2018), sLuc-P4M<sub>SidM</sub><sup>X2</sup>-T2A-mVenus-Rab5 (Baba et al.,  
4 2019), sLuc-P4M<sub>SidM</sub><sup>X2</sup>-T2A-mVenus-Rab7 (Baba et al., 2019), sLuc-FYVE<sup>EEA1</sup>-T2A-mVenus-Rab5 (Baba et  
5 al., 2019), and sLuc-FYVE<sup>EEA1</sup>-T2A-mVenus-Rab7 (Baba et al., 2019). Also, we would like to thank the  
6 laboratories of Harald Stenmark (EGFP-FYVE<sub>Hrs</sub><sup>X2</sup>; Gillyooly et al., 2000), Jennifer Lippincott-Schwartz (mRFP-  
7 SKL; Kim et al., 2006), Takanari Inoue (ECFP-FRB-Giantin; Komatsu et al., 2010), Robert Lodge (mCherry-  
8 Rab5<sup>WT</sup> and mCherry-Rab7<sup>WT</sup>; Hammond et al., 2014), Bianxiao Cui (Addgene plasmid #102250; Duan et al.,  
9 2015), Peter Várnai (PLCδ1<sub>PH</sub>-mVenus, L<sub>10</sub>-mVenus-T2A-sLuc-P4M<sub>SidM</sub><sup>X2</sup>, L<sub>10</sub>-mVenus-T2A-sLuc-PLCδ1<sub>PH</sub>,  
10 L<sub>10</sub>-FRB-T2A-mRFP-FKBP-Pseudojanin, and L<sub>10</sub>-FRB-T2A-mRFP-FKBP-Pseudojanin<sup>DEAD</sup>; Tóth et al., 2016),  
11 and Gerry Hammond (mTagBFP2-FKBP-CyB5<sub>tail</sub>; Zewe et al., 2018) for generously providing constructs.  
12 Alternatively, the cloning procedures used for generating DNA constructs unique to this study are provided  
13 below and the primers required for both PCR-mediated cloning or site-directed mutagenesis are listed in  
14 Supplemental Table S4.

15 To facilitate the diverse cloning strategies needed for this study, the *Bacillus cereus* (*Bc*)PI-PLC (signal  
16 peptide removed, residues 32-329; GenBank Accession: AAA22665.1) was codon-optimized for mammalian  
17 expression and custom synthesized in the pUCminusMCS vector shuttle by Blue Heron Biotech LLC (Bothell,  
18 WA, USA). EGFP-*Bc*PI-PLC was generated by inserting the *Bc*PI-PLC sequence into the pEGFP-C1 vector  
19 (Clontech) using the flanking EcoRI and BamHI restriction sites included in the synthesized pUCminusMCS-  
20 *Bc*PI-PLC construct. Site directed mutagenesis of the parent EGFP-*Bc*PI-PLC backbone was done to  
21 introduce alanine substitutions at His32 (H32A), His82 (H82A), Trp47 (W47A), and Trp242A (W242A); as well  
22 as sequential mutagenesis of both interfacial tryptophan residues to generate EGFP-*Bc*PI-PLC W47A/W242A  
23 (<sup>AA</sup>). To facilitate co-localization studies with the various EGFP-*Bc*PI-PLC constructs, mRFP-PKDC1<sub>ab</sub> and  
24 AKAP-mRFP were made using the original cloning sites to digest the respective GFP-tagged variants and  
25 insert them into the empty pmRFP-C1 or pmRFP-N1 vectors (Clontech). Alternatively, the recruitable mRFP-  
26 FKBP-*Bc*PI-PLC<sup>AA</sup> enzyme was created by replacing the Type IV 5-phosphatase domain in the mRFP-FKBP-  
27 5-ptase-dom construct with the *Bc*PI-PLC<sup>AA</sup> insert amplified from EGFP-*Bc*PI-PLC<sup>AA</sup> using SacI and KpnI  
28 restriction sites. To alleviate any concerns related to potential interference with BRET measurements, we also  
29 made iRFP-FKBP-*Bc*PI-PLC<sup>AA</sup> by replacing the mRFP with the iRFP module from iRFP-P4M<sub>SidM</sub> using NheI  
30 and BspEI restriction sites. Site directed mutagenesis of the iRFP-FKBP-*Bc*PI-PLC<sup>AA</sup> backbone was used to  
31 generate the H32A inactive control as well as the R163A, R163K, Y200A, and Y200F active site mutants for  
32 screening. Similarly, for BRET measurements using recruitment of the FKBP-PI4KA, iRFP-FKBP-PI4KA<sup>ΔN</sup>  
33 was generated from mCherry-FKBP-PI4KA<sup>ΔN</sup> by replacing mCherry with the iRFP insert from iRFP-FKBP-  
34 *Bc*PI-PLC<sup>AA</sup> using AgeI and HindIII restriction sites. Using the resulting iRFP-FKBP-PI4KA<sup>ΔN</sup> construct, we  
35 also made a catalytically inactive mutant by replacing the PI4KA<sup>ΔN</sup> with the PI4KA<sup>ΔN</sup> D1957A insert from  
36 mCherry-FKBP-PI4KA<sup>ΔN</sup> D1957A using HindIII and KpnI restriction sites. For the recruitment of FKBP-tagged

1 enzymes, the ER-targeted mTagBFP2-FRB-CyB5<sub>tail</sub> construct was created by amplifying the FRB insert from  
2 AKAP-FRB-ECFP and replacing the FKBP12 module from mTagBFP2-FKBP-CyB5<sub>tail</sub> using XhoI and EcoRI  
3 restriction sites. Peroxisomal targeting was done by creating the PEX-FRB-ECFP recruiter by amplifying the  
4 transmembrane peroxisome-targeting domain of PEX3 (residues 1-42; Duan et al., 2015) from PEX-mCherry-  
5 CRY2 and inserting this in place of the AKAP sequence in AKAP-FRB-ECFP using NheI and BamHI restriction  
6 sites. Mutagenesis of the ECFP (W66A) or mTagBFP2 (E215A) chromophores through alanine substitution  
7 was done to inactivate the fluorescence of the AKAP-FRB-ECFP, PEX-FRB-ECFP, ECFP-FRB-Giantin, PM2-  
8 FRB-ECFP, and mTagBFP2-FRB-CyB5<sub>tail</sub> membrane recruitment constructs to prevent interference with the  
9 BRET measurements.

10 The design of the organelle-specific BRET biosensors required several unique cloning strategies. To  
11 construct the mito-DAG<sup>BRET</sup> (AKAP-mVenus-T2A-sLuc-PKDC1<sub>ab</sub>), mito-PtdIns4P<sup>BRET</sup> (AKAP-mVenus-T2A-  
12 sLuc-P4M<sub>SidM</sub><sup>X2</sup>), and mito-H82A<sup>BRET</sup> (AKAP-mVenus-T2A-sLuc-BcPI-PLC<sup>H82A</sup>) biosensors, we first generated  
13 AKAP-mVenus by exchanging the PLC $\delta$ 1<sub>PH</sub> domain from PLC $\delta$ 1<sub>PH</sub>-mVenus with the mitochondrial-targeting  
14 sequence (N-terminal residues 34-63 of mAKAP1; Csordás et al., 2010) from AKAP-mRFP using AgeI and  
15 NotI restriction sites. Specifically for the mito-DAG<sup>BRET</sup> construct, we also needed to make an L<sub>10</sub>-mVenus-  
16 T2A-sLuc-PKDC1<sub>ab</sub> intermediate by replacing the P4M<sub>SidM</sub><sup>X2</sup> module of L<sub>10</sub>-mVenus-T2A-sLuc-P4M<sub>SidM</sub><sup>X2</sup> with  
17 the PKDC1<sub>ab</sub> domain from EGFP-PKDC1<sub>ab</sub> using BglII and BamHI restriction sites. We then used an NheI and  
18 BsrGI double-digest to insert the AKAP-mVenus fragment in place of the L<sub>10</sub>-mVenus targeting sequence in  
19 both L<sub>10</sub>-mVenus-T2A-sLuc-PKDC1<sub>ab</sub> and L<sub>10</sub>-mVenus-T2A-sLuc-P4M<sub>SidM</sub><sup>X2</sup> to make the final AKAP-mVenus-  
20 T2A-sLuc-P4M<sub>SidM</sub><sup>X2</sup> and AKAP-mVenus-T2A-sLuc-PKDC1<sub>ab</sub> constructs. Alternatively, AKAP-mVenus-T2A-  
21 sLuc-BcPI-PLC<sup>H82A</sup> was generated by amplifying out the BcPI-PLC<sup>H82A</sup> insert from EGFP-BcPI-PLC<sup>H82A</sup> and  
22 inserting it in place of the PKDC1<sub>ab</sub> module from AKAP-mVenus-T2A-sLuc-PKDC1<sub>ab</sub> using SpeI and BamHI  
23 restriction sites. Production of the ER-DAG<sup>BRET</sup> (sLuc-PKDC1<sub>ab</sub>-T2A-mVenus-CyB5<sub>tail</sub>), Golgi-DAG<sup>BRET</sup> (sLuc-  
24 PKDC1<sub>ab</sub>-T2A-mVenus-Giantin), and PEX-DAG<sup>BRET</sup> (PEX3<sub>1-42</sub>-mVenus-T2A-sLuc-PKDC1<sub>ab</sub>) biosensors also  
25 required sequential steps. First, the CyB5<sub>tail</sub> or Giantin membrane-targeting fragments were amplified from  
26 mTagBFP2-FKBP-CyB5<sub>tail</sub> and ECFP-FRB-Giantin, respectively, and inserted in place of Rab7 in sLuc-  
27 FYVE<sup>EEA1</sup>-T2A-mVenus-Rab7 using BspEI and KpnI restriction sites. The FYVE<sup>EEA1</sup> domain was then replaced  
28 with PKDC1<sub>ab</sub> in both the sLuc-FYVE<sup>EEA1</sup>-T2A-mVenus-CyB5<sub>tail</sub> and sLuc-FYVE<sup>EEA1</sup>-T2A-mVenus-Giantin  
29 constructs by amplifying the PKDC1<sub>ab</sub> insert from AKAP-mVenus-T2A-sLuc-PKDC1<sub>ab</sub> and using PvuI and Sall  
30 restriction sites. Alternatively, we utilized a unique PvuI site present in the L<sub>10</sub>-mVenus-T2A-sLuc-Spo20<sup>(DM)</sup>  
31 construct to replace the PM-targeting sequence with the transmembrane PEX3<sub>1-42</sub> fragment amplified from  
32 PEX-mCherry-CRY2 using NdeI and PvuI restriction sites. From the PEX3<sub>1-42</sub>-mVenus-T2A-sLuc-Spo20<sup>(DM)</sup>  
33 intermediate, we replaced the PtdOH-binding Spo20<sup>51-90</sup> C54S / C82S (Spo20<sup>DM</sup>) cassette with the PKDC1<sub>ab</sub>  
34 domain from AKAP-mVenus-T2A-sLuc-PKDC1<sub>ab</sub> using BsrGI and BamHI restriction sites. Although not  
35 directly used in this study, the L<sub>10</sub>-mVenus-T2A-sLuc-Spo20<sup>(DM)</sup> construct was designed by amplifying the  
36 Spo20<sup>DM</sup> insert from NES-mdsRed-Spo20<sup>DM</sup> and replacing the P4M<sub>SidM</sub><sup>X2</sup> module in L<sub>10</sub>-mVenus-T2A-sLuc-

1 P4M<sub>SidM</sub><sup>X2</sup> using BglII and EcoRI restriction sites. This construct was chosen for mutagenesis to introduce a  
2 unique PvuI site between the membrane-targeting and mVenus modules due to the relative abundance of  
3 unique cloning sites surrounding the Spo20<sup>DM</sup> cassette at the N-terminus of this construct. To measure  
4 potential changes in the PM localization of the PtdIns-sensitive *BcPI-PLC*<sup>H82A</sup> probe, we generated the PM-  
5 H82A<sup>BRET</sup> (L<sub>10</sub>-mVenus-T2A-sLuc-*BcPI-PLC*<sup>H82A</sup>) biosensor using XhoI and EcoRI restriction sites to replace  
6 the cholesterol-binding D4H domain in the L<sub>10</sub>-mVenus-T2A-sLuc-D4H construct with the *BcPI-PLC*<sup>H82A</sup> insert  
7 amplified from EGFP-*BcPI-PLC*<sup>H82A</sup>. Within the endosomal system, the Rab5-DAG<sup>BRET</sup> (sLuc-PKDC1<sub>ab</sub>-T2A-  
8 mVenus-Rab5) biosensor was made using PvuI and AgeI restriction sites to swap out the FYVE<sup>EEA1</sup> domain  
9 in sLuc-FYVE<sup>EEA1</sup>-T2A-mVenus-Rab5 for the PKDC1<sub>ab</sub> domain from sLuc-PKDC1<sub>ab</sub>-T2A-mVenus-CyB5<sub>tail</sub>.  
10 Alternatively, for creating the Rab7-DAG<sup>BRET</sup> (sLuc-PKDC1<sub>ab</sub>-T2A-mVenus-Rab7) biosensor, the FYVE<sup>EEA1</sup>  
11 domain from sLuc-FYVE<sup>EEA1</sup>-T2A-mVenus-Rab7 was exchanged for PKDC1<sub>ab</sub> from sLuc-PKDC1<sub>ab</sub>-T2A-  
12 mVenus-CyB5<sub>tail</sub> using PvuI and Sall restriction sites. The high-affinity Rab7-PtdIns3P<sup>BRET</sup> (sLuc-FYVE<sup>Hrs</sup><sup>X2</sup>-  
13 T2A-mVenus-Rab7) biosensor was constructed by replacing the FYVE<sup>EEA1</sup> module within sLuc-FYVE<sup>EEA1</sup>-  
14 T2A-mVenus-Rab7 with the FYVE<sup>Hrs</sup><sup>X2</sup> insert amplified from EGFP-FYVE<sup>Hrs</sup><sup>X2</sup> using PvuI and Sall restriction  
15 sites. Alternatively, to make the high-affinity Rab5-PtdIns3P<sup>BRET</sup> (sLuc-FYVE<sup>Hrs</sup><sup>X2</sup>-T2A-mVenus-Rab5)  
16 biosensor, the FYVE<sup>Hrs</sup><sup>X2</sup>-T2A-mVenus insert from sLuc-FYVE<sup>Hrs</sup><sup>X2</sup>-T2A-mVenus-Rab7 was inserted in place  
17 of FYVE<sup>EEA1</sup>-T2A-mVenus in sLuc-FYVE<sup>EEA1</sup>-T2A-mVenus-Rab5 using PvuI and HindIII restriction sites.

18

### 19 **Live-Cell Confocal Microscopy**

20 For imaging, HEK293-AT1 cells (3x10<sup>5</sup> cells/dish) were plated with a final volume of 1.5 mL on 29 mm  
21 circular glass-bottom culture dishes (#1.5; Cellvis) pre-coated with 0.01% poly-L-lysine solution (Sigma), while  
22 both the COS-7 (1x10<sup>5</sup> cells/dish) and HT-1080 (1.5x10<sup>5</sup> cells/dish) cell lines were plated without any  
23 additional coating of the culture dishes. The cells were allowed to attach overnight prior to transfection of  
24 plasmid DNAs (0.1-0.2 µg/well) using Lipofectamine 2000 (2-5 µL/well; Invitrogen) within a small volume of  
25 Opti-MEM (200 µL; Invitrogen) according to the manufacturer's instructions, with the slight modification of  
26 removing the media containing the Lipofectamine-complexed DNA at 4-6 h post-transfection and replacing it  
27 with complete culture medium. In general, cell densities were always kept between 50-80% confluence for the  
28 day of imaging. Also, please note that studies using the rapamycin-inducible protein heterodimerization  
29 system used a 1:2:1 ratio of plasmid DNA for transfection of the FKBP-tagged enzyme (0.1 µg), FRB-labelled  
30 recruiter (0.2 µg), and indicated protein or biosensor of interest (0.1 µg; total DNA: 0.4 µg/well). After 18-20 h  
31 of transfection, cells were incubated in 1 mL of modified Krebs-Ringer solution (containing 120 mM NaCl,  
32 4.7 mM KCl, 2 mM CaCl<sub>2</sub>, 0.7 mM MgSO<sub>4</sub>, 10 mM glucose, 10 mM HEPES, and adjusted to pH 7.4) and  
33 images were acquired at room temperature using either the Zeiss LSM 710 (63x/1.40 N.A. Plan-Apochromat  
34 Oil objective) or Zeiss LSM 880 (63x/1.40 N.A. Plan-Apochromat Oil DIC M27 objective) laser-scanning  
35 confocal microscopes (Carl Zeiss Microscopy). Image acquisition was performed using the ZEN software  
36 system (Carl Zeiss Microscopy), while image preparation and analysis was done using the open-source FIJI



1 platform (Schindelin et al., 2012). Please note, unless explicitly labeled otherwise, all representative images  
2 shown are of HEK293-AT1 cells.

3

#### 4 **Measurements of Membrane Lipid Composition using BRET-based biosensors within Intact Cells**

5 The construction of the BRET-based lipid reporters has been detailed above. Briefly, the design of  
6 these biosensors allows for the quantitative description of membrane lipid composition within defined  
7 subcellular compartments at the population scale using intact cells. This methodology relies on a multicistronic  
8 plasmid design that incorporates a self-cleaving viral 2A peptide to facilitate the production of two separate  
9 proteins in transfected cells at a fixed stoichiometry; specifically, a membrane-anchored BRET acceptor  
10 (mVenus) and a Luciferase-tagged peripheral lipid-binding probe that serves as the BRET donor. BRET  
11 measurements were made at 37°C using a Tristar2 LB 942 Multimode Microplate Reader (Berthold  
12 Technologies) with customized emission filters (540/40 nm and 475/20 nm). HEK293-AT1 cells ( $1 \times 10^5$   
13 cells/well) were seeded in a 200  $\mu$ L total volume to white-bottom 96 well plates and cultured overnight. Cells  
14 were then transfected with 0.25  $\mu$ g of the specified BRET biosensor using Lipofectamine 2000 (1  $\mu$ L/well)  
15 within OPTI-MEM (40  $\mu$ L) according to the manufacturer's protocol; once again with the slight modification of  
16 removing the media containing the Lipofectamine-complexed DNA and replacing it with complete culture  
17 medium at between 4-6 h post-transfection. Where indicated, additional plasmids, including components of  
18 the rapamycin-inducible heterodimerization system, were transfected together with the BRET biosensor at an  
19 empirically determined ratio of 1:1:5 for the FRB (0.05  $\mu$ g), FKBP (0.05  $\mu$ g), and BRET (0.25  $\mu$ g) constructs,  
20 respectively (0.35  $\mu$ g/well total). Between 20-24 h post-transfection, the cells were quickly washed before  
21 being incubated for 30 minutes in 50  $\mu$ l of modified Krebs-Ringer buffer (containing 120 mM NaCl, 4.7 mM  
22 KCl, 2 mM  $\text{CaCl}_2$ , 0.7 mM  $\text{MgSO}_4$ , 10 mM glucose, 10 mM HEPES, and adjusted to pH 7.4) at 37°C in a  $\text{CO}_2$ -  
23 independent incubator. After the pre-incubation period, the cell-permeable luciferase substrate,  
24 coelenterazine h (40  $\mu$ l, final concentration 5  $\mu$ M), was added and the signal from the mVenus fluorescence  
25 and sLuc luminescence were recorded using 485 and 530 nm emission filters over a 4 min baseline BRET  
26 measurement (15 s / cycle). Following the baseline recordings, where indicated, the plates were quickly  
27 unloaded for the addition of various treatments; which were prepared in a 10  $\mu$ l volume of the modified Krebs-  
28 Ringer solution and added manually. Detection time was always 500 ms for each wavelength and  
29 measurements continued for 60 min (15 s / cycle) after the addition of any treatments. All measurements were  
30 carried out in triplicate wells and repeated in three independent experiments. From each well, the BRET ratio  
31 was calculated by dividing the 530 nm and 485 nm intensities, and normalized to the baseline measurement.  
32 The normalized BRET ratio obtained from drug-treated cells was always normalized to vehicle controls.  
33 Additionally, to facilitate direct comparisons, where indicated, values obtained from the recruitment of active  
34 enzymes were also normalized to control measurements made simultaneously using the corresponding  
35 catalytically-inactive variants.

36

## 1 **Protein Expression and Purification**

2 The mutant BcPI-PLC<sup>H82A</sup> was cloned into a pHIS-GB1 expression vector with an N-terminal His6x-  
3 GB1 solubility tag and a TEV cleavage site (Baumlova et al., 2014) The protein was over-expressed in *E.coli*  
4 BL21 Star cells and subsequently purified using affinity chromatography on a Ni-NTA resin column (Machery-  
5 Nagel). The solubility tag was cleaved with TEV protease and the protein further purified by size exclusion  
6 chromatography (Superdex75 GL300/10/300; GE Healthcare) at 4°C in a SEC buffer (20 mM HEPES, 3 mM  
7 β-mercaptoethanol, and adjusted pH to 7.0). The purified protein was concentrated to 10 mg/ml and stored at  
8 -80°C.

## 10 **Crystallization and Crystallographic Analysis**

11 For crystallization, BcPI-PLC<sup>H82A</sup> (10 mg/ml) was supplemented with 100 mM myo-inositol. The  
12 crystals were obtained using the sitting-drop vapor-diffusion method at 18°C by mixing 300 nl of protein-ligand  
13 complex with a reservoir solution (Morpheus screen; Molecular dimensions). The diffraction data set was  
14 collected at BESSY-II beamline (Mueller et al., 2012). The crystals belonged to the hexagonal P6<sub>3</sub>22 space  
15 group and diffracted to 2.7Å. Data were processed in XDSAPP (Krug et al., 2012) and the structure was solved  
16 by molecular replacement using Phaser (McCoy et al., 2007) and previously solved structure of tw PI-PLC  
17 (PDB Accession: 1GYM; Heinz et al., 1996) as a search model. Refinement of the structure was performed  
18 using Phenix (Adams et al., 2010) or Coot (Debreczeni and Emsley, 2012) to R<sub>work</sub>= 21.62% and R<sub>free</sub>=  
19 24.47%. Protein structures were retrieved using the Protein Data Bank (PDB; Berman et al., 2003) and  
20 prepared using the PyMOL Molecular Graphics System Version 2.0 (Schrödinger, LLC).

## 22 **Online Supplemental Material**

23 Supplemental Figure S1 compares the overall architecture of the solved BcPI-PLC<sup>H82A</sup> structure with  
24 the existing myo-inositol bound BcPI-PLC structure (PDB Accession: 1PTG; Heinz et al., 1995) as well as  
25 shows the electron density map surrounding the inositol headgroup in the BcPI-PLC<sup>H82A</sup> active site.  
26 Supplemental Figure S2 compares the steady-state distribution of the BcPI-PLC<sup>H82A</sup> probe in the COS-7,  
27 HEK293-AT1, and HT-1080 cell lineages, with a specific focus on the ER-mitochondria interface.  
28 Supplemental Figure S3 provides a schematic explanation of the rationale for using chemical dimerization of  
29 the modified FKBP-BcPI-PLC<sup>AA</sup> to spatially restrict membrane PtdIns hydrolysis and also provides preliminary  
30 data directly comparing active site modifications designed to tune the catalysis of the FKBP-BcPI-PLC<sup>AA</sup>  
31 scaffold. Lastly, a catalog of the primers required for PCR-mediated cloning or site-directed mutagenesis are  
32 listed in Supplemental Table S5.

## 1 **Acknowledgements**

2 This work was supported by the Intramural Research Program (IRP) of the Eunice Kennedy Shriver  
3 National Institute of Child Health and Human Development (NICHD). Additional support to J.G.P. was provided  
4 by a *Eunice Kennedy Shriver* National Institute of Child Health and Human Development (NICHD) Visiting  
5 Fellowship and the Natural Sciences and Engineering Research Council of Canada (NSERC) Banting  
6 Postdoctoral Fellowship. A.E. and E.B. were supported from European Regional Development Fund; OP RDE;  
7 Project: "Chemical biology for drugging undruggable targets (ChemBioDrug)" (No.  
8 CZ.02.1.01/0.0/0.0/16\_019/0000729) and by the Academy of Sciences Czech Republic (RVO: 61388963).  
9 The authors declare no competing financial interests.

10 We would like to thank Helmholtz-Zentrum Berlin for the allocation of synchrotron radiation beamtime  
11 and the laboratories of Dr. Bianxiao Cui (Stanford University, USA), Dr. Gerry Hammond (University of  
12 Pittsburgh, USA), Dr. Takanari Inoue (Johns Hopkins University, USA), Dr. Jennifer Lippincott-Schwartz  
13 (HHMI Janelia Research Campus, USA), Dr. Robert Lodge (Institut de Recherches Cliniques de Montreal,  
14 Canada), Dr. Harald Stenmark (University of Oslo, Norway), and Dr. Peter Várnai (Semmelweis University  
15 Medical School, Hungary) for generously providing DNA constructs. We are also grateful to Dr. Takashi Baba  
16 (Akita University, Japan) and Dr. Gergó Gulyás (Semmelweis University Medical School, Hungary) for their  
17 assistance with molecular cloning efforts. Confocal imaging was performed at the Microscopy & Imaging Core  
18 of the NICHD with the kind assistance of Dr. Vincent Schram and Lynne Holtzclaw. Lastly, with approval from  
19 the co-authors, Joshua Pemberton would like to dedicate this study to his Father, the late Dr. S. George  
20 Pemberton (University of Alberta, Canada), whose insightful scientific discussions as well as mentorship were  
21 invaluable for the completion of this study and the lessons learned will never be forgotten.

22

23

## 24 **Author Contributions**

25 J.G. Pemberton, Y.J. Kim, D.J. Toth, E. Boura, and T. Balla conceived of the experiments and  
26 developed the methods. J.G. Pemberton, Y.J. Kim, N. Sengupta, A. Eisenreichova, E. Boura, and T. Balla  
27 performed the experiments. J.G. Pemberton, E. Boura, and T. Balla analyzed the data. T. Balla and E. Boura  
28 acquired grant money for this study. J.G. Pemberton wrote the original draft of the manuscript. J.G.  
29 Pemberton, Y.J. Kim, E. Boura, and T. Balla reviewed and edited the manuscript.

## 1 **References**

- 2 Adams, P.D, P.V. Afonine, G. Bunkóczy, V.B. Chen, I.W. Davis, N. Echols, J.J. Headd, L. Hung, G.J. Kapral,  
3 R.W. Grosse-Kunstleve, A.J. McCoy, N.W. Moriarty, R. Oeffner, R.J. Read, D.C. Richardson, J.S. Richardson,  
4 T.C. Terwilliger, and P.H. Zwart. 2010. PHENIX: a comprehensive Python-based system for macromolecular  
5 structure solution. *Acta Crystallogr D Biol Crystallogr.* 66:213-221.  
6
- 7 Agranoff, B.W., R.M. Bradley, and R.O. Brady. 1958. The enzymatic synthesis of inositol phosphatide. *J Biol*  
8 *Chem.* 233:1077-1083.  
9
- 10 Ahyayauch, H., J. Sot, M.I. Collado, N. Huarte, J. Requejo-Isidro, A. Alonso, and F.M. Goni. 2015. End-product  
11 diacylglycerol enhances the activity of PI-PLC through changes in membrane domain structure. *Biophys J.*  
12 108:1672-1682.  
13
- 14 Altan-Bonnet, N. 2017. Lipid Tales of Viral Replication and Transmission. *Trends Cell Biol.* 27:201-213.  
15
- 16 Alvarez-Prats, A., I. Bjelobaba, Z. Aldworth, T. Baba, D. Abebe, Y.J. Kim, S.S. Stojilkovic, M. Stopfer, and T.  
17 Balla. 2018. Schwann-Cell-Specific Deletion of Phosphatidylinositol 4-Kinase Alpha Causes Aberrant  
18 Myelination. *Cell Rep.* 23:2881-2890.  
19
- 20 Antonsson, B. 1997. Phosphatidylinositol synthase from mammalian tissues. *Biochim Biophys Acta.*  
21 1348:179-186.  
22
- 23 Ardail, D., J.P. Privat, M. Egret-Charlier, C. Levrat, F. Lerme, and P. Louisot. 1990. Mitochondrial contact sites.  
24 Lipid composition and dynamics. *J Biol Chem.* 265:18797-18802.  
25
- 26 Asp, L., F. Kartberg, J. Fernandez-Rodriguez, M. Smedh, M. Elsner, F. Laporte, M. Barcena, K.A. Jansen,  
27 J.A. Valentijn, A.J. Koster, J.J. Bergeron, and T. Nilsson. 2009. Early stages of Golgi vesicle and tubule  
28 formation require diacylglycerol. *Mol Biol Cell.* 20:780-790.  
29
- 30 Baba, T., D.J. Toth, N. Sengupta, Y.J. Kim, and T. Balla. 2019. Phosphatidylinositol 4,5-bisphosphate controls  
31 Rab7 and PLEKMH1 membrane cycling during autophagosome-lysosome fusion. *EMBO J.* 38.  
32
- 33 Bago, R., N. Malik, M.J. Munson, A.R. Prescott, P. Davies, E. Sommer, N. Shpiro, R. Ward, D. Cross, I.G.  
34 Ganley, and D.R. Alessi. 2014. Characterization of VPS34-IN1, a selective inhibitor of Vps34, reveals that the  
35 phosphatidylinositol 3-phosphate-binding SGK3 protein kinase is a downstream target of class III  
36 phosphoinositide 3-kinase. *Biochem J.* 463:413-427.  
37
- 38 Balla, A., Y.J. Kim, P. Varnai, Z. Szentpetery, Z. Knight, K.M. Shokat, and T. Balla. 2008. Maintenance of  
39 hormone-sensitive phosphoinositide pools in the plasma membrane requires phosphatidylinositol 4-kinase  
40 IIIalpha. *Mol Biol Cell.* 19:711-721.  
41
- 42 Balla, A., G. Tuymetova, M. Barshishat, M. Geiszt, and T. Balla. 2002. Characterization of type II  
43 phosphatidylinositol 4-kinase isoforms reveals association of the enzymes with endosomal vesicular  
44 compartments. *J Biol Chem.* 277:20041-20050.  
45
- 46 Balla, A., G. Tuymetova, A. Tsiomenko, P. Varnai, and T. Balla. 2005. A plasma membrane pool of  
47 phosphatidylinositol 4-phosphate is generated by phosphatidylinositol 4-kinase type-III alpha: studies with the  
48 PH domains of the oxysterol binding protein and FAPP1. *Mol Biol Cell.* 16:1282-1295.  
49
- 50 Balla, T. 2013. Phosphoinositides: tiny lipids with giant impact on cell regulation. *Physiol Rev.* 93:1019-1137.  
51
- 52 Balla, T., A.J. Baukal, G. Guillemette, and K.J. Catt. 1988. Multiple pathways of inositol polyphosphate  
53 metabolism in angiotensin-stimulated adrenal glomerulosa cells. *J Biol Chem.* 263:4083-4091.

- 1  
2 Bankaitis, V.A., C.J. Mousley, and G. Schaaf. 2010. The Sec14 superfamily and mechanisms for crosstalk  
3 between lipid metabolism and lipid signaling. *Trends Biochem Sci.* 35:150-160.  
4  
5 Barelli, H., and B. Antonny. 2016. Lipid unsaturation and organelle dynamics. *Curr Opin Cell Biol.* 41:25-32.  
6  
7 Baron, C.L., and V. Malhotra. 2002. Role of diacylglycerol in PKD recruitment to the TGN and protein transport  
8 to the plasma membrane. *Science.* 295:325-328.  
9  
10 Baumlova, A., D. Chalupska, B. Rózycki, M. Jovic, E. Wisniewski, M. Klima, A. Dubankova, D.P. Kloer, R.  
11 Nencka, T. Balla, and E. Boura. 2014. The crystal structure of the phosphatidylinositol 4-kinase II $\alpha$ . *EMBO*  
12 *Rep.* 15:1085-1092.  
13  
14 Belshaw, P.J., S.N. Ho, G.R. Crabtree, and S.L. Schreiber. 1996. Controlling protein association and  
15 subcellular localization with a synthetic ligand that induces heterodimerization of proteins. *Proc Natl Acad Sci*  
16 *U S A.* 93:4604-4607.  
17  
18 Berman, H., K. Henrick, and H. Nakamura. 2003. Announcing the worldwide Protein Data Bank. *Nat Struct*  
19 *Biol.* 10:980.  
20  
21 Berman, H.M., T.N. Bhat, P.E. Bourne, Z. Feng, G. Gilliland, H. Weissig, and J. Westbrook. 2000. The Protein  
22 Data Bank and the challenge of structural genomics. *Nat Struct Biol.* 7 Suppl:957-959.  
23  
24 Berridge, M.J. 2016. The Inositol Trisphosphate/Calcium Signaling Pathway in Health and Disease. *Physiol*  
25 *Rev.* 96:1261-1296.  
26  
27 Berridge, M.J., and R.F. Irvine. 1984. Inositol trisphosphate, a novel second messenger in cellular signal  
28 transduction. *Nature.* 312:315-321.  
29  
30 Bigay, J., and B. Antonny. 2012. Curvature, lipid packing, and electrostatics of membrane organelles: defining  
31 cellular territories in determining specificity. *Dev Cell.* 23:886-895.  
32  
33 Bojjireddy, N., J. Botyanszki, G. Hammond, D. Creech, R. Peterson, D.C. Kemp, M. Snead, R. Brown, A.  
34 Morrison, S. Wilson, S. Harrison, C. Moore, and T. Balla. 2014. Pharmacological and genetic targeting of the  
35 PI4KA enzyme reveals its important role in maintaining plasma membrane phosphatidylinositol 4-phosphate  
36 and phosphatidylinositol 4,5-bisphosphate levels. *J Biol Chem.* 289:6120-6132.  
37  
38 Bononi, A., M. Bonora, S. Marchi, S. Missiroli, F. Poletti, C. Giorgi, P.P. Pandolfi, and P. Pinton. 2013.  
39 Identification of PTEN at the ER and MAMs and its regulation of Ca(2+) signaling and apoptosis in a protein  
40 phosphatase-dependent manner. *Cell Death Differ.* 20:1631-1643.  
41  
42 Bossard, C., D. Bresson, R.S. Polishchuk, and V. Malhotra. 2007. Dimeric PKD regulates membrane fission  
43 to form transport carriers at the TGN. *J Cell Biol.* 179:1123-1131.  
44  
45 Boura, E., R. Nencka. 2015. Phosphatidylinositol 4-kinases: function, structure, and inhibition. *Exp Cell Res.*  
46 337:136-145.  
47  
48 Brugger, B. 2014. Lipidomics: analysis of the lipid composition of cells and subcellular organelles by  
49 electrospray ionization mass spectrometry. *Annu Rev Biochem.* 83:79-98.  
50  
51 Bruzik, K.S., A.A. Hakeem, and M.D. Tsai. 1994. Are D- and L-chiro-phosphoinositides substrates of  
52 phosphatidylinositol-specific phospholipase C? *Biochemistry.* 33:8367-8374.  
53

- 1 Bruzik, K.S., and M.D. Tsai. 1994. Toward the mechanism of phosphoinositide-specific phospholipases C.  
2 *Bioorg Med Chem.* 2:49-72.  
3
- 4 Bunney, T.D., and M. Katan. 2010. Phosphoinositide signalling in cancer: beyond PI3K and PTEN. *Nat Rev*  
5 *Cancer.* 10:342-352.  
6
- 7 Burke, J.E. 2018. Structural Basis for Regulation of Phosphoinositide Kinases and Their Involvement in  
8 Human Disease. *Mol Cell.* 71:653-673.  
9
- 10 Calvo, S.E., K.R. Clauser, and V.K. Mootha. 2016. MitoCarta2.0: an updated inventory of mammalian  
11 mitochondrial proteins. *Nucleic Acids Res.* 44:D1251-1257.  
12
- 13 Chazotte, B. 2011. Labeling mitochondria with MitoTracker dyes. *Cold Spring Harb Protoc.* 2011:990-992.  
14
- 15 Cho, W., and R.V. Stahelin. 2005. Membrane-protein interactions in cell signaling and membrane trafficking.  
16 *Annu Rev Biophys Biomol Struct.* 34:119-151.  
17
- 18 Choi, J., J. Chen, S.L. Schreiber, and J. Clardy. 1996. Structure of the FKBP12-rapamycin complex interacting  
19 with the binding domain of human FRAP. *Science.* 273:239-242.  
20
- 21 Chu, B.B., Y.C. Liao, W. Qi, C. Xie, X. Du, J. Wang, H. Yang, H.H. Miao, B.L. Li, and B.L. Song. 2015.  
22 Cholesterol transport through lysosome-peroxisome membrane contacts. *Cell.* 161:291-306.  
23
- 24 Cockcroft, S., and N. Carvou. 2007. Biochemical and biological functions of class I phosphatidylinositol  
25 transfer proteins. *Biochim Biophys Acta.* 1771:677-691.  
26
- 27 Csordas, G., P. Varnai, T. Golenar, S. Roy, G. Purkins, T.G. Schneider, T. Balla, and G. Hajnoczky. 2010.  
28 Imaging interorganelle contacts and local calcium dynamics at the ER-mitochondrial interface. *Mol Cell.*  
29 39:121-132.  
30
- 31 Daum, G., and J.E. Vance. 1997. Import of lipids into mitochondria. *Prog Lipid Res.* 36:103-130.  
32
- 33 de Kroon, A.I., D. Dolis, A. Mayer, R. Lill, and B. de Kruijff. 1997. Phospholipid composition of highly purified  
34 mitochondrial outer membranes of rat liver and *Neurospora crassa*. Is cardiolipin present in the mitochondrial  
35 outer membrane? *Biochim Biophys Acta.* 1325:108-116.  
36
- 37 Debreczeni, J.É., and P. Emsley. 2012. Handling ligands with Coot. *Acta Crystallogr D Biol Crystallogr.*  
38 68:425-430.  
39
- 40 Diaz Anel, A.M. 2007. Phospholipase C beta3 is a key component in the Gbetagamma/PKCeta/PKD-mediated  
41 regulation of trans-Golgi network to plasma membrane transport. *Biochem J.* 406:157-165.  
42
- 43 Dickson, E.J., and B. Hille. 2019. Understanding phosphoinositides: rare, dynamic, and essential membrane  
44 phospholipids. *Biochem J.* 476:1-23.  
45
- 46 Dong, R., Y. Saheki, S. Swarup, L. Lucast, J.W. Harper, and P. De Camilli. 2016. Endosome-ER Contacts  
47 Control Actin Nucleation and Retromer Function through VAP-Dependent Regulation of PI4P. *Cell.* 166:408-  
48 423.  
49
- 50 Donnelly, M.L., L.E. Hughes, G. Luke, H. Mendoza, E. ten Dam, D. Gani, and M.D. Ryan. 2001. The 'cleavage'  
51 activities of foot-and-mouth disease virus 2A site-directed mutants and naturally occurring '2A-like' sequences.  
52 *J Gen Virol.* 82:1027-1041.  
53

- 1 Downing, G.J., S. Kim, S. Nakanishi, K.J. Catt, and T. Balla. 1996. Characterization of a soluble adrenal  
2 phosphatidylinositol 4-kinase reveals wortmannin sensitivity of type III phosphatidylinositol kinases.  
3 *Biochemistry*. 35:3587-3594.  
4
- 5 Drobak, B.K., I.B. Ferguson, A.P. Dawson, and R.F. Irvine. 1988. Inositol-containing lipids in suspension-  
6 cultured plant cells: an isotopic study. *Plant Physiol*. 87:217-222.  
7
- 8 Duan, L., D. Che, K. Zhang, Q. Ong, S. Guo, and B. Cui. 2015. Optogenetic control of molecular motors and  
9 organelle distributions in cells. *Chem Biol*. 22:671-682.  
10
- 11 Dyson, J.M., C.G. Fedele, E.M. Davies, J. Becanovic, and C.A. Mitchell. 2012. Phosphoinositide  
12 phosphatases: just as important as the kinases. *Subcell Biochem*. 58:215-279.  
13
- 14 Feng, J., H. Wehbi, and M.F. Roberts. 2002. Role of tryptophan residues in interfacial binding of  
15 phosphatidylinositol-specific phospholipase C. *J Biol Chem*. 277:19867-19875.  
16
- 17 Fernandez-Ulibarri, I., M. Vilella, F. Lazaro-Dieguez, E. Sarri, S.E. Martinez, N. Jimenez, E. Claro, I. Merida,  
18 K.N. Burger, and G. Egea. 2007. Diacylglycerol is required for the formation of COPI vesicles in the Golgi-to-  
19 ER transport pathway. *Mol Biol Cell*. 18:3250-3263.  
20
- 21 Fili, N., V. Calleja, R. Woscholski, P.J. Parker, and B. Larijani. 2006. Compartmental signal modulation:  
22 Endosomal phosphatidylinositol 3-phosphate controls endosome morphology and selective cargo sorting.  
23 *Proc Natl Acad Sci U S A*. 103:15473-15478.  
24
- 25 Friedman, J.R., J.R. Dibenedetto, M. West, A.A. Rowland, and G.K. Voeltz. 2013. Endoplasmic reticulum-  
26 endosome contact increases as endosomes traffic and mature. *Mol Biol Cell*. 24:1030-1040.  
27
- 28 Fuglebakk, E., and N. Reuter. 2018. A model for hydrophobic protrusions on peripheral membrane proteins.  
29 *PLoS Comput Biol*. 14:e1006325.  
30
- 31 Funderburk, S.F., Q.J. Wang, and Z. Yue. 2010. The Beclin 1-VPS34 complex--at the crossroads of autophagy  
32 and beyond. *Trends Cell Biol*. 20:355-362.  
33
- 34 Gandhi, A.J., B. Perussia, and H. Goldfine. 1993. *Listeria monocytogenes* phosphatidylinositol (PI)-specific  
35 phospholipase C has low activity on glycosyl-PI-anchored proteins. *J Bacteriol*. 175:8014-8017.  
36
- 37 Gassler, C.S., M. Ryan, T. Liu, O.H. Griffith, and D.W. Heinz. 1997. Probing the roles of active site residues  
38 in phosphatidylinositol-specific phospholipase C from *Bacillus cereus* by site-directed mutagenesis.  
39 *Biochemistry*. 36:12802-12813.  
40
- 41 Gillooly, D.J., I.C. Morrow, M. Lindsay, R. Gould, N.J. Bryant, J.M. Gaullier, R.G. Parton, and H. Stenmark.  
42 2000. Localization of phosphatidylinositol 3-phosphate in yeast and mammalian cells. *EMBO J*. 19:4577-4588.  
43
- 44 Godi, A., A. Di Campli, A. Konstantakopoulos, G. Di Tullio, D.R. Alessi, G.S. Kular, T. Daniele, P. Marra, J.M.  
45 Lucocq, and M.A. De Matteis. 2004. FAPPs control Golgi-to-cell-surface membrane traffic by binding to ARF  
46 and PtdIns(4)P. *Nat Cell Biol*. 6:393-404.  
47
- 48 Godi, A., P. Pertile, R. Meyers, P. Marra, G. Di Tullio, C. Iurisci, A. Luini, D. Corda, and M.A. De Matteis. 1999.  
49 ARF mediates recruitment of PtdIns-4-OH kinase-beta and stimulates synthesis of PtdIns(4,5)P2 on the Golgi  
50 complex. *Nat Cell Biol*. 1:280-287.  
51
- 52 Grabon, A., V.A. Bankaitis, and M.I. McDermott. 2019. The interface between phosphatidylinositol transfer  
53 protein function and phosphoinositide signaling in higher eukaryotes. *J Lipid Res*. 60:242-268.

- 1  
2 Grabon, A., D. Khan, and V.A. Bankaitis. 2015. Phosphatidylinositol transfer proteins and instructive regulation  
3 of lipid kinase biology. *Biochim Biophys Acta*. 1851:724-735.  
4
- 5 Griffith, O.H., and M. Ryan. 1999. Bacterial phosphatidylinositol-specific phospholipase C: structure, function,  
6 and interaction with lipids. *Biochim Biophys Acta*. 1441:237-254.  
7
- 8 Griffith, O.H., J.J. Volwerk, and A. Kuppe. 1991. Phosphatidylinositol-specific phospholipases C from *Bacillus*  
9 *cereus* and *Bacillus thuringiensis*. *Methods Enzymol*. 197:493-502.  
10
- 11 Guo, S., X. Zhang, B.A. Seaton, and M.F. Roberts. 2008. Role of helix B residues in interfacial activation of a  
12 bacterial phosphatidylinositol-specific phospholipase C. *Biochemistry*. 47:4201-4210.  
13
- 14 Guther, M.L., M.L. de Almeida, T.L. Rosenberry, and M.A. Ferguson. 1994. The detection of phospholipase-  
15 resistant and -sensitive glycosyl-phosphatidylinositol membrane anchors by western blotting. *Anal Biochem*.  
16 219:249-255.  
17
- 18 Hammond, G.R., and T. Balla. 2015. Polyphosphoinositide binding domains: Key to inositol lipid biology.  
19 *Biochim Biophys Acta*. 1851:746-758.  
20
- 21 Hammond, G.R., M.J. Fischer, K.E. Anderson, J. Holdich, A. Koteci, T. Balla, and R.F. Irvine. 2012. PI4P and  
22 PI(4,5)P2 are essential but independent lipid determinants of membrane identity. *Science*. 337:727-730.  
23
- 24 Hammond, G.R., M.P. Machner, and T. Balla. 2014. A novel probe for phosphatidylinositol 4-phosphate  
25 reveals multiple pools beyond the Golgi. *J Cell Biol*. 205:113-126.  
26
- 27 Hardeman, D., H.W. Zomer, R.B. Schutgens, J.M. Tager, and H. van den Bosch. 1990. Effect of peroxisome  
28 proliferation on ether phospholipid biosynthesizing enzymes in rat liver. *Int J Biochem*. 22:1413-1418.  
29
- 30 Harkewicz, R., and E.A. Dennis. 2011. Applications of mass spectrometry to lipids and membranes. *Annu Rev*  
31 *Biochem*. 80:301-325.  
32
- 33 Heim, R., D.C. Prasher, and R.Y. Tsien. 1994. Wavelength mutations and posttranslational autoxidation of  
34 green fluorescent protein. *Proc Natl Acad Sci U S A*. 91:12501-12504.  
35
- 36 Heinz, D.W., L.O. Essen, and R.L. Williams. 1998. Structural and mechanistic comparison of prokaryotic and  
37 eukaryotic phosphoinositide-specific phospholipases C. *J Mol Biol*. 275:635-650.  
38
- 39 Heinz, D.W., M. Ryan, T.L. Bullock, and O.H. Griffith. 1995. Crystal structure of the phosphatidylinositol-  
40 specific phospholipase C from *Bacillus cereus* in complex with myo-inositol. *EMBO J*. 14:3855-3863.  
41
- 42 Heinz, D.W., M. Ryan, M.P. Smith, L.H. Weaver, J.F. Keana, and O.H. Griffith. 1996. Crystal structure of  
43 phosphatidylinositol-specific phospholipase C from *Bacillus cereus* in complex with glucosaminyl(alpha 1--  
44 >6)-D-myo-inositol, an essential fragment of GPI anchors. *Biochemistry*. 35:9496-9504.  
45
- 46 Heo, W.D., T. Inoue, W.S. Park, M.L. Kim, B.O. Park, T.J. Wandless, and T. Meyer. 2006. PI(3,4,5)P3 and  
47 PI(4,5)P2 lipids target proteins with polybasic clusters to the plasma membrane. *Science*. 314:1458-1461.  
48
- 49 Holthuis, J.C., and A.K. Menon. 2014. Lipid landscapes and pipelines in membrane homeostasis. *Nature*.  
50 510:48-57.  
51



- 1 Hondal, R.J., Z. Zhao, A.V. Kravchuk, H. Liao, S.R. Riddle, X. Yue, K.S. Bruzik, and M.D. Tsai. 1998.  
2 Mechanism of phosphatidylinositol-specific phospholipase C: a unified view of the mechanism of catalysis.  
3 *Biochemistry*. 37:4568-4580.  
4
- 5 Hsu, F., and Y. Mao. 2015. The structure of phosphoinositide phosphatases: Insights into substrate specificity  
6 and catalysis. *Biochim Biophys Acta*. 1851:698-710.  
7
- 8 Hu, A., X.T. Zhao, H. Tu, T. Xiao, T. Fu, Y. Wang, Y. Liu, X.J. Shi, J. Luo, and B.L. Song. 2018. PIP4K2A  
9 regulates intracellular cholesterol transport through modulating PI(4,5)P2 homeostasis. *J Lipid Res*. 59:507-  
10 514.  
11
- 12 Huang, J., C.J. Mousley, L. Dacquay, N. Maitra, G. Drin, C. He, N.D. Ridgway, A. Tripathi, M. Kennedy, B.K.  
13 Kennedy, W. Liu, K. Baetz, M. Polymenis, and V.A. Bankaitis. 2018. A Lipid Transfer Protein Signaling Axis  
14 Exerts Dual Control of Cell-Cycle and Membrane Trafficking Systems. *Dev Cell*. 44:378-391 e375.  
15
- 16 Huff, J. 2015. The Airyscan detector from ZEISS: confocal imaging with improved signal-to-noise ratio and  
17 super-resolution. *Nat Methods*. 12:i-ii.  
18
- 19 Hung, V., S.S. Lam, N.D. Udeshi, T. Svinkina, G. Guzman, V.K. Mootha, S.A. Carr, and A.Y. Ting. 2017.  
20 Proteomic mapping of cytosol-facing outer mitochondrial and ER membranes in living human cells by proximity  
21 biotinylation. *Elife*. 6.  
22
- 23 Hunyady, L., A.J. Baukal, Z. Gaborik, J.A. Olivares-Reyes, M. Bor, M. Szaszak, R. Lodge, K.J. Catt, and T.  
24 Balla. 2002. Differential PI 3-kinase dependence of early and late phases of recycling of the internalized AT1  
25 angiotensin receptor. *J Cell Biol*. 157:1211-1222.  
26
- 27 Idevall-Hagren, O., and P. De Camilli. 2015. Detection and manipulation of phosphoinositides. *Biochim*  
28 *Biophys Acta*. 1851:736-745.  
29
- 30 Ikezawa, H., and R. Taguchi. 1981. Phosphatidylinositol-specific phospholipase C from *Bacillus cereus* and  
31 *Bacillus thuringiensis*. *Methods in Enzymology*. 71:731-741.  
32
- 33 Jackson, C.L., L. Walch, and J.M. Verbavatz. 2016. Lipids and Their Trafficking: An Integral Part of Cellular  
34 Organization. *Dev Cell*. 39:139-153.  
35
- 36 Jeynov, B., D. Lay, F. Schmidt, S. Tahirovic, and W.W. Just. 2006. Phosphoinositide synthesis and  
37 degradation in isolated rat liver peroxisomes. *FEBS Lett*. 580:5917-5924.  
38
- 39 Kappler, L., J. Li, H.U. Haring, C. Weigert, R. Lehmann, G. Xu, and M. Hoene. 2016. Purity matters: A workflow  
40 for the valid high-resolution lipid profiling of mitochondria from cell culture samples. *Sci Rep*. 6:21107.  
41
- 42 Khan, H.M., T. He, E. Fuglebakk, C. Grauffel, B. Yang, M.F. Roberts, A. Gershenson, and N. Reuter. 2016. A  
43 Role for Weak Electrostatic Interactions in Peripheral Membrane Protein Binding. *Biophys J*. 110:1367-1378.  
44
- 45 Kim, P.K., R.T. Mullen, U. Schumann, and J. Lippincott-Schwartz. 2006. The origin and maintenance of  
46 mammalian peroxisomes involves a de novo PEX16-dependent pathway from the ER. *J Cell Biol*. 173:521-  
47 532.  
48
- 49 Kim, Y.J., M.L. Guzman-Hernandez, and T. Balla. 2011. A highly dynamic ER-derived phosphatidylinositol-  
50 synthesizing organelle supplies phosphoinositides to cellular membranes. *Dev Cell*. 21:813-824.  
51

- 1 Kim, Y.J., M.L. Guzman-Hernandez, E. Wisniewski, and T. Balla. 2015. Phosphatidylinositol-Phosphatidic  
2 Acid Exchange by Nir2 at ER-PM Contact Sites Maintains Phosphoinositide Signaling Competence. *Dev Cell.*  
3 33:549-561.  
4
- 5 Kim, Y.J., M.L. Hernandez, and T. Balla. 2013. Inositol lipid regulation of lipid transfer in specialized membrane  
6 domains. *Trends Cell Biol.* 23:270-278.  
7
- 8 King, C.E., L.R. Stephens, P.T. Hawkins, G.R. Guy, and R.H. Michell. 1987. Multiple metabolic pools of  
9 phosphoinositides and phosphatidate in human erythrocytes incubated in a medium that permits rapid  
10 transmembrane exchange of phosphate. *Biochem J.* 244:209-217.  
11
- 12 Klose, C., M.A. Surma, and K. Simons. 2013. Organellar lipidomics--background and perspectives. *Curr Opin*  
13 *Cell Biol.* 25:406-413.  
14
- 15 Komatsu, T., I. Kukelyansky, J.M. McCaffery, T. Ueno, L.C. Varela, and T. Inoue. 2010. Organelle-specific,  
16 rapid induction of molecular activities and membrane tethering. *Nat Methods.* 7:206-208.  
17
- 18 Krug, M., M.S. Weiss, U. Heinemann, and U. Meuller. 2012. XDSAPP: a graphical user interface for the  
19 convenient processing of diffraction data using XDS. *J Appl Cryst.* 45:568-572.  
20
- 21 Kuppe, A., L.M. Evans, D.A. McMillen, and O.H. Griffith. 1989. Phosphatidylinositol-specific phospholipase C  
22 of *Bacillus cereus*: cloning, sequencing, and relationship to other phospholipases. *J Bacteriol.* 171:6077-6083.  
23
- 24 Lee, A.G. 2003. Lipid-protein interactions in biological membranes: a structural perspective. *Biochim Biophys*  
25 *Acta.* 1612:1-40.  
26
- 27 Lees, J.A., M. Messa, E.W. Sun, H. Wheeler, F. Torta, M.R. Wenk, P. De Camilli, and K.M. Reinisch. 2017.  
28 Lipid transport by TMEM24 at ER-plasma membrane contacts regulates pulsatile insulin secretion. *Science.*  
29 355.  
30
- 31 Lehto, M.T., and F.J. Sharom. 2002. PI-specific phospholipase C cleavage of a reconstituted GPI-anchored  
32 protein: modulation by the lipid bilayer. *Biochemistry.* 41:1398-1408.  
33
- 34 Leigh, A.J., J.J. Volwerk, O.H. Griffith, and J.F. Keana. 1992. Substrate stereospecificity of  
35 phosphatidylinositol-specific phospholipase C from *Bacillus cereus* examined using the resolved enantiomers  
36 of synthetic myo-inositol 1-(4-nitrophenyl phosphate). *Biochemistry.* 31:8978-8983.  
37
- 38 Levine, T.P., and S. Munro. 2002. Targeting of Golgi-specific pleckstrin homology domains involves both  
39 PtdIns 4-kinase-dependent and -independent components. *Curr Biol.* 12:695-704.  
40
- 41 Lewis, K.A., V.R. Garigapati, C. Zhou, and M.F. Roberts. 1993. Substrate requirements of bacterial  
42 phosphatidylinositol-specific phospholipase C. *Biochemistry.* 32:8836-8841.  
43
- 44 Liang, H., S. He, J. Yang, X. Jia, P. Wang, X. Chen, Z. Zhang, X. Zou, M.A. McNutt, W.H. Shen, and Y. Yin.  
45 2014. PTENalpha, a PTEN isoform translated through alternative initiation, regulates mitochondrial function  
46 and energy metabolism. *Cell Metab.* 19:836-848.  
47
- 48 Liang, J., J. Choi, and J. Clardy. 1999. Refined structure of the FKBP12-rapamycin-FRB ternary complex at  
49 2.2 A resolution. *Acta Crystallogr D Biol Crystallogr.* 55:736-744.  
50
- 51 Litvak, V., N. Dahan, S. Ramachandran, H. Sabanay, and S. Lev. 2005. Maintenance of the diacylglycerol  
52 level in the Golgi apparatus by the Nir2 protein is critical for Golgi secretory function. *Nat Cell Biol.* 7:225-234.  
53

- 1 Liu, Z., O. Chen, J.B.J. Wall, M. Zheng, Y. Zhou, L. Wang, H. Ruth Vaseghi, L. Qian, and J. Liu. 2017.  
2 Systematic comparison of 2A peptides for cloning multi-genes in a polycistronic vector. *Sci Rep.* 7:2193.  
3
- 4 Lomize, A.L., I.D. Pogozheva, M.A. Lomize, and H.I. Mosberg. 2007. The role of hydrophobic interactions in  
5 positioning of peripheral proteins in membranes. *BMC Struct Biol.* 7:44.  
6
- 7 Low, M.G., and A.R. Saltiel. 1988. Structural and functional roles of glycosyl-phosphatidylinositol in  
8 membranes. *Science.* 239:268-275.  
9
- 10 Martin, S.F., and A.S. Wagman. 1996. Synthesis and Kinetic Evaluation of Inhibitors of the  
11 Phosphatidylinositol-Specific Phospholipase C from *Bacillus cereus*. *J Org Chem.* 61:8016-8023.  
12
- 13 McCoy, A.J., R.W. Grosse-Kuntzle, P.D. Adams, M.D. Winn, L.C. Storoni, and R.J. Read. 2007. Phaser  
14 crystallographic software. 40:658-674.  
15
- 16 McCrea, H.J., and P. De Camilli. 2009. Mutations in phosphoinositide metabolizing enzymes and human  
17 disease. *Physiology (Bethesda).* 24:8-16.  
18
- 19 Michell, R.H. 1975. Inositol phospholipids and cell surface receptor function. *Biochim Biophys Acta.* 415:81-  
20 47.  
21
- 22 Minogue, S., M.G. Waugh, M.A. De Matteis, D.J. Stephens, F. Berdichevski, and J.J. Hsuan. 2006.  
23 Phosphatidylinositol 4-kinase is required for endosomal trafficking and degradation of the EGF receptor. *J Cell*  
24 *Sci.* 119:571-581.  
25
- 26 Morris, J.C., L. Ping-Sheng, H.X. Zhai, T.Y. Shen, and K. Mensa-Wilmot. 1996. Phosphatidylinositol  
27 phospholipase C is activated allosterically by the aminoglycoside G418. 2-deoxy-2-fluoro-scylo-inositol-1-O-  
28 dodecylphosphonate and its analogs inhibit glycosylphosphatidylinositol phospholipase C. *J Biol Chem.*  
29 271:15468-15477.  
30
- 31 Morris, S.J., H.W. Cook, D.M. Byers, M.W. Spence, and F.B. Palmer. 1990. Phosphoinositide metabolism in  
32 cultured glioma and neuroblastoma cells: subcellular distribution of enzymes indicate incomplete turnover at  
33 the plasma membrane. *Biochim Biophys Acta.* 1022:339-347.  
34
- 35 Moser, J., B. Gerstel, J.E. Meyer, T. Chakraborty, J. Wehland, and D.W. Heinz. 1997. Crystal structure of the  
36 phosphatidylinositol-specific phospholipase C from the human pathogen *Listeria monocytogenes*. *J Mol Biol.*  
37 273:269-282.  
38
- 39 Mueller, U., N. Darowski, M.R. Fuchs, R. Förster, M. Hellmig, K.S. Paithankar, S. Pühringer, M. Steffien, G.  
40 Zocher, and M.S. Weiss. 2012. Facilities for macromolecular crystallography at the Helmholtz-Zentrum Berlin.  
41 *J Synchrotron Radiat.* 19:442-449.  
42
- 43 Nakatsu, F., J.M. Baskin, J. Chung, L.B. Tanner, G. Shui, S.Y. Lee, M. Pirruccello, M. Hao, N.T. Ingolia, M.R.  
44 Wenk, and P. De Camilli. 2012. PtdIns4P synthesis by PI4KIIIalpha at the plasma membrane and its impact  
45 on plasma membrane identity. *J Cell Biol.* 199:1003-1016.  
46
- 47 Nemoto, Y., and P. De Camilli. 1999. Recruitment of an alternatively spliced form of synaptojanin 2 to  
48 mitochondria by the interaction with the PDZ domain of a mitochondrial outer membrane protein. *EMBO J.*  
49 18:2991-3006.  
50
- 51 Panaretou, C., J. Domin, S. Cockcroft, and M.D. Waterfield. 1997. Characterization of p150, an adaptor protein  
52 for the human phosphatidylinositol (PtdIns) 3-kinase. Substrate presentation by phosphatidylinositol transfer  
53 protein to the p150.Ptdins 3-kinase complex. *J Biol Chem.* 272:2477-2485.

- 1  
2 Pasenkiewicz-Gierula, M., K. Baczynski, M. Markiewicz, and K. Murzyn. 2016. Computer modelling studies of  
3 the bilayer/water interface. *Biochim Biophys Acta*. 1858:2305-2321.  
4  
5 Paulus, H., and E.P. Kennedy. 1960. The enzymatic synthesis of inositol monophosphatide. *J Biol Chem*.  
6 235:1303-1311.  
7  
8 Pemberton, J.G., and T. Balla. 2018. Polyphosphoinositide-Binding Domains: Insights from Peripheral  
9 Membrane and Lipid-Transfer Proteins. *Adv Exp Med Biol*.  
10  
11 Pendaries, C., H. Tronchere, M. Plantavid, and B. Payrastre. 2003. Phosphoinositide signaling disorders in  
12 human diseases. *FEBS Lett*. 546:25-31.  
13  
14 Pogozheva, I.D., S. Tristram-Nagle, H.I. Mosberg, and A.L. Lomize. 2013. Structural adaptations of proteins  
15 to different biological membranes. *Biochim Biophys Acta*. 1828:2592-2608.  
16  
17 Poteryaev, D., S. Datta, K. Ackema, M. Zerial, and A. Spang. 2010. Identification of the switch in early-to-late  
18 endosome transition. *Cell*. 141:497-508.  
19  
20 Poussin, M.A., M. Leitges, and H. Goldfine. 2009. The ability of *Listeria monocytogenes* PI-PLC to facilitate  
21 escape from the macrophage phagosome is dependent on host PKCbeta. *Microb Pathog*. 46:1-5.  
22  
23 Pu, M., X. Fang, A.G. Redfield, A. Gershenson, and M.F. Roberts. 2009. Correlation of vesicle binding and  
24 phospholipid dynamics with phospholipase C activity: insights into phosphatidylcholine activation and surface  
25 dilution inhibition. *J Biol Chem*. 284:16099-16107.  
26  
27 Qian, X., C. Zhou, and M.F. Roberts. 1998. Phosphatidylcholine activation of bacterial phosphatidylinositol-  
28 specific phospholipase C toward PI vesicles. *Biochemistry*. 37:6513-6522.  
29  
30 Raiborg, C., E.M. Wenzel, N.M. Pedersen, H. Olsvik, K.O. Schink, S.W. Schultz, M. Vietri, V. Nisi, C. Bucci,  
31 A. Brech, T. Johansen, and H. Stenmark. 2015. Repeated ER-endosome contacts promote endosome  
32 translocation and neurite outgrowth. *Nature*. 520:234-238.  
33  
34 Rink, J., E. Ghigo, Y. Kalaidzidis, and M. Zerial. 2005. Rab conversion as a mechanism of progression from  
35 early to late endosomes. *Cell*. 122:735-749.  
36  
37 Roberts, M.F., H.M. Khan, R. Goldstein, N. Reuter, and A. Gershenson. 2018. Search and Subvert: Minimalist  
38 Bacterial Phosphatidylinositol-Specific Phospholipase C Enzymes. *Chem Rev*. 118:8435-8473.  
39  
40 Rosivatz, E., and R. Woscholski. 2011. Removal or masking of phosphatidylinositol(4,5)bisphosphate from  
41 the outer mitochondrial membrane causes mitochondrial fragmentation. *Cell Signal*. 23:478-486.  
42  
43 Saheki, Y., X. Bian, C.M. Schauder, Y. Sawaki, M.A. Surma, C. Klose, F. Pincet, K.M. Reinisch, and P. De  
44 Camilli. 2016. Control of plasma membrane lipid homeostasis by the extended synaptotagmins. *Nat Cell Biol*.  
45 18:504-515.  
46  
47 Sarkes, D., and L.E. Rameh. 2010. A novel HPLC-based approach makes possible the spatial characterization  
48 of cellular PtdIns5P and other phosphoinositides. *Biochem J*. 428:375-384.  
49  
50 Satori, C.P., M.M. Henderson, E.A. Krautkramer, V. Kostal, M.D. Distefano, and E.A. Arriaga. 2013.  
51 Bioanalysis of eukaryotic organelles. *Chem Rev*. 113:2733-2811.  
52

- 1 Schindelin, J., I. Arganda-Carreras, E. Frise, V. Kaynig, M. Longair, T. Pietzsch, S. Preibisch, C. Rueden, S.  
2 Saalfeld, B. Schmid, J.Y. Tinevez, D.J. White, V. Hartenstein, K. Eliceiri, P. Tomancak, and A. Cardona. 2012.  
3 Fiji: an open-source platform for biological-image analysis. *Nat Methods*. 9:676-682.  
4
- 5 Schink, K.O., K.W. Tan, and H. Stenmark. 2016. Phosphoinositides in Control of Membrane Dynamics. *Annu*  
6 *Rev Cell Dev Biol*. 32:143-171.  
7
- 8 Schon, E.A. 2007. Appendix 5. Gene products present in mitochondria of yeast and animal cells. *Methods*  
9 *Cell Biol*. 80:835-876.  
10
- 11 Scipioni, L., L. Lanzano, A. Diaspro, and E. Gratton. 2018. Comprehensive correlation analysis for super-  
12 resolution dynamic fingerprinting of cellular compartments using the Zeiss Airyscan detector. *Nat Commun*.  
13 9:5120.  
14
- 15 Sharom, F.J., and M.T. Lehto. 2002. Glycosylphosphatidylinositol-anchored proteins: structure, function, and  
16 cleavage by phosphatidylinositol-specific phospholipase C. *Biochem Cell Biol*. 80:535-549.  
17
- 18 Shevchenko, A., and K. Simons. 2010. Lipidomics: coming to grips with lipid diversity. *Nat Rev Mol Cell Biol*.  
19 11:593-598.  
20
- 21 Sicart, A., M. Katan, G. Egea, and E. Sarri. 2015. PLCgamma1 participates in protein transport and  
22 diacylglycerol production triggered by cargo arrival at the Golgi. *Traffic*. 16:250-266.  
23
- 24 Sohn, M., M. Korzeniowski, J.P. Zewe, R.C. Wills, G.R.V. Hammond, J. Humpolickova, L. Vrzal, D. Chalupska,  
25 V. Veverka, G.D. Fairn, E. Boura, and T. Balla. 2018. PI(4,5)P2 controls plasma membrane PI4P and PS  
26 levels via ORP5/8 recruitment to ER-PM contact sites. *J Cell Biol*. 217:1797-1813.  
27
- 28 Subach, O.M., P.J. Cranfill, M.W. Davidson, and V.V. Verkhusha. 2011. An enhanced monomeric blue  
29 fluorescent protein with the high chemical stability of the chromophore. *PLoS One*. 6:e28674.  
30
- 31 Subach, O.M., V.N. Malashkevich, W.D. Zencheck, K.S. Morozova, K.D. Piatkevich, S.C. Almo, and V.V.  
32 Verkhusha. 2010. Structural characterization of acylimine-containing blue and red chromophores in mTagBFP  
33 and TagRFP fluorescent proteins. *Chem Biol*. 17:333-341.  
34
- 35 Suh, B.C., T. Inoue, T. Meyer, and B. Hille. 2006. Rapid chemically induced changes of PtdIns(4,5)P2 gate  
36 KCNQ ion channels. *Science*. 314:1454-1457.  
37
- 38 Szentpetery, Z., G. Szakacs, N. Bojjireddy, A.W. Tai, and T. Balla. 2011. Genetic and functional studies of  
39 phosphatidyl-inositol 4-kinase type IIIalpha. *Biochim Biophys Acta*. 1811:476-483.  
40
- 41 Szentpetery, Z., P. Varnai, and T. Balla. 2010. Acute manipulation of Golgi phosphoinositides to assess their  
42 importance in cellular trafficking and signaling. *Proc Natl Acad Sci U S A*. 107:8225-8230.  
43
- 44 Szymczak, A.L., C.J. Workman, Y. Wang, K.M. Vignali, S. Dilioglou, E.F. Vanin, and D.A. Vignali. 2004.  
45 Correction of multi-gene deficiency in vivo using a single 'self-cleaving' 2A peptide-based retroviral vector. *Nat*  
46 *Biotechnol*. 22:589-594.  
47
- 48 Tanaka, S., J. Nikawa, H. Imai, S. Yamashita, and K. Hosaka. 1996. Molecular cloning of rat  
49 phosphatidylinositol synthase cDNA by functional complementation of the yeast *Saccharomyces cerevisiae*  
50 *pis* mutation. *FEBS Lett*. 393:89-92.  
51
- 52 Ting, A.E., and R.E. Pagano. 1990. Detection of a phosphatidylinositol-specific phospholipase C at the surface  
53 of Swiss 3T3 cells and its potential role in the regulation of cell growth. *J Biol Chem*. 265:5337-5340.

- 1  
2 Toth, J.T., G. Gulyas, D.J. Toth, A. Balla, G.R. Hammond, L. Hunyady, T. Balla, and P. Varnai. 2016. BRET-  
3 monitoring of the dynamic changes of inositol lipid pools in living cells reveals a PKC-dependent PtdIns4P  
4 increase upon EGF and M3 receptor activation. *Biochim Biophys Acta*. 1861:177-187.  
5  
6 Tumanov, S., and J.J. Kamphorst. 2017. Recent advances in expanding the coverage of the lipidome. *Curr*  
7 *Opin Biotechnol*. 43:127-133.  
8  
9 Uster, P.S., and R.E. Pagano. 1986. Synthesis and properties of fluorescent analogs of cytidine diphosphate-  
10 diacylglycerol and phosphatidylinositol. *In Enzymes of Lipid Metabolism II*. L. Freysz et al., editors. Plenum  
11 Press, New York, NY. 493-500.  
12  
13 van Meer, G. 2005. Cellular lipidomics. *EMBO J*. 24:3159-3165.  
14  
15 van Meer, G., and A.I. de Kroon. 2011. Lipid map of the mammalian cell. *J Cell Sci*. 124:5-8.  
16  
17 van Meer, G., D.R. Voelker, and G.W. Feigenson. 2008. Membrane lipids: where they are and how they  
18 behave. *Nat Rev Mol Cell Biol*. 9:112-124.  
19  
20 Vance, J.E. 2015. Phospholipid synthesis and transport in mammalian cells. *Traffic*. 16:1-18.  
21  
22 Varnai, P., G. Gulyas, D.J. Toth, M. Sohn, N. Sengupta, and T. Balla. 2017. Quantifying lipid changes in  
23 various membrane compartments using lipid binding protein domains. *Cell Calcium*. 64:72-82.  
24  
25 Varnai, P., B. Thyagarajan, T. Rohacs, and T. Balla. 2006. Rapidly inducible changes in phosphatidylinositol  
26 4,5-bisphosphate levels influence multiple regulatory functions of the lipid in intact living cells. *J Cell Biol*.  
27 175:377-382.  
28  
29 Varnai, P., B. Toth, D.J. Toth, L. Hunyady, and T. Balla. 2007. Visualization and manipulation of plasma  
30 membrane-endoplasmic reticulum contact sites indicates the presence of additional molecular components  
31 within the STIM1-Orai1 Complex. *J Biol Chem*. 282:29678-29690.  
32  
33 Vinod, T.K., O. Hayes-Griffith, and J.F.W. Keana. 1994. Synthesis of isoteric and isopolar phosphonate  
34 substrate analogues designed as inhibitors for phosphatidylinositol-specific phospholipase C from *Bacillus*  
35 *cereus*. *Tetrahedron Lett*. 35:7193-7196.  
36  
37 Volinia, S., R. Dhand, B. Vanhaesebroeck, L.K. MacDougall, R. Stein, M.J. Zvelebil, J. Domin, C. Panaretou,  
38 and M.D. Waterfield. 1995. A human phosphatidylinositol 3-kinase complex related to the yeast Vps34p-  
39 Vps15p protein sorting system. *EMBO J*. 14:3339-3348.  
40  
41 Volwerk, J.J., P.B. Wetherwax, L.M. Evans, A. Kuppe, and O.H. Griffith. 1989. Phosphatidylinositol-specific  
42 phospholipase C from *Bacillus cereus*: improved purification, amino acid composition, and amino-terminal  
43 sequence. *J Cell Biochem*. 39:315-325.  
44  
45 Wadsworth, S.J., and H. Goldfine. 1999. *Listeria monocytogenes* phospholipase C-dependent calcium  
46 signaling modulates bacterial entry into J774 macrophage-like cells. *Infect Immun*. 67:1770-1778.  
47  
48 Wang, Y.J., J. Wang, H.Q. Sun, M. Martinez, Y.X. Sun, E. Macia, T. Kirchhausen, J.P. Albanesi, M.G. Roth,  
49 and H.L. Yin. 2003. Phosphatidylinositol 4 phosphate regulates targeting of clathrin adaptor AP-1 complexes  
50 to the Golgi. *Cell*. 114:299-310.  
51

- 1 Wei, Z., L.A. Zenewicz, and H. Goldfine. 2005. *Listeria monocytogenes* phosphatidylinositol-specific  
2 phospholipase C has evolved for virulence by greatly reduced activity on GPI anchors. *Proc Natl Acad Sci U*  
3 *S A.* 102:12927-12931.
- 4
- 5 Weixel, K.M., A. Blumental-Perry, S.C. Watkins, M. Aridor, and O.A. Weisz. 2005. Distinct Golgi populations  
6 of phosphatidylinositol 4-phosphate regulated by phosphatidylinositol 4-kinases. *J Biol Chem.* 280:10501-  
7 10508.
- 8
- 9 Wenk, M.R. 2010. Lipidomics: new tools and applications. *Cell.* 143:888-895.
- 10
- 11 Whited, A.M., and A. Johs. 2015. The interactions of peripheral membrane proteins with biological  
12 membranes. *Chem Phys Lipids.* 192:51-59.
- 13
- 14 Williams, R.L., and M. Katan. 1996. Structural views of phosphoinositide-specific phospholipase C: signalling  
15 the way ahead. *Structure.* 4:1387-1394.
- 16
- 17 Williamson, F.A., and D.J. Morre. 1976. Distribution of phosphatidylinositol biosynthetic activities among cell  
18 fractions from rat liver. *Biochem Biophys Res Commun.* 68:1201-1205.
- 19
- 20 Wills, R.C., B.D. Goulden, and G.R.V. Hammond. 2018. Genetically encoded lipid biosensors. *Mol Biol Cell.*  
21 29:1526-1532.
- 22
- 23 Wong, L.H., A.T. Gatta, and T.P. Levine. 2019. Lipid transfer proteins: the lipid commute via shuttles, bridges  
24 and tubes. *Nat Rev Mol Cell Biol.* 20:85-101.
- 25
- 26 Wymann, M.P., and R. Schneider. 2008. Lipid signalling in disease. *Nat Rev Mol Cell Biol.* 9:162-176.
- 27
- 28 Xie, Z., S.K. Hur, L. Zhao, C.S. Abrams, and V.A. Bankaitis. 2018. A Golgi Lipid Signaling Pathway Controls  
29 Apical Golgi Distribution and Cell Polarity during Neurogenesis. *Dev Cell.* 44:725-740 e724.
- 30
- 31 Xu, C., J. Watras, and L.M. Loew. 2003. Kinetic analysis of receptor-activated phosphoinositide turnover. *J*  
32 *Cell Biol.* 161:779-791.
- 33
- 34 Yang, B., M. Pu, H.M. Khan, L. Friedman, N. Reuter, M.F. Roberts, and A. Gershenson. 2015. Quantifying  
35 transient interactions between *Bacillus* phosphatidylinositol-specific phospholipase-C and  
36 phosphatidylcholine-rich vesicles. *J Am Chem Soc.* 137:14-17.
- 37
- 38 Yau, W.M., W.C. Wimley, K. Gawrisch, and S.H. White. 1998. The preference of tryptophan for membrane  
39 interfaces. *Biochemistry.* 37:14713-14718.
- 40
- 41 Zewe, J.P., R.C. Wills, S. Sangappa, B.D. Goulden, and G.R. Hammond. 2018. SAC1 degrades its lipid  
42 substrate PtdIns4P in the endoplasmic reticulum to maintain a steep chemical gradient with donor membranes.  
43 *Elife.* 7.
- 44
- 45 Zhang, L., S. Malik, J. Pang, H. Wang, K.M. Park, D.I. Yule, B.C. Blaxall, and A.V. Smrcka. 2013.  
46 Phospholipase Cepsilon hydrolyzes perinuclear phosphatidylinositol 4-phosphate to regulate cardiac  
47 hypertrophy. *Cell.* 153:216-227.
- 48
- 49 Zhang, X., H. Wehbi, and M.F. Roberts. 2004. Cross-linking phosphatidylinositol-specific phospholipase C  
50 traps two activating phosphatidylcholine molecules on the enzyme. *J Biol Chem.* 279:20490-20500.
- 51
- 52 Zhao, X.H., T. Bondeva, and T. Balla. 2000. Characterization of recombinant phosphatidylinositol 4-kinase  
53 beta reveals auto- and heterophosphorylation of the enzyme. *J Biol Chem.* 275:14642-14648.

- 1
- 2 Zhou, C., X. Qian, and M.F. Roberts. 1997. Allosteric activation of phosphatidylinositol-specific phospholipase
- 3 C: specific phospholipid binding anchors the enzyme to the interface. *Biochemistry*. 36:10089-10097.
- 4
- 5 Zhou, C., Y. Wu, and M.F. Roberts. 1997. Activation of phosphatidylinositol-specific phospholipase C toward
- 6 inositol 1,2-(cyclic)-phosphate. *Biochemistry*. 36:347-355.



## 1 **Figure Legends**

2 **Figure 1. Visualizing the subcellular distribution of PtdIns using the *Bc*PI-PLC scaffold.** (A) Structural  
3 comparison of the *Listeria monocytogenes* (top row, left panel, beige; PDB Accession: 1AOD; Moser et al.,  
4 1997) and *Bacillus cereus* (top row, right panel, green; PDB Accession: 1PTG; Heinz et al., 1995) PI-PLCs  
5 bound to *myo*-inositol. Structural elaborations on the membrane-oriented hydrophobic surface and a general  
6 expansion of PtdIns-binding pocket are highlighted in yellow (top row, center panel: surface rendering of the  
7 binding pocket; bottom row, center panel: ribbon representation of the aligned structures). HEK293-AT1 cells  
8 (10  $\mu$ m scale bars) are shown expressing either the *Listeria* mRFP-PI-PLC (bottom row, left panel) or EGFP-  
9 *Bc*PI-PLC (bottom row, right panel). Please note the clear morphological changes associated with cells  
10 expressing the highly active EGFP-*Bc*PI-PLC, which are rounded and lack well-defined membranous  
11 organelles within the cytosol. (B) Detailed view of the *Bc*PI-PLC active site, highlighting the hydrogen bonding  
12 network involved in coordinating the inositol headgroup (dashed yellow lines) as well as the residues targeted  
13 for mutagenesis throughout this study. In particular, although His32 and His82 are both required for catalysis,  
14 notice that only His32 is directly involved in substrate coordination. A comparison of the localization of the (C)  
15 EGFP-*Bc*PI-PLC<sup>H32A</sup> and (D) EGFP-*Bc*PI-PLC<sup>H82A</sup> mutants are shown in HEK293-AT1 cells. Relative to the  
16 wild-type EGFP-*Bc*PI-PLC, both active site mutations rescue the drastic changes observed in the overall cell  
17 shape, but the EGFP-*Bc*PI-PLC<sup>H82A</sup> construct clearly shows enhanced membrane binding relative to the  
18 EGFP-*Bc*PI-PLC<sup>H32A</sup> mutant.

19  
20 **Figure 2. Mutagenesis of the *Bc*PI-PLC interface limits cytosolic activity by limiting the access to**  
21 **membrane-embedded substrate.** (A) Mutagenesis of hydrophobic residues on the membrane-oriented  
22 surface were designed to disrupt the interfacial penetration of the *Bc*PI-PLC scaffold. A detailed view of the  
23 *Bc*PI-PLC interface is shown (top row, right) with residues Trp47 and Trp242 highlighted (atomic coloring,  
24 yellow spheres; PDB Accession: 1PTG; Heinz et al., 1995). Images from HEK293-AT1 cells (10  $\mu$ m scale  
25 bars) show expression of the wild-type EGFP-*Bc*PI-PLC (low expression; top row, left panel) as well as the  
26 EGFP-*Bc*PI-PLC<sup>W47A</sup> (bottom row, left panel), EGFP-*Bc*PI-PLC<sup>W242A</sup> (bottom row, center panel), and EGFP-  
27 *Bc*PI-PLC<sup>W47AW242A</sup> (*Bc*PI-PLC<sup>AA</sup>; bottom row, right panel) mutants. Compared with the wild-type EGFP-*Bc*PI-  
28 PLC, the single tryptophan mutants are completely cytosolic, but still severely alter the cell morphology.  
29 However, expression of the EGFP-*Bc*PI-PLC<sup>AA</sup> double-mutant shows clear cytosolic localization and almost  
30 no gross alteration to the cell shape; which is indicative of a significant drop in catalytic activity. Now cytosolic,  
31 FKBP-tagging of the *Bc*PI-PLC<sup>AA</sup> scaffold was done to explore the utility of this modified enzyme for acute  
32 recruitment to FRB-labelled membranes. Co-expression of the high-affinity DAG-binding probe (mRFP-  
33 PKDC<sub>1ab</sub>; bottom row), which should reveal any changes in the localization of the PI-PLC hydrolytic product,  
34 is shown in HEK293-AT1 cells (10  $\mu$ m scale bars) with the (B, left panels) mRFP-FKBP-*Bc*PI-PLC<sup>AA</sup> backbone  
35 as well as with mutations that would inactivate (C, center panels; H32A) or modulate (D, right panels; R163A)  
36 the catalytic activity. Relative to the inactive control, the fully active mRFP-FKBP-*Bc*PI-PLC<sup>AA</sup> does show a

1 change in the cytosolic fraction of the PKDC1<sub>ab</sub> probe, as well as the formation of some bright internal puncta.  
2 However, mutagenesis of the active site to FKBP-BcPI-PLC<sup>AA</sup> R163A prevents the gross redistribution of the  
3 DAG sensor.

4  
5 **Figure 3. Acute manipulation of PtdIns content in the ER membrane.** (A) As the biochemically-defined  
6 site of PtdIns synthesis, we examined the co-expression of EGFP-BcPI-PLC<sup>H82A</sup> and an ER marker, consisting  
7 of an mRFP-tagged signal sequence from the ER-resident protein Sac1 (mRFP-Sac1<sub>1-38</sub>), in COS-7 cells (5  
8  $\mu$ m scale bar). An enlarged view of the region identified by the white arrowhead not only shows the localization  
9 of EGFP-BcPI-PLC<sup>H82A</sup> to the ER tubules, but also highlights the relative enrichment of this probe within the  
10 outer mitochondrial membrane and at ER-mitochondria contacts. (B) Schematic depicting rapamycin-induced  
11 recruitment of FKBP-BcPI-PLC<sup>AA</sup> to locally hydrolyze PtdIns to produce membrane-embedded DAG and water  
12 soluble inositol 1-phosphate. In using this methodology, the local production of DAG can be used as a direct  
13 proxy for resting PtdIns content as well as provide information related to the turnover of PtdIns within a  
14 membrane compartment. (C) Time course detailing an example of rapamycin-induced recruitment of the  
15 mRFP-FKBP-BcPI-PLC<sup>AA</sup> R163A variant to the ER using the ER-FRB (mTagBFP2-FRB-CyB5<sub>tail</sub>) recruiter in  
16 HEK293-AT1 cells. (D) DAG production within the cytosolic leaflet of the ER was measured using the ER-  
17 DAG<sup>BRET</sup> biosensor (sLuc-PKDC1<sub>ab</sub>-T2A-mVenus-CyB5A<sub>tail</sub>) in combination with the iRFP-FKBP-BcPI-PLC<sup>AA</sup>  
18 R163A and ER-FRB (mTagBFP2<sup>E215A</sup>-FRB-CyB5<sub>tail</sub>) heterodimerization system. Rapamycin (100 nM) was  
19 added manually after a 4 min baseline BRET measurement, with the post-rapamycin measurement beginning  
20 at ~360s and continuing for 60 min (15 s / cycle). Recruitment of the iRFP-FKBP-BcPI-PLC<sup>AA</sup> R163A, but not  
21 the catalytically inactive iRFP-FKBP-BcPI-PLC<sup>AA</sup> H32A, resulted in the rapid accumulation of DAG within the  
22 ER; which was relatively short-lived and returned to basal levels after roughly 30 min. BRET measurements  
23 were carried out in triplicate wells (HEK293-AT1;  $1 \times 10^5$  cells/well) and repeated in three independent  
24 experiments. BRET ratios were first expressed relative to the baseline BRET measurement and then  
25 rapamycin-treated wells were normalized to the DMSO-treated controls.

26

27 **Figure 4. PtdIns is enriched in the outer mitochondrial membrane.** (A) Localization of EGFP-BcPI-  
28 PLC<sup>H82A</sup> is shown in COS-7 cells loaded with the luminal mitochondrial dye, MitoTracker, using the super-  
29 resolution Airyscan detector (5  $\mu$ m scale bar). An enlarged view of the region identified by the white arrowhead  
30 shows the clear localization of EGFP-BcPI-PLC<sup>H82A</sup> to the membrane surrounding the mitochondrial lumen  
31 and further highlights the enrichment of the probe at ER-mitochondria contacts. (B) DAG production within the  
32 outer mitochondrial membrane was measured using the mito-DAG<sup>BRET</sup> biosensor (AKAP-mVenus-T2A-sLuc-  
33 PKDC1<sub>ab</sub>) in combination with the iRFP-FKBP-BcPI-PLC<sup>AA</sup> R163A and mito-FRB (AKAP-FRB-ECFP<sup>W66A</sup>)  
34 heterodimerization system. (C) Representative images showing the mitochondrial recruiter (mito-FRB, AKAP-  
35 FRB-ECFP; left panel) as well as the initial (center panel) and post-rapamycin (100 nM; right panel) localization  
36 of a selective DAG-binding probe (EGFP-PKDC1<sub>ab</sub>). Together, these data show the rapid accumulation of

1 DAG within the outer membrane of the mitochondria following the acute recruitment of FKBP-*BcPI-PLC<sup>AA</sup>*  
2 *R163A*. (D) PtdIns4P production within the outer mitochondrial membrane was measured using the mito-  
3 PtdIns4P<sup>BRET</sup> biosensor (AKAP-mVenus-T2A-sLuc-P4M<sub>SidM</sub><sup>X2</sup>) in combination with the iRFP-FKBP-PI4KA<sup>ΔN</sup>  
4 and mito-FRB (AKAP-FRB-ECFP<sup>W66A</sup>) heterodimerization system. (E) Representative images showing the  
5 mitochondrial recruiter (AKAP-FRB-ECFP; left panel) as well as the initial (center panel) and post-rapamycin  
6 (100 nM; right panel) localization of a selective PtdIns4P-binding probe (EGFP-P4M<sub>SidM</sub>). The rapid  
7 accumulation of PtdIns4P following the acute recruitment of iRFP-FKBP-PI4KA<sup>ΔN</sup> to the surface of the  
8 mitochondria further supports the conclusion that PtdIns is metabolically available within the outer  
9 mitochondrial membrane. (F) *BcPI-PLC<sup>H82A</sup>* localization to the outer mitochondrial membrane was measured  
10 using the mito-H82A<sup>BRET</sup> biosensor (AKAP-mVenus-T2A-sLuc-*BcPI-PLC<sup>H82A</sup>*) in combination with the iRFP-  
11 FKBP-*BcPI-PLC<sup>AA</sup>* *R163A* and mito-FRB (AKAP-FRB-ECFP<sup>W66A</sup>) heterodimerization system. After an initial  
12 accumulation of the probe, which could be related to compensatory changes in lipid transfer or reflect the  
13 introduction of local packing defects, *BcPI-PLC<sup>H82A</sup>* is rapidly lost from the surface of the mitochondria and  
14 levels eventually cross below the pre-treatment values. (G) Representative images showing the mitochondrial  
15 recruiter (mito-FRB, AKAP-FRB-ECFP; top row, left panel) and the rapid rapamycin-induced (100 nM)  
16 recruitment of the mRFP-FKBP-*BcPI-PLC<sup>AA</sup>* *R163A* enzyme to the outer mitochondrial membrane (top row,  
17 center and right panels). The still images also show the transient accumulation (60s) and eventual loss (600s)  
18 of the EGFP-*BcPI-PLC<sup>H82A</sup>* probe from the surface of the mitochondria. Please note that for each of the  
19 membrane recruitment studies using BRET-based measurements (B, D, and F), rapamycin (100 nM) was  
20 added manually after a 4 min baseline BRET measurement; with the post-rapamycin measurement beginning  
21 at ~360s and continuing for 60 min (15 s / cycle). All measurements were carried out in triplicate wells  
22 (HEK293-AT1; 1x10<sup>5</sup> cells/well) and repeated in three independent experiments. BRET ratios were first  
23 expressed relative to the baseline BRET measurement and then rapamycin-treated wells were normalized to  
24 the DMSO-treated controls.

25

26 **Figure 5. PtdIns is enriched in the cytosolic leaflet of peroxisomes.** (A) Co-expression of EGFP-*BcPI-*  
27 *PLC<sup>H82A</sup>* with the lumenally-targeted mRFP-SKL peroxisome marker, which seems to enlarge the peroxisome  
28 compartment, in COS-7 cells (10 μm scale bar). An enlarged view of the region identified by the white  
29 arrowhead shows the wrapping of the EGFP-*BcPI-PLC<sup>H82A</sup>* around the punctate mRFP-SKL core. (B)  
30 Localization of EGFP-*BcPI-PLC<sup>H82A</sup>* in COS-7 cells co-expressing mRFP-SKL using the super-resolution  
31 Airyscan detector (2.5 μm scale bar). An enlarged view of the EGFP-*BcPI-PLC<sup>H82A</sup>* channel is provided to  
32 highlight the ability to resolve the hollowed core of the signal from the EGFP-*BcPI-PLC<sup>H82A</sup>*, which appears to  
33 envelope the peroxisome puncta (white arrowhead). (C) DAG production within the cytosolic leaflet of the  
34 peroxisomes was measured using the PEX-DAG<sup>BRET</sup> biosensor (PEX-mVenus-T2A-sLuc-PKDC1<sub>ab</sub>) in  
35 combination with the iRFP-FKBP-*BcPI-PLC<sup>AA</sup>* *R163A* and PEX-FRB (PEX3<sub>1-42</sub>-FRB-ECFP<sup>W66A</sup>)  
36 heterodimerization system. Rapamycin (100 nM) was added manually after a 4 min baseline BRET

1 measurement, with the post-rapamycin measurement beginning at ~360s and continuing for 60 min (15 s /  
2 cycle). Measurements were carried out in triplicate wells (HEK293-AT1;  $1 \times 10^5$  cells/well) and repeated in three  
3 independent experiments. BRET ratios were first expressed relative to the baseline BRET measurement and  
4 then rapamycin-treated wells were normalized to the DMSO-treated controls. (D) Representative images  
5 showing the distribution of the peroxisome recruiter (PEX-FRB, PEX3<sub>1-42</sub>-FRB-ECFP) and the rapid  
6 rapamycin-induced (100 nM) recruitment of the mRFP-FKBP-*BcPI-PLC<sup>AA</sup>* R163A enzyme to the peroxisomes  
7 (left panels). Overall, the BRET-based measurements show a rapid and sustained accumulation of DAG on  
8 the surface of peroxisomes following the acute recruitment of FKBP-*BcPI-PLC<sup>AA</sup>* R163A; however, only minor  
9 changes in the localization of the DAG probe (EGFP-PKDC1<sub>ab</sub>; right panels), including the transient formation  
10 of cytosolic puncta, were seen by confocal microscopy using HEK293-AT1 cells.

11

12 **Figure 6. PtdIns is enriched at the Golgi Complex.** Co-expression of EGFP-*BcPI-PLC<sup>H82A</sup>* in COS-7 cells  
13 (5  $\mu$ m scale bar) with an integral Golgi-localized membrane protein (A; FRB-mCherry-Giantin<sub>tail</sub>) or the Arf1-  
14 and PtdIns4P-sensitive pleckstrin homology (PH) domain of FAPP1 (B; FAPP1<sub>PH</sub>-EGFP). An enlarged view  
15 of the regions identified by the white arrowheads not only shows the clear co-localization of EGFP-*BcPI-*  
16 *PLC<sup>H82A</sup>* with markers of the Golgi complex, but also highlights the specific enrichment of these labels,  
17 sometimes independent of one another, within the perinuclear Golgi region. Of particular interest is the  
18 concentration of the FAPP1<sub>PH</sub> domain within peripheral puncta at the edges of the Golgi complex in regions  
19 that appear to be distinct from those labeled with the EGFP-*BcPI-PLC<sup>H82A</sup>* probe. (C) DAG production within  
20 the Golgi complex was measured using the Golgi-DAG<sup>BRET</sup> biosensor (sLuc-PKDC1<sub>ab</sub>-T2A-mVenus-Giantin<sub>tail</sub>)  
21 in combination with the iRFP-FKBP-*BcPI-PLC<sup>AA</sup>* R163A and FRB-Golgi (ECFP<sup>W66A</sup>-FRB-Giantin<sub>tail</sub>)  
22 heterodimerization system. Rapamycin (100 nM) was added manually after a 4 min baseline BRET  
23 measurement, with the post-rapamycin measurement beginning at ~360s and continuing for 60 min (15 s /  
24 cycle). Recruitment of the catalytically active iRFP-FKBP-*BcPI-PLC<sup>AA</sup>* R163A, but not the inactive iRFP-FKBP-  
25 *BcPI-PLC<sup>AA</sup>* H32A, resulted in the sustained accumulation of DAG within the cytosolic leaflet of the Golgi  
26 complex. All measurements were carried out in triplicate wells (HEK293-AT1;  $1 \times 10^5$  cells/well) and repeated  
27 in three independent experiments. BRET ratios were first expressed relative to the baseline BRET  
28 measurement and then rapamycin-treated wells were normalized to the DMSO-treated controls. (D)  
29 Representative images showing the Golgi membrane recruiter (FRB-Golgi, ECFP-FRB-Giantin<sub>tail</sub>) and the  
30 rapamycin-induced (100 nM) recruitment of the mRFP-FKBP-*BcPI-PLC<sup>AA</sup>* R163A enzyme to the Golgi  
31 complex (top row). The still images show the sustained accumulation of DAG (EGFP-PKDC1<sub>ab</sub>) on the surface  
32 of the Golgi complex (bottom row). (E) Importantly, as shown in the representative images, recruitment of the  
33 inactive enzyme (FKBP-*BcPI-PLC<sup>AA</sup>* H32A) to the Golgi complex (left panels) did not alter the localization of  
34 the EGFP-PKDC1<sub>ab</sub> probe (right panels).

35

1 **Figure 7. PtdIns4P levels at the Golgi complex are sensitive to the local availability of PtdIns.** Pooled  
2 image analyses of (A and C) EGFP-*BcPI-PLC<sup>H82A</sup>* or (E and G) FAPP1<sub>PH</sub>-EGFP levels in the perinuclear Golgi  
3 region following recruitment of mRFP-FKBP-*BcPI-PLC<sup>AA</sup>* R163A (37 cells, FRB-Golgi + EGFP-*BcPI-PLC<sup>H82A</sup>*;  
4 27 cells, FRB-ER + EGFP-*BcPI-PLC<sup>H82A</sup>*; 46 cells, FRB-Golgi + FAPP1<sub>PH</sub>-EGFP; 42 cells, FRB-ER +  
5 FAPP1<sub>PH</sub>-EGFP), mRFP-FKBP-*BcPI-PLC<sup>AA</sup>* (14 cells, FRB-Golgi + EGFP-*BcPI-PLC<sup>H82A</sup>*; 16 cells, FRB-ER +  
6 EGFP-*BcPI-PLC<sup>H82A</sup>*; 16 cells, FRB-Golgi + FAPP1<sub>PH</sub>-EGFP; 21 cells, FRB-ER + FAPP1<sub>PH</sub>-EGFP), or mRFP-  
7 FKBP-*BcPI-PLC<sup>AA</sup>* H32A (32 cells, FRB-Golgi + EGFP-*BcPI-PLC<sup>H82A</sup>*; 27 cells, FRB-ER + EGFP-*BcPI-*  
8 *PLC<sup>H82A</sup>*; 43 cells, FRB-Golgi + FAPP1<sub>PH</sub>-EGFP; 42 cells, FRB-ER + FAPP1<sub>PH</sub>-EGFP) either directly to the  
9 surface of the Golgi complex (A and E; FRB-Golgi, ECFP-FRB-Giantin<sub>tail</sub>) or indirectly to the site of PtdIns  
10 synthesis in the ER (C and G; FRB-ER, mTagBFP2-FRB-CyB5<sub>tail</sub>). Overall, results show the rapid depletion  
11 of FAPP1<sub>PH</sub>-EGFP at the Golgi complex following the recruitment of either FKBP-*BcPI-PLC<sup>AA</sup>* or the R163A  
12 variant to both the Golgi complex or to the ER. Direct recruitment of the FKBP-*BcPI-PLC<sup>AA</sup>* variants to the  
13 Golgi did not deplete EGFP-*BcPI-PLC<sup>H82A</sup>* from the surface of the Golgi complex, however both the FKBP-  
14 *BcPI-PLC<sup>AA</sup>* and R163A variant were able to rapidly drop EGFP-*BcPI-PLC<sup>H82A</sup>* levels in the perinuclear Golgi  
15 region when recruited to the ER. For each treatment using the active FKBP-*BcPI-PLC<sup>AA</sup>* or R163A enzymes,  
16 images of representative cells are shown with the resulting post-rapamycin (100nM) enzyme recruitment (right  
17 panel) as well as the initial (center panel) and final (left panel) localization of the EGFP-*BcPI-PLC<sup>H82A</sup>* or  
18 FAPP1<sub>PH</sub>-EGFP probes following 20 min of spatially-restricted PtdIns hydrolysis. Alternatively, each quantified  
19 graph shows the normalized intensities ( $F_{(t)}/F_{pre}$ ) of the EGFP-*BcPI-PLC<sup>H82A</sup>* or FAPP1<sub>PH</sub>-EGFP signals at the  
20 perinuclear Golgi region, shown relative to the cytosol, following treatment with rapamycin (100nM) using  
21 HEK293-AT1 cells. Data from these image analyses (A, C, E, and G) are presented as mean values  $\pm$  SEM  
22 from a minimum of four independent experiment. The pre-treatment period used for normalization was defined  
23 as the average ratio of the Golgi:cytosolic signal measured over the first 4 frames of each recording, prior to  
24 rapamycin addition.

25

26 **Figure 8. The steady-state levels of PtdIns are low within the PM.** (A) Co-expression of EGFP-*BcPI-*  
27 *PLC<sup>H82A</sup>* with the unbiased PtdIns4P-binding probe, mCherry-P4M<sub>SidM</sub>, in HEK293-AT1 cells (10  $\mu$ m scale bar).  
28 Despite the co-localization of EGFP-*BcPI-PLC<sup>H82A</sup>* with the PtdIns4P pool labelled by mCherry-P4M<sub>SidM</sub> at the  
29 Golgi complex, an enlarged view of the region identified by the white arrowhead clearly shows that the *BcPI-*  
30 *PLC<sup>H82A</sup>* probe does not localize to the PM. (B) PtdIns4P production in the PM was measured using the PM-  
31 PtdIns4P<sup>BRET</sup> biosensor (L<sub>10</sub>-mVenus-T2A-sLuc-P4M<sub>SidM</sub><sup>X2</sup>) together with the iRFP-FKBP-PI4KA<sup>ΔN</sup> and PM-  
32 FRB (PM2-FRB-ECFP<sup>W66A</sup>) heterodimerization system. Consistent with a low resting availability of PtdIns  
33 within this compartment, recruitment of FKBP-PI4KA<sup>ΔN</sup> did not alter the PM levels of PtdIns4P. (C) *BcPI-*  
34 *PLC<sup>H82A</sup>* levels within the PM were measured using the PM-H82A<sup>BRET</sup> biosensor (L<sub>10</sub>-mVenus-T2A-sLuc-*BcPI-*  
35 *PLC<sup>H82A</sup>*) in combination with the multicistronic L<sub>10</sub>-FRB-T2A-mRFP-FKBP-Pseudojanin heterodimerization  
36 system. Relative to both the baseline and the inactive control (L<sub>10</sub>-FRB-T2A-mRFP-FKBP-Pseudojanin<sup>DEAD</sup>),

1 recruitment of FKBP-Pseudojanin, which possesses both 4- and 5-position PPI<sub>n</sub> phosphatase activities,  
2 caused an acute increase of *BcPI-PLC<sup>H82A</sup>* levels within the PM. These data are consistent with a localized  
3 production of PtdIns following the targeted dephosphorylation of the resident PPI<sub>n</sub> species, PtdIns4P and  
4 PtdIns(4,5)P<sub>2</sub>. (D) Given the need for sustained PPI<sub>n</sub> production of within the PM, we hypothesized that local  
5 delivery of PtdIns would be intimately tied to PI4KA activity and that PtdIns would accumulate within the PM if  
6 its rapid conversion to PtdIns4P is prevented. Acute inhibition of PI4KA activity using the selective inhibitor  
7 GSK-A1 (100 nM) caused the rapid loss of mCherry-P4M<sub>SidM</sub> from the PM after 20-30 min and also resulted  
8 in the uniform accumulation of EGFP-*BcPI-PLC<sup>H82A</sup>* within the PM of HEK293-AT1 cells after roughly 180-240  
9 min. (E) Kinetic analysis using the PM-H82A<sup>BRET</sup> biosensor (L<sub>10</sub>-mVenus-T2A-sLuc-*BcPI-PLC<sup>H82A</sup>*) revealed a  
10 dose-dependent increase in the PM levels of *BcPI-PLC<sup>H82A</sup>* following treatment with GSK-A1. (F) DAG  
11 production in the PM was measured using the PM-DAG<sup>BRET</sup> biosensor (L<sub>10</sub>-mVenus-T2A-sLuc-PKDC1<sub>ab</sub>) in  
12 combination with the iRFP-FKBP-*BcPI-PLC<sup>AA</sup>* R163A and PM-FRB (PM2-FRB-ECFP<sup>W66A</sup>) heterodimerization  
13 system. Consistent with the inability to locally produce PtdIns4P within the PM using the FKBP-PI4KA<sup>ΔN</sup>,  
14 recruitment of the FKBP-*BcPI-PLC<sup>AA</sup>* R163A failed to elicit a major change in local DAG levels. However, pre-  
15 treatment of cells with GSK-A1 (100 nM) for 30 min resulted in a large increase in DAG production within the  
16 PM in response to recruitment of the FKBP-*BcPI-PLC<sup>AA</sup>* R163A; consistent with an marked increase in PtdIns  
17 availability following the inhibition of PtdIns conversion to PtdIns4P by the PM-localized PI4KA. Please note  
18 that for each of the BRET experiments shown (B, C, E, and F), drug treatments were added manually after a  
19 4 min baseline BRET measurement; with the post-application measurements beginning at ~360s and  
20 continuing for 60 min (15 s / cycle). All measurements were carried out in triplicate wells (HEK293-AT1; 1x10<sup>5</sup>  
21 cells/well) and repeated in three independent experiments. BRET ratios were first expressed relative to the  
22 baseline BRET measurement and then treated wells were normalized to the drug vehicle controls.

23

24 **Figure 9. PtdIns delivered to the PM is channeled towards PPI<sub>n</sub> production.** (A) PtdIns4P and (D)  
25 PtdIns(4,5)P<sub>2</sub> levels in the PM were measured using the PM-PtdIns4P<sup>BRET</sup> (L<sub>10</sub>-mVenus-T2A-sLuc-P4M<sub>SidM</sub><sup>X2</sup>)  
26 or PM-PtdIns(4,5)P<sub>2</sub><sup>BRET</sup> (L<sub>10</sub>-mVenus-T2A-sLuc-PLCδ1<sub>PH</sub>) biosensors in response to recruitment of iRFP-  
27 FKBP-*BcPI-PLC<sup>AA</sup>* R163A either directly to the PM (PM-FRB, PM2-FRB-ECFP<sup>W66A</sup>) or indirectly to the site of  
28 PtdIns synthesis within the ER (FRB-ER, mTagBFP2<sup>E215A</sup>-FRB-CyB5<sub>tail</sub>). Treatment with GSK-A1 (100 nM),  
29 which selectively inhibits PI4KA, or angiotensin-II (AngII; 100 nM) are included as positive controls for the PM-  
30 PtdIns4P<sup>BRET</sup> and PM-PtdIns(4,5)P<sub>2</sub><sup>BRET</sup> biosensors, respectively, as well as to provide scale for any changes  
31 to PPI<sub>n</sub> levels that are associated with the membrane recruitment of FKBP-*BcPI-PLC<sup>AA</sup>* R163A. Images of  
32 representative cells are shown with the resulting post-rapamycin (100 nM) enzyme recruitment to the PM (right  
33 panels; B, PtdIns4P; E, PtdIns(4,5)P<sub>2</sub>) or ER (right panels; C, PtdIns4P; F, PtdIns(4,5)P<sub>2</sub>), as well as the initial  
34 (center panels) and final (left panels) localization of the established EGFP-P4M<sub>SidM</sub><sup>X2</sup> (B and C) or PLCδ1<sub>PH</sub>-  
35 EGFP (E and F) probes following 20 min of localized PtdIns hydrolysis. Although direct recruitment of FKBP-  
36 *BcPI-PLC<sup>AA</sup>* R163A to the PM did not alter PPI<sub>n</sub> levels, ER recruitment resulted in the selective depletion of

1 PtdIns4P, but not PtdIns(4,5)P<sub>2</sub>, within the PM. These data suggests that PtdIns delivery is efficiently  
2 channeled towards PI4P production and, as shown previously, that PtdIns4P and PtdIns(4,5)P<sub>2</sub> levels can be  
3 uncoupled from one another within the PM. Kinetic analyses of *BcPI-PLC<sup>H82A</sup>* (G and H; PM-H82A<sup>BRET</sup>; L<sub>10</sub>-  
4 mVenus-T2A-sLuc-*BcPI-PLC<sup>H82A</sup>*), PtdIns4P (H; PM-PtdIns4P<sup>BRET</sup>; L<sub>10</sub>-mVenus-T2A-sLuc-P4M<sub>SidM</sub><sup>X2</sup>) and  
5 PtdIns(4,5)P<sub>2</sub> (H; PM-PtdIns(4,5)P<sub>2</sub><sup>BRET</sup>; L<sub>10</sub>-mVenus-T2A-sLuc-PLCδ1<sub>PH</sub>) levels within the PM were  
6 measured after treatment with AngII (100 nM). Acute stimulation of receptor-mediated PtdIns(4,5)P<sub>2</sub> hydrolysis  
7 is associated with a minor and transient increase of *BcPI-PLC<sup>H82A</sup>* within the PM that is followed by a decrease  
8 in total *BcPI-PLC<sup>H82A</sup>* levels, which likely reflects the net consumption of PtdIns during sustained receptor  
9 activation and the subsequent re-synthesis of PPI species. (I) Given the role of interfacial activation for  
10 membrane binding, representative images showing the localization of the EGFP-*BcPI-PLC<sup>H82A</sup>* (left panels)  
11 and mRFP-PKDC1<sub>ab</sub> (right panels) probes in response to stimulation with AngII (100 nM) are shown. Despite  
12 the massive increase in the PM levels of DAG (red inset, right), a coordinate accumulation of *BcPI-PLC<sup>H82A</sup>* is  
13 not observed (red inset, left), which supports an important role for membrane PtdIns content, rather than DAG  
14 production or changes to membrane packing in isolation, for the localization of the *BcPI-PLC<sup>H82A</sup>* probe. Please  
15 note that for each of the BRET experiments shown (A, D, G, and H), drug treatments were added manually  
16 after a 4 min baseline BRET measurement; with the post-application measurements beginning at ~360s and  
17 continuing for 60 min (15 s / cycle). All measurements were carried out in triplicate wells (HEK293-AT1; 1x10<sup>5</sup>  
18 cells/well) and repeated in three independent experiments. BRET ratios were first expressed relative to the  
19 baseline BRET measurement and then treated wells were normalized to the vehicle-alone controls.  
20 Additionally, to facilitate direct comparisons between the (A) PtdIns4P and (D) PtdIns(4,5)P<sub>2</sub> measurements  
21 made in response to either PM or ER recruitment of FKBP-*BcPI-PLC<sup>AA</sup>* R163A, values obtained from the  
22 recruitment of the active enzyme were also normalized to control measurements made simultaneously using  
23 the catalytically-inactive FKBP-*BcPI-PLC<sup>AA</sup>* H32A variant.

24

25 **Figure 10. PtdIns3P levels in Rab5- and Rab7-positive endosomes are maintained by the delivery of**  
26 **PtdIns from the ER.** Co-expression of the EGFP-*BcPI-PLC<sup>H82A</sup>* probe with either (A) mCherry-Rab5<sup>WT</sup> or (D)  
27 mCherry-Rab7<sup>WT</sup> in HEK293-AT1 cells (5 μm scale bars). Enlarged views of the regions identified by the white  
28 arrowheads shows the relative absence of the EGFP-*BcPI-PLC<sup>H82A</sup>* probe from Rab5- or Rab7-labelled  
29 vesicles; although intimate contacts between Rab-positive compartments and the tubular ER are apparent.  
30 DAG production within the (B) Rab5- or (E) Rab7-labelled endosomal compartments were measured using  
31 the Rab5-DAG<sup>BRET</sup> (sLuc-PKDC1<sub>ab</sub>-T2A-mVenus-Rab5) or Rab7-DAG<sup>BRET</sup> (sLuc-PKDC1<sub>ab</sub>-T2A-mVenus-  
32 Rab7) biosensors in combination with iRFP-FKBP-*BcPI-PLC<sup>AA</sup>* R163A and either the iRFP-FRB-Rab5 or  
33 iRFP-FRB-Rab7 recruiters, respectively. Recruitment of FKBP-*BcPI-PLC<sup>AA</sup>* R163A to the Rab5 compartment  
34 resulted in only a minor elevation of local DAG levels, whereas recruitment to the Rab7-labelled endosomes  
35 caused a more substantial increase in DAG production. Kinetic analyses of PtdIns3P levels within the Rab5  
36 (C; Rab5-PtdIns3P<sup>BRET</sup>; sLuc-FYVE<sub>Hrs</sub><sup>X2</sup>-T2A-mVenus-Rab5) and Rab7 (F; Rab7-PtdIns3P<sup>BRET</sup>; sLuc-

1 FYVE<sub>Hrs</sub><sup>X2</sup>-T2A-mVenus-Rab7) compartments are shown in response to the recruitment of iRFP-FKBP-*BcPI*-  
2 PLC<sup>AA</sup> R163A either directly to the surface of endosomes (C, iRFP-FRB-Rab5; F, iRFP-FRB-Rab7) or  
3 indirectly to the site of PtdIns synthesis within the ER (FRB-ER, mTagBFP2<sup>E215A</sup>-FRB-CyB5<sub>tail</sub>). Treatment  
4 with the selective class III PtdIns 3-kinase inhibitor VPS34-IN1 (300 nM) is included as both a positive control  
5 for the Rab5-PtdIns3P<sup>BRET</sup> and Rab7-PtdIns3P<sup>BRET</sup> biosensors, as well as to provide scale for the magnitude  
6 of any changes in PtdIns3P levels associated with acute recruitment of FKBP-*BcPI*-PLC<sup>AA</sup> R163A. Overall,  
7 direct recruitment of FKBP-*BcPI*-PLC<sup>AA</sup> R163A to the surface of endosomes resulted in only minor changes  
8 to local PtdIns3P levels, while ER recruitment of the active enzyme resulted in a much more substantial  
9 decrease in endosomal PtdIns3P contents. Please note that for each of the membrane recruitment studies  
10 shown using BRET-based measurements (B, C, E, and F), rapamycin (100 nM) was added manually after a  
11 4 min baseline BRET measurement; with the post-rapamycin measurements beginning at ~360s and  
12 continuing for 60 min (15 s / cycle). All measurements were carried out in triplicate wells (HEK293-AT1; 1x10<sup>5</sup>  
13 cells/well) and repeated in three independent experiments. BRET ratios were first expressed relative to the  
14 baseline BRET measurement and then rapamycin-treated wells were normalized to the DMSO-treated  
15 controls. Additionally, to facilitate direct comparisons between the (C) Rab5- and (F) Rab7-associated  
16 measurements of the PtdIns3P levels made in response to either PM or ER recruitment of the FKBP-*BcPI*-  
17 PLC<sup>AA</sup> R163A enzyme, values obtained from recruitment of the active enzyme were also normalized to control  
18 measurements made simultaneously using the catalytically-inactive FKBP-*BcPI*-PLC<sup>AA</sup> H32A variant.



1 **Supplemental Figure S1.**

2 (A) Structural comparison of the *BcPI-PLC* (gold; PDB Accession: 1PTG; Heinz et al., 1995) and the *BcPI-*  
3 *PLC*<sup>H82A</sup> mutant bound to *myo*-inositol. The threaded alignment of the two structures shows no major  
4 alterations to the overall protein architecture and only minor changes in the orientation of a few amino acid  
5 side chains were observed. (B) Enlarged view of the *BcPI-PLC*<sup>H82A</sup> active site, with residues involved in  
6 coordinating the *myo*-inositol headgroup highlighted. (C) Electron density map surrounding the *myo*-inositol  
7 headgroup within the *BcPI-PLC*<sup>H82A</sup> active site; please note the intact coordination of the inositol ring.

8

9 **Supplemental Figure S2.**

10 (A) Comparison of the subcellular localization of the EGFP-*BcPI-PLC*<sup>H82A</sup> probe in the COS-7, HEK293-AT1,  
11 and HT-1080 cell lines. (B) Co-expression of EGFP-*BcPI-PLC*<sup>H82A</sup> and the mRFP-tagged signal sequence  
12 from the ER-resident protein Sac1 (mRFP-Sac1<sub>1-38</sub>), in HT-1080 cells. (C) Localization of EGFP-*BcPI-PLC*<sup>H82A</sup>  
13 is shown in HEK293-AT1 (top row) and COS-7 cells (bottom row; super-resolution Airyscan detector) loaded  
14 with the luminal mitochondrial dye, MitoTracker. In general, the steady-state membrane distributions of  
15 EGFP-*BcPI-PLC*<sup>H82A</sup> were consistent across representative mammalian cell lines and revealed the clear  
16 association of the probe with membranes of the ER, mitochondria, and Golgi complex. EGFP-*BcPI-PLC*<sup>H82A</sup>  
17 also did not localize to the PM or to endosomal compartments in the cell lineages examined.

18

19 **Supplemental Figure S3.**

20 (A) Schematic depicting the use of FRB-tagged membrane anchors to rapidly recruit the FKBP-*BcPI-PLC*<sup>AA</sup>  
21 scaffold to the surface of specific organelles in close proximity to the PtdIns substrate upon acute treatment  
22 with rapamycin. Importantly, the rationale mutagenesis of two interfacial tryptophan residues (W47A/W242A;  
23 <sup>AA</sup>) make the resulting FKBP-*BcPI-PLC*<sup>AA</sup> enzyme entirely cytosolic, thereby significantly preventing interfacial  
24 activation of the enzymatic activity from the cytosol. However, in hopes of further tuning the catalytic activity  
25 of the parent FKBP-*BcPI-PLC*<sup>AA</sup> scaffold, we screened the activities of mutants with an alanine substitution or  
26 conservative mutagenesis of either Arg163 (R163A and R163K; Fig.S3B) or Tyr200 (Y200A and Y200F;  
27 Fig.S3C) using the compartment-selective mito-DAG<sup>BRET</sup> biosensor (AKAP-mVenus-T2A-sLuc-PKDC1<sub>ab</sub>) in  
28 combination with a mitochondria-targeted recruiter (AKAP-FRB-ECFP<sup>W66A</sup>). While each of these mutants  
29 showed slightly altered kinetics in the DAG-production observed after enzyme recruitment, the rapid initial  
30 peak observed for the FKBP-*BcPI-PLC*<sup>AA</sup> R163A, R163K, and Y200F variants suggested a minimized  
31 consumption of PtdIns by the mutant enzymes before membrane recruitment. To allow for direct comparisons,  
32 please note that the pooled response associated with the DAG production stimulated by the parent FKBP-  
33 *BcPI-PLC*<sup>AA</sup> scaffold is included in both the (B) and (C) panels.

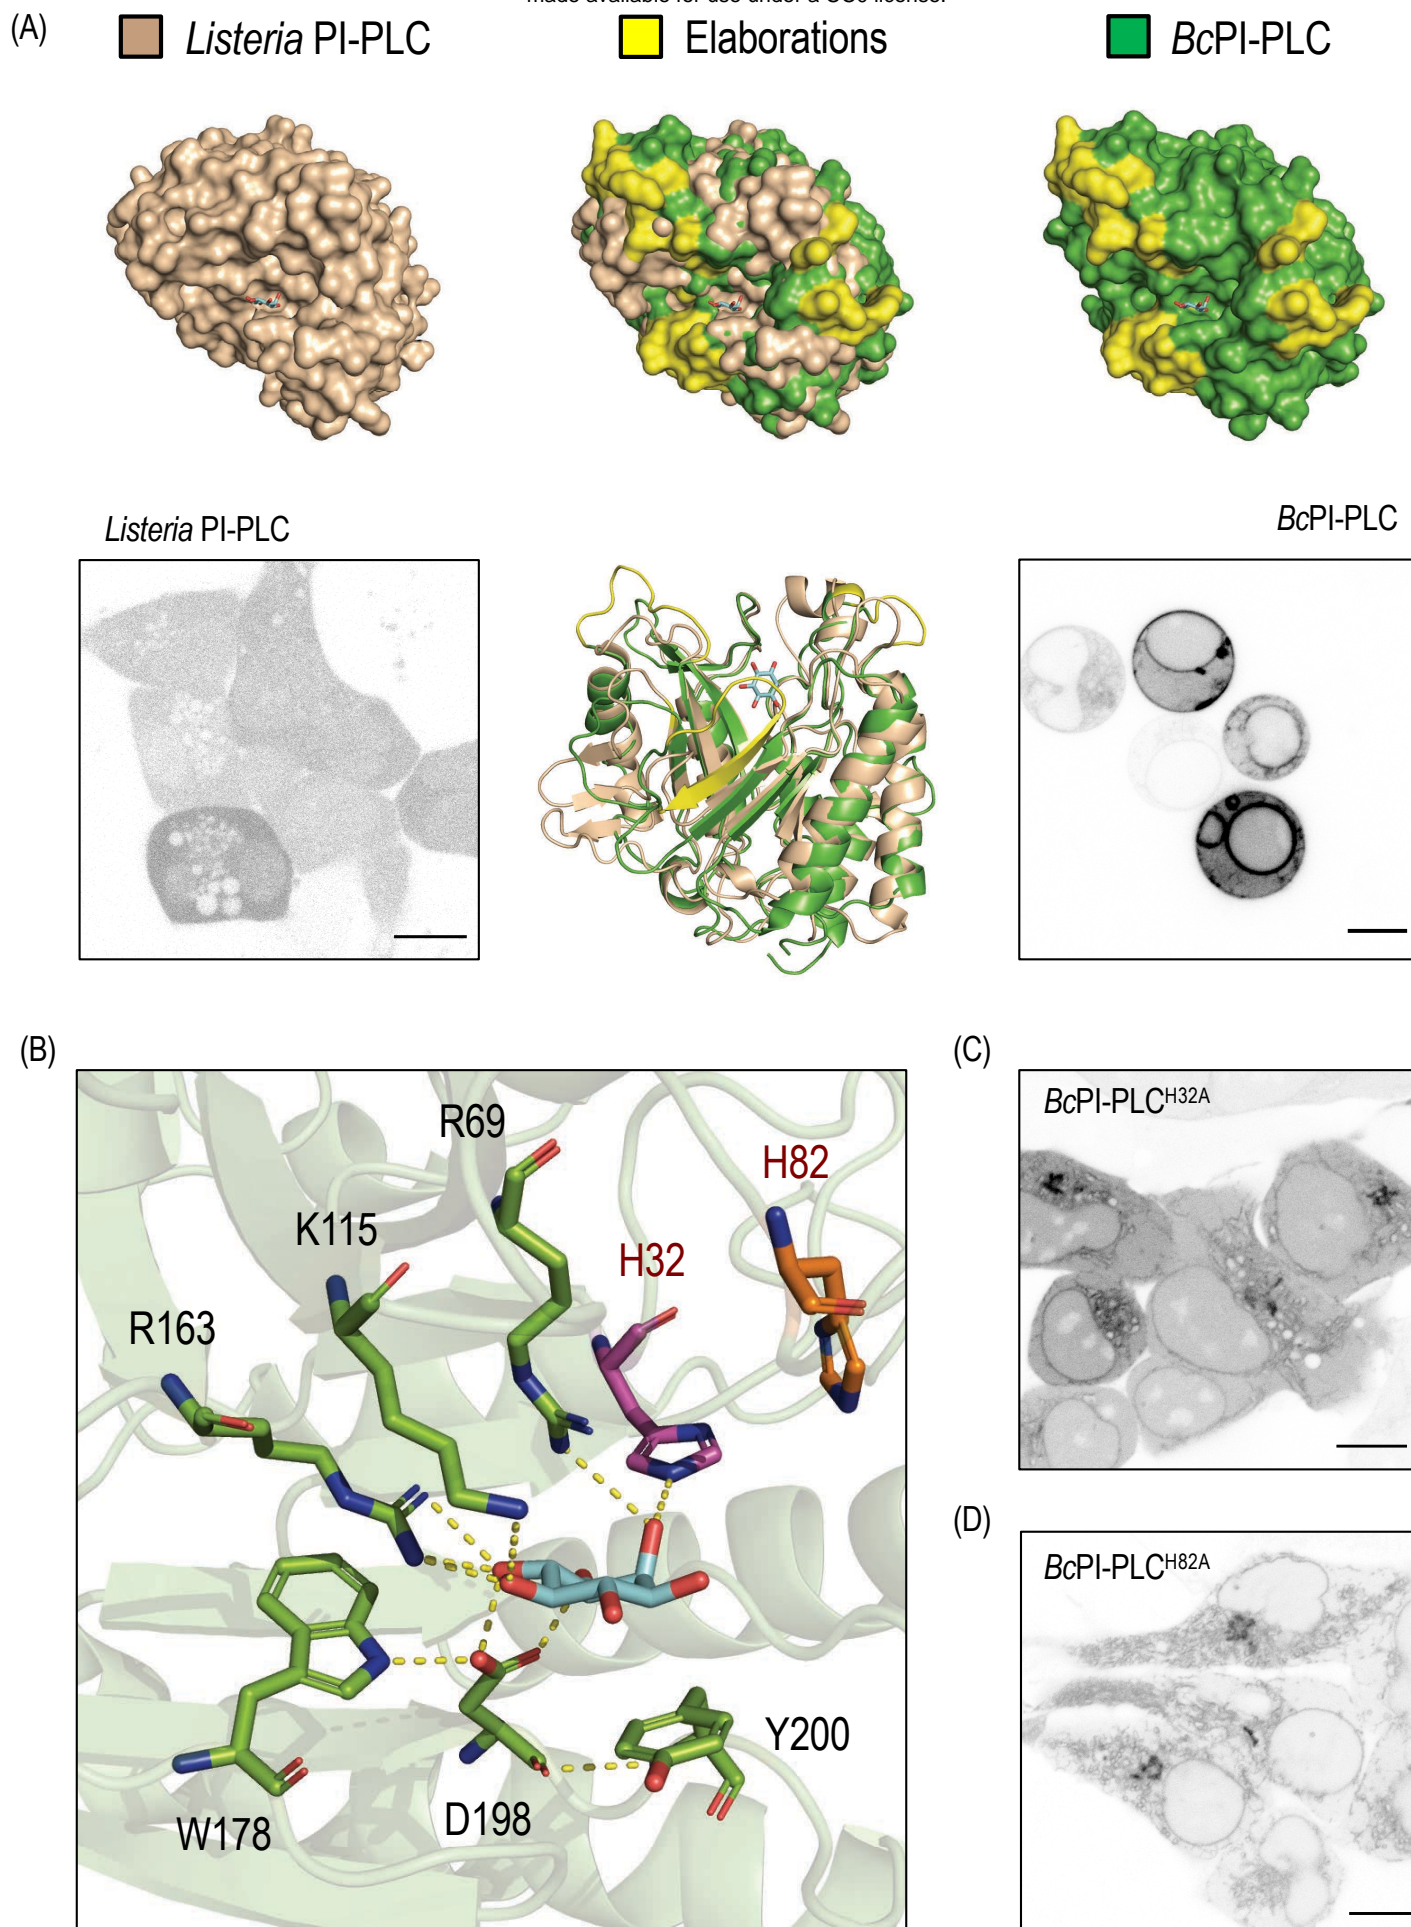

Figure 1

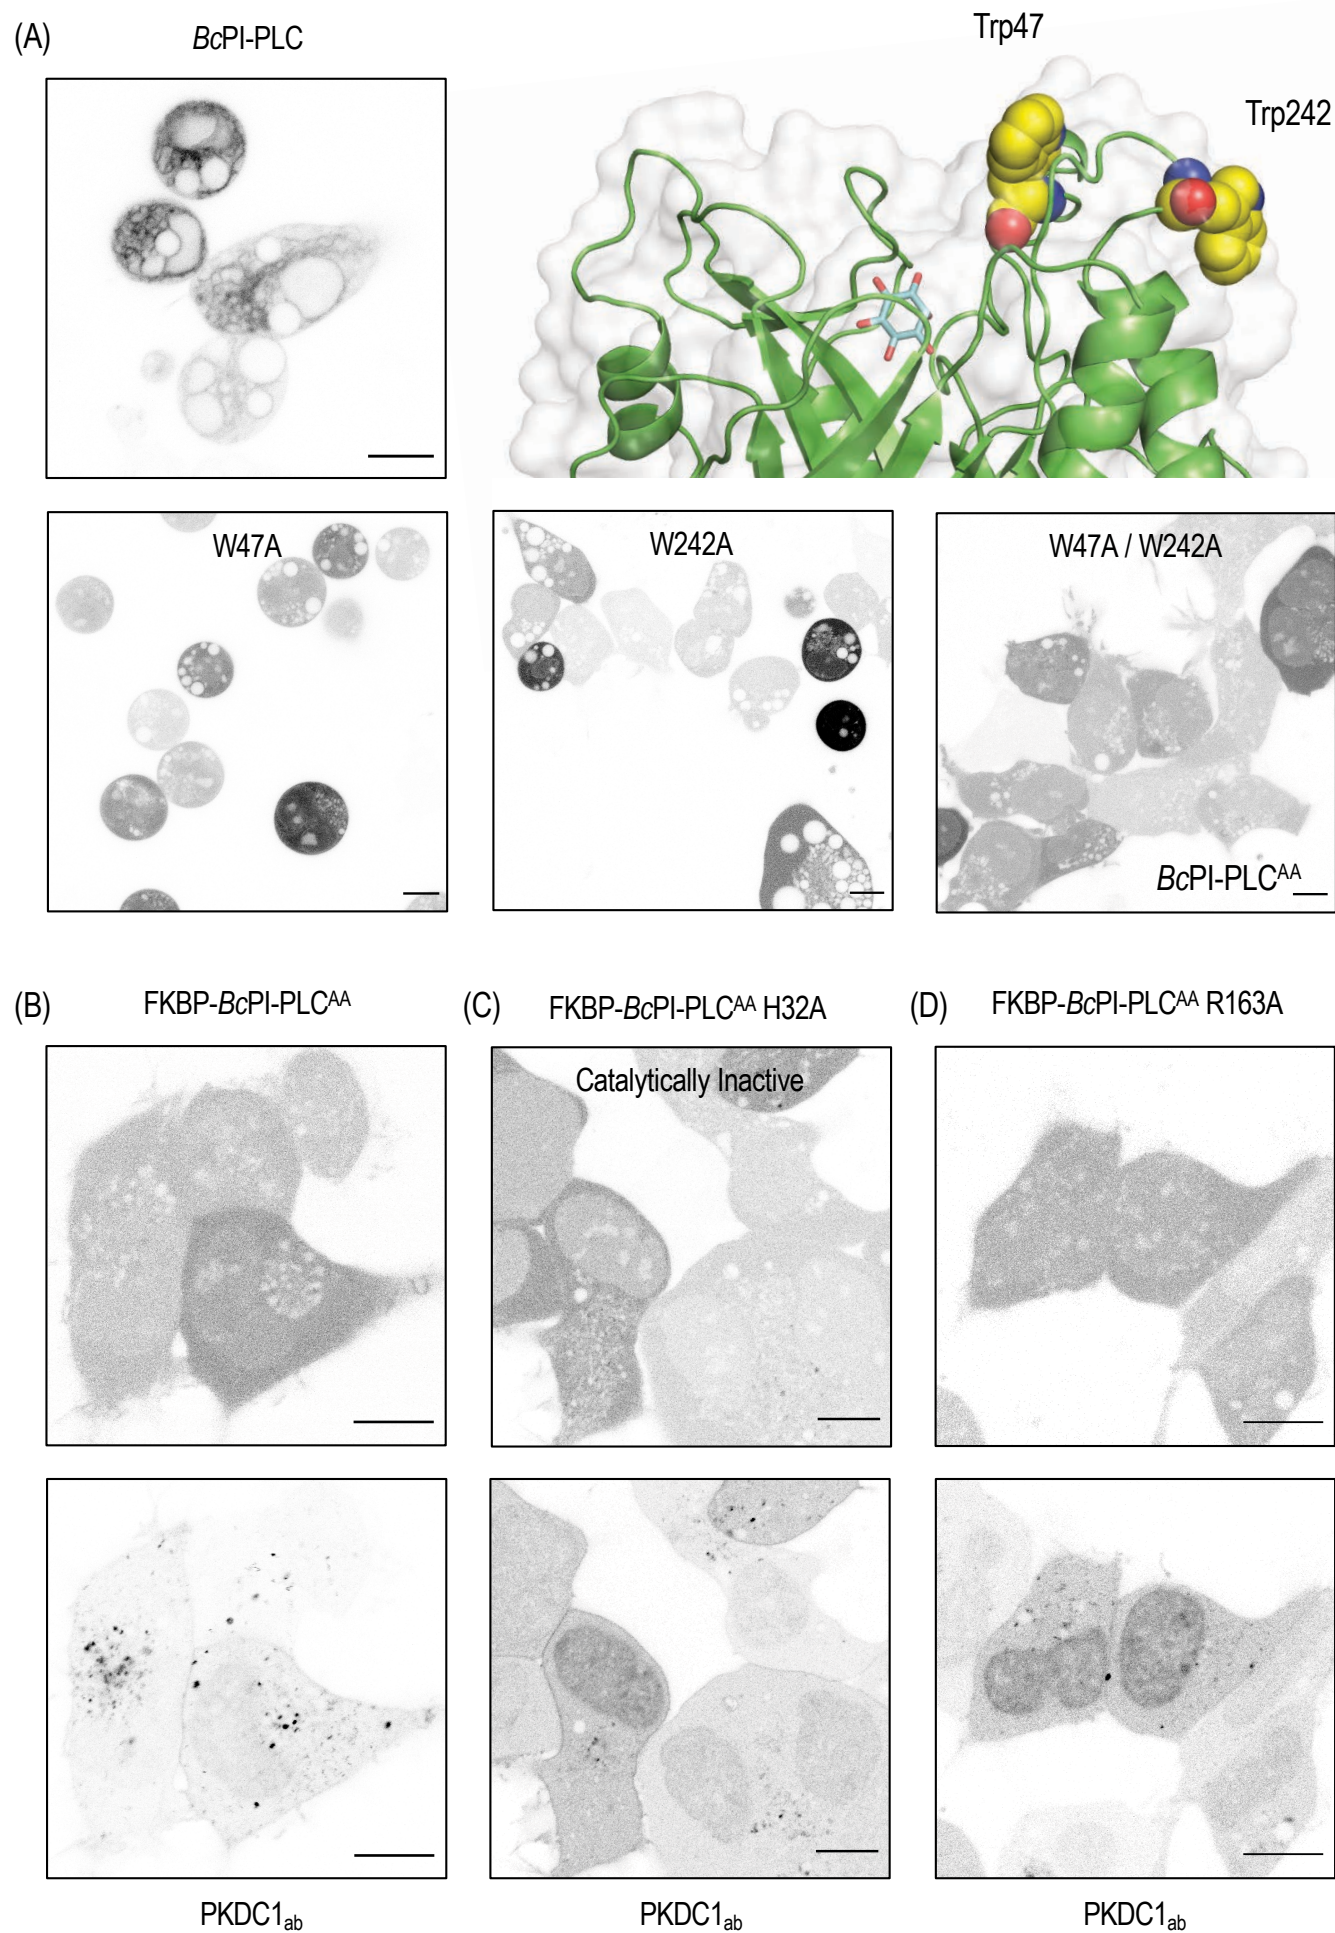

Figure 2

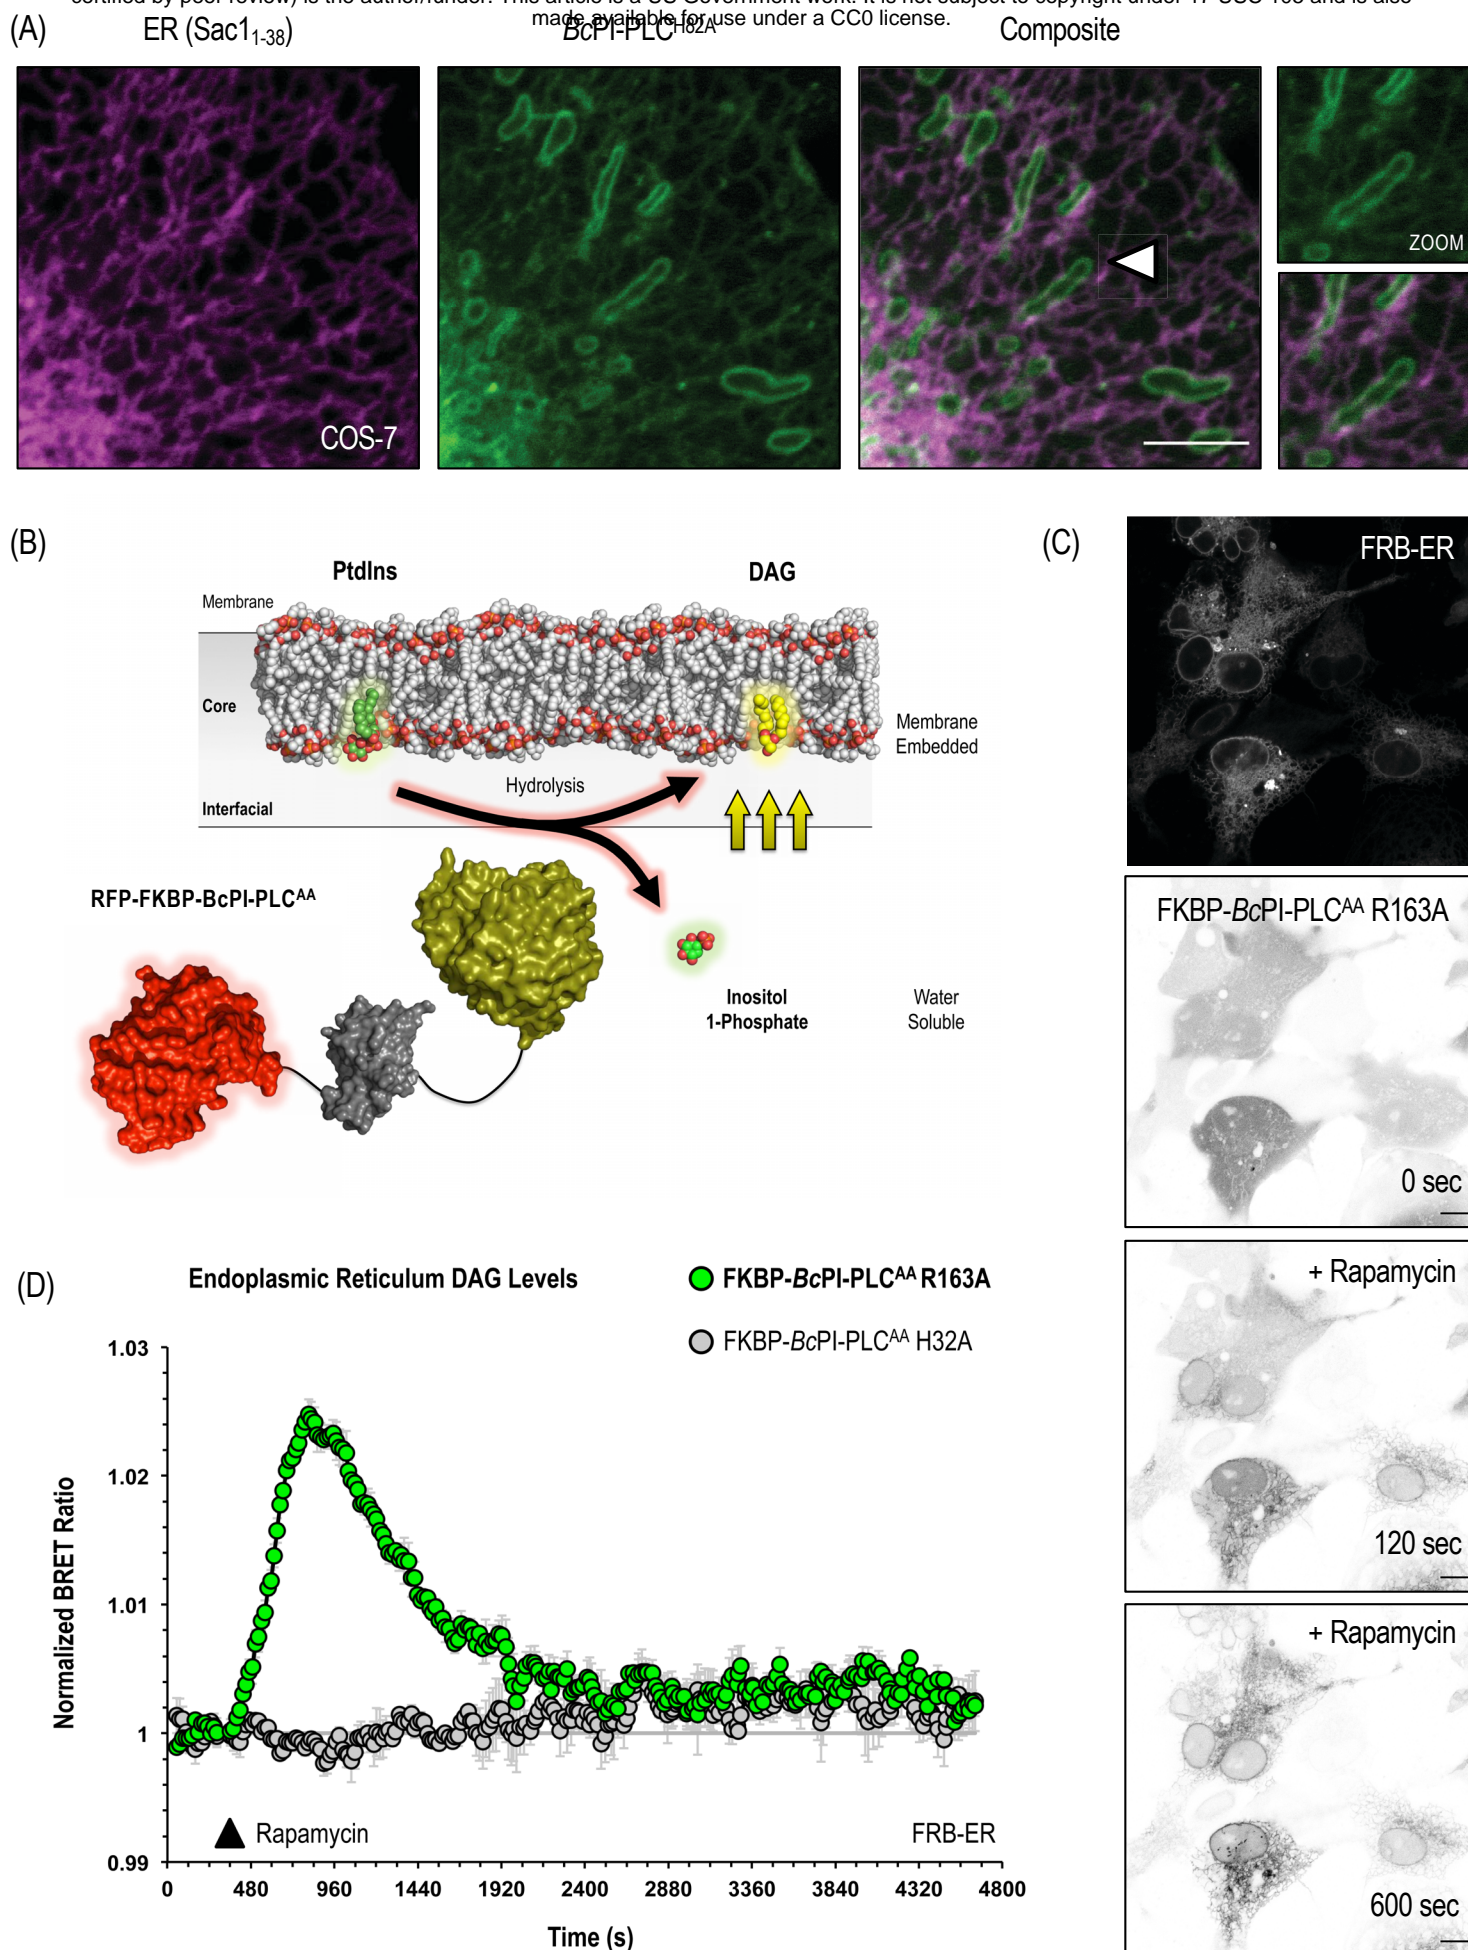

Figure 3

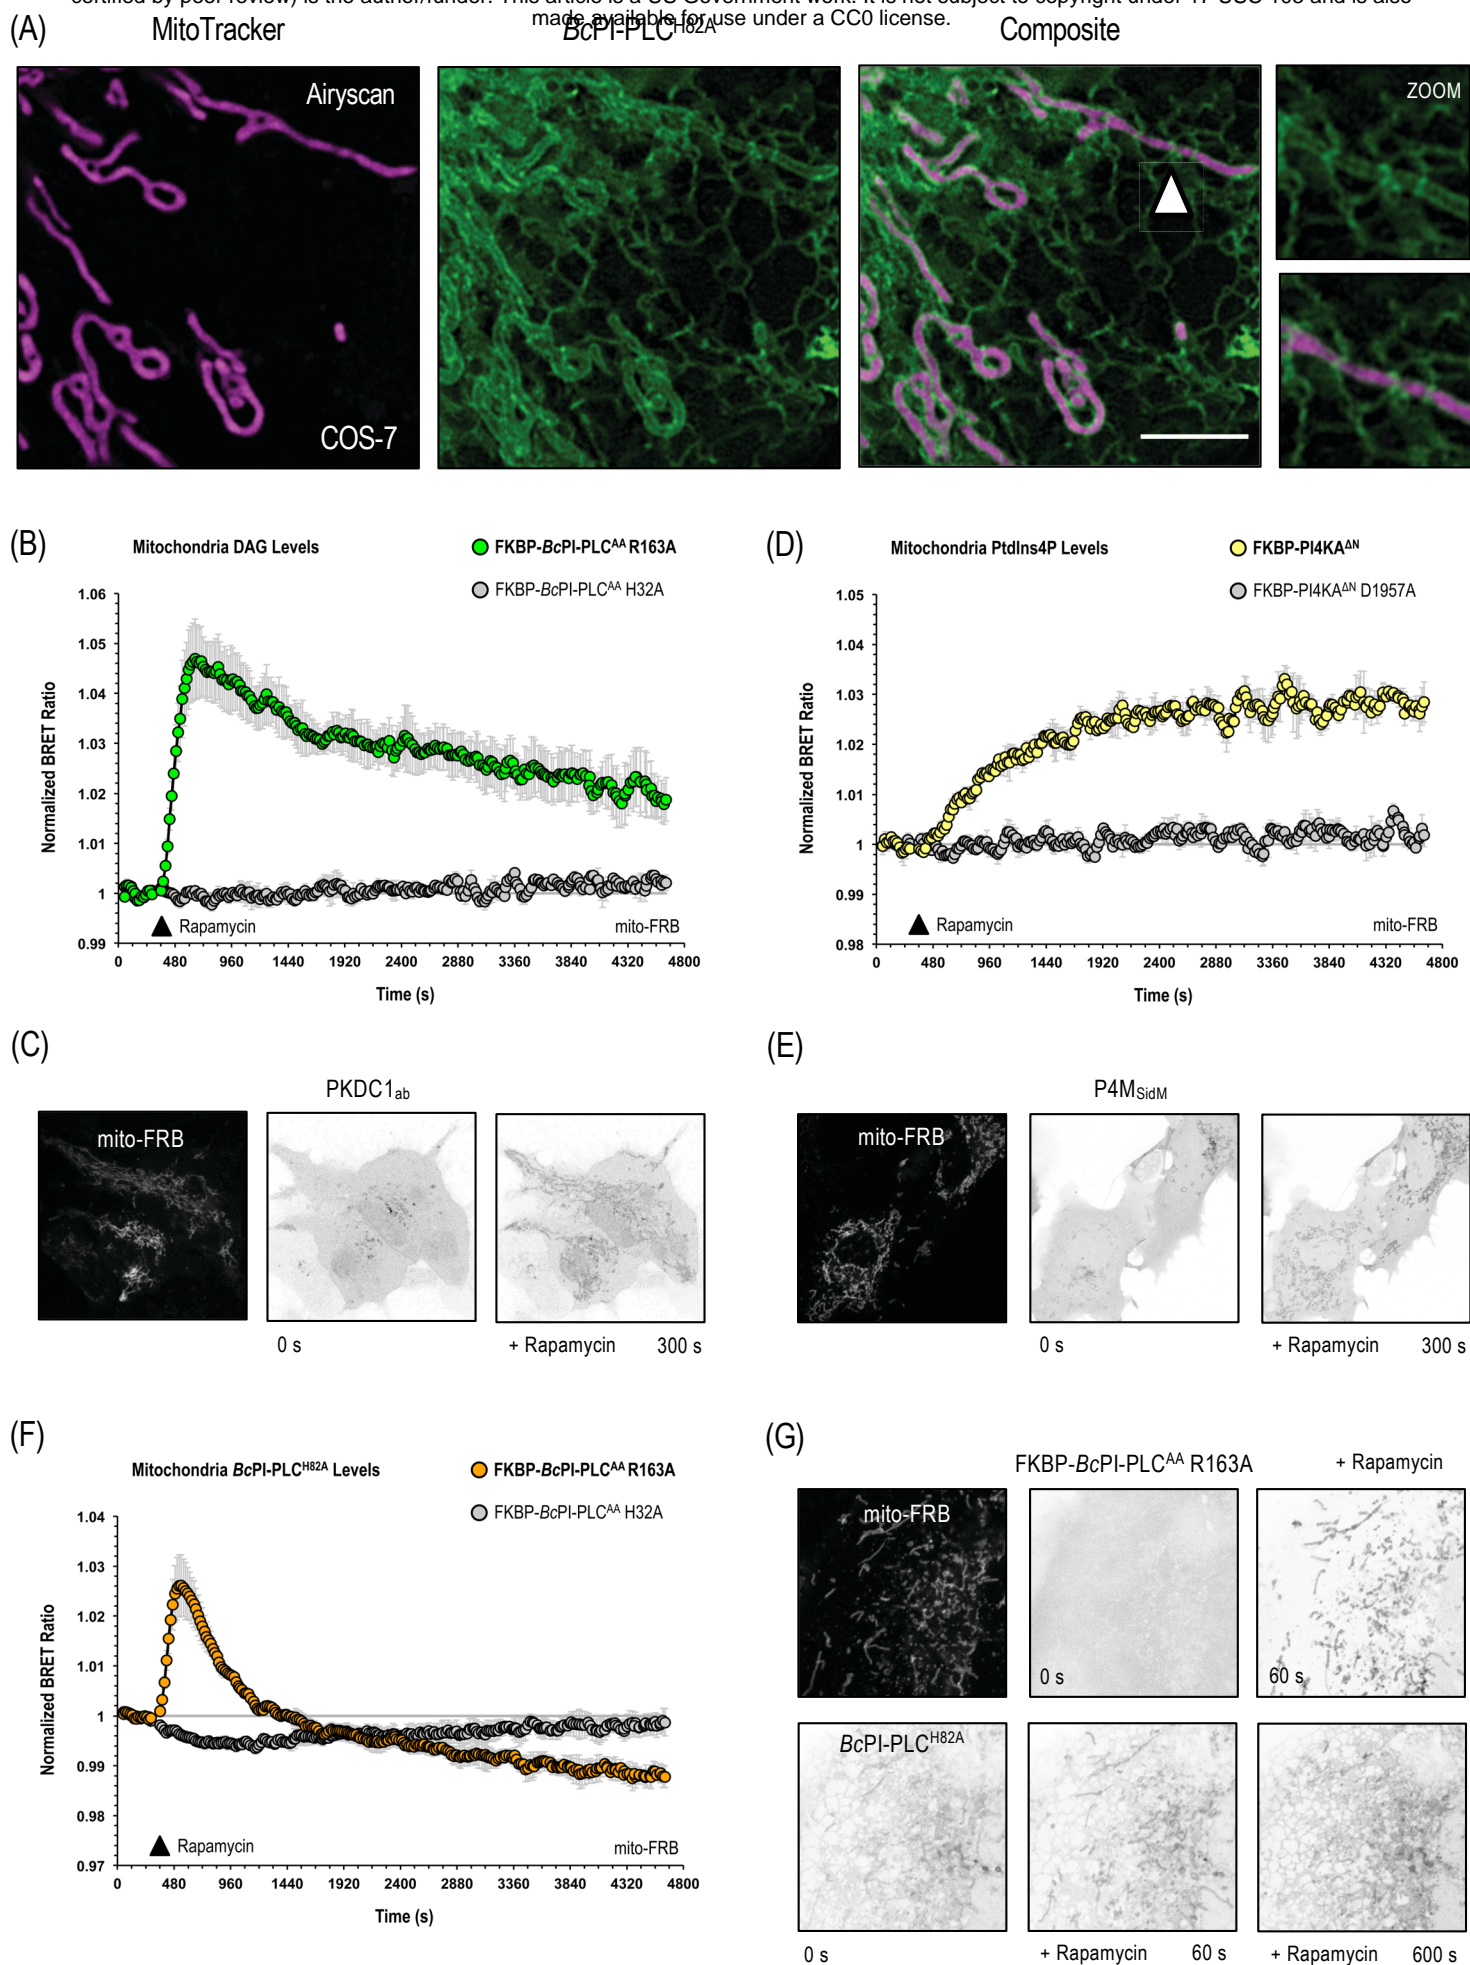

Figure 4

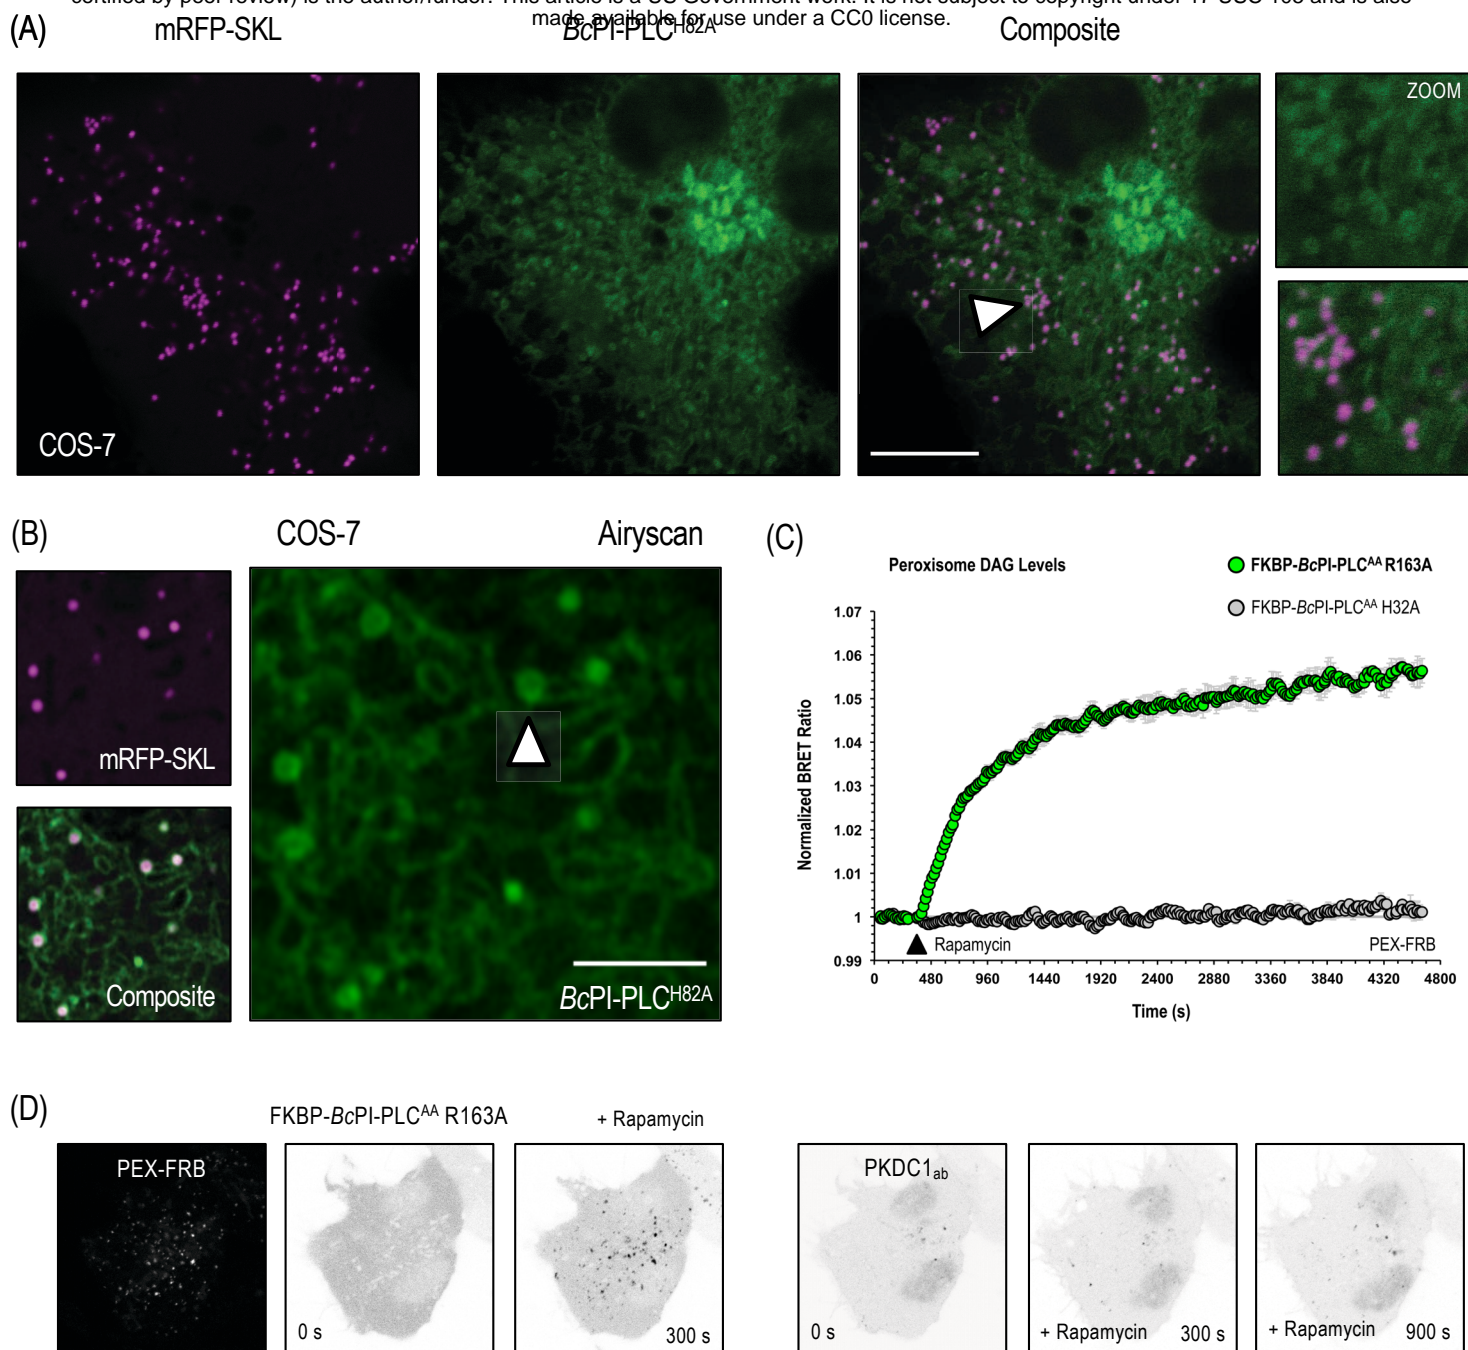

Figure 5

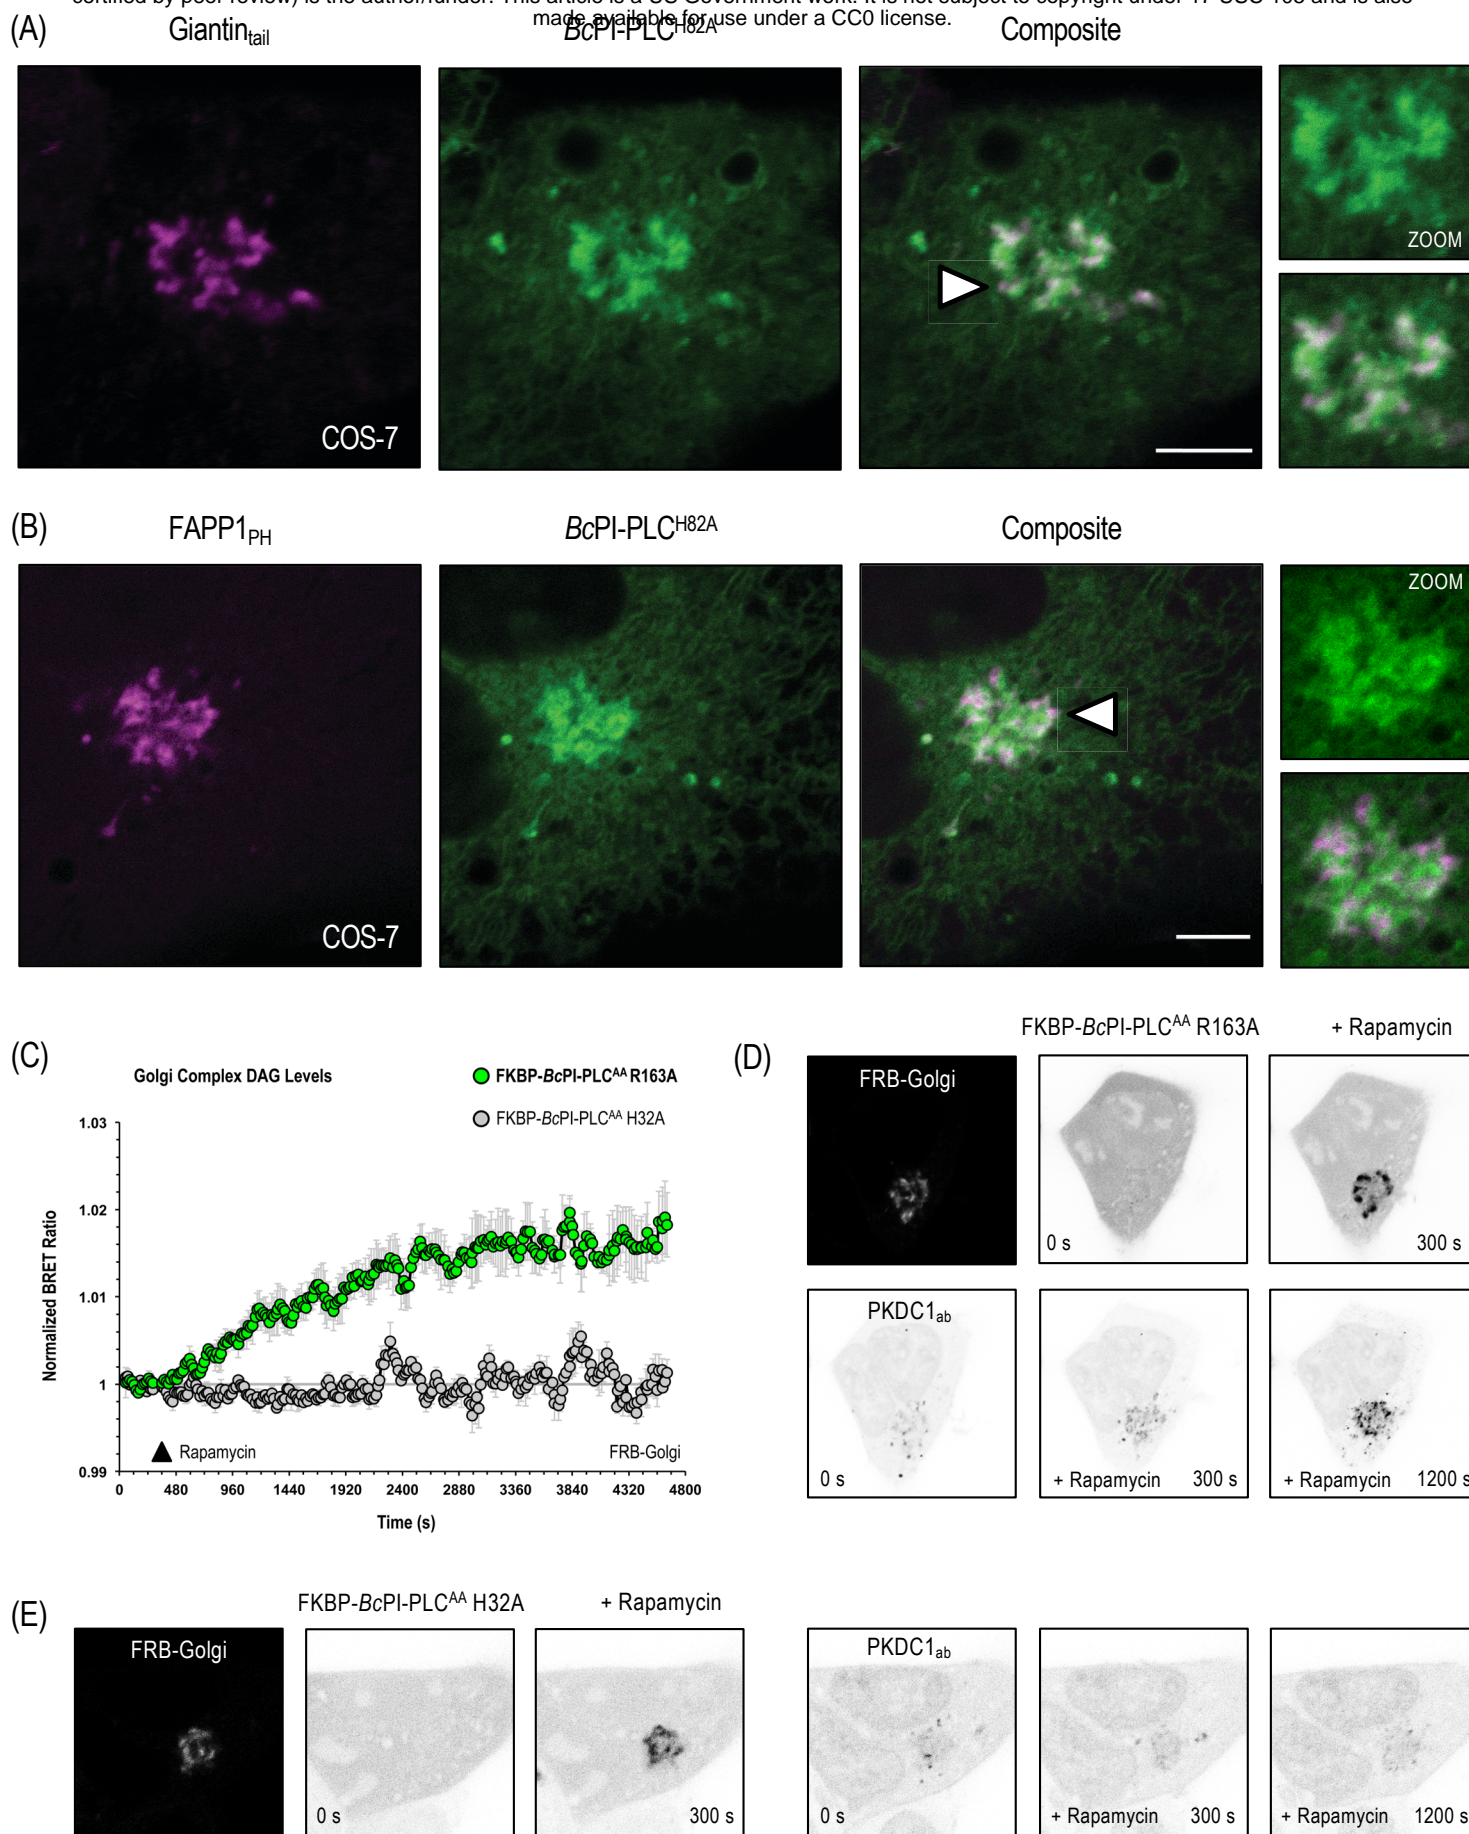

**Figure 6**

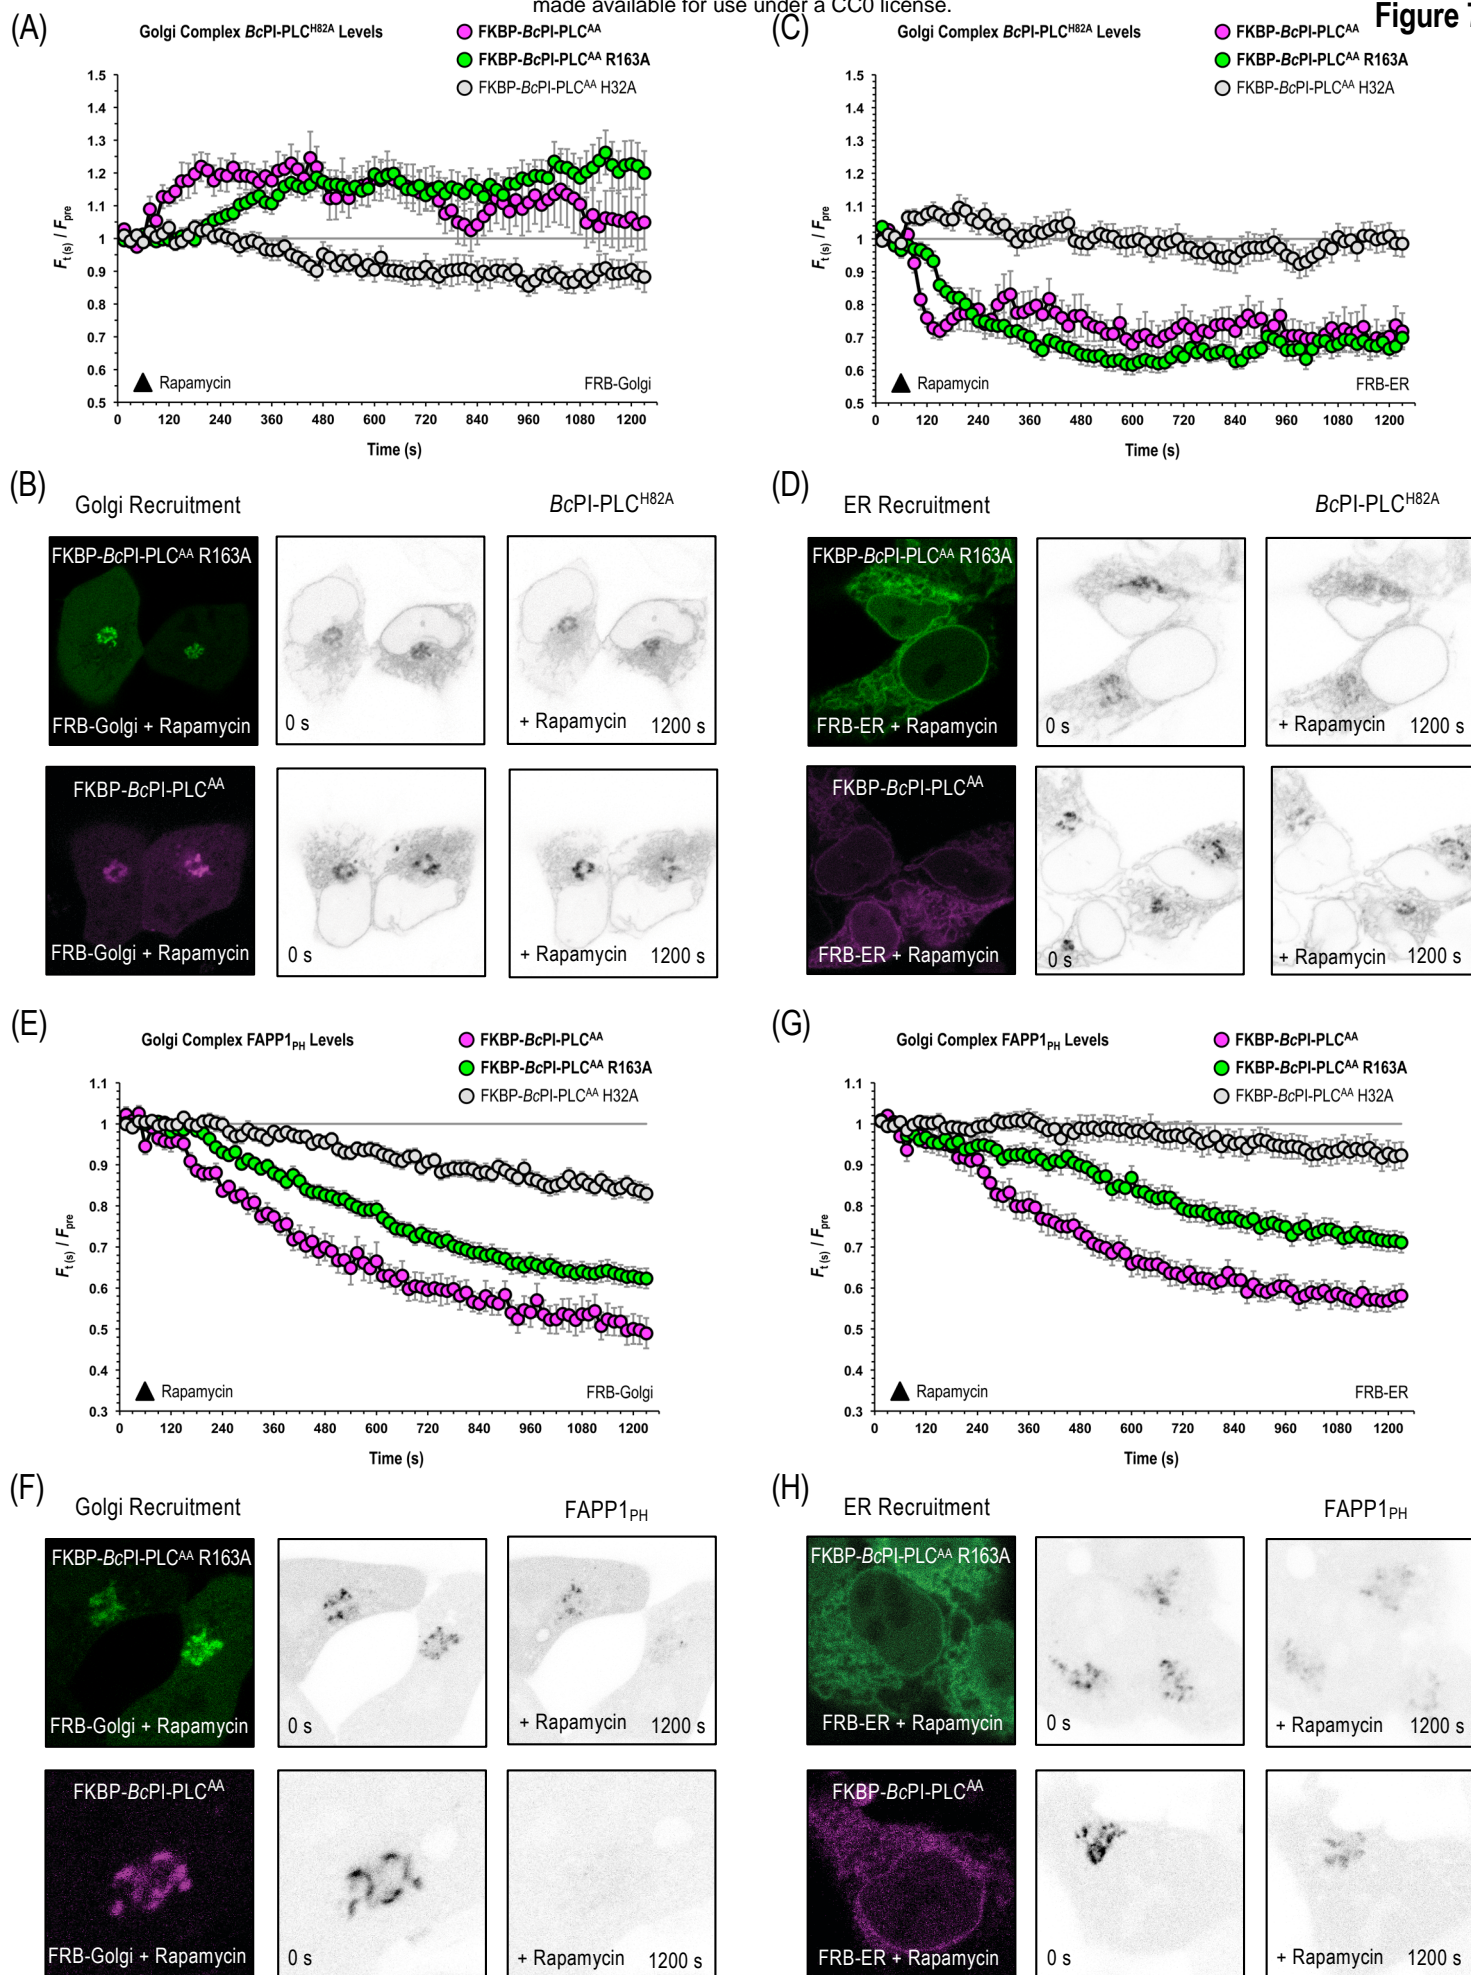



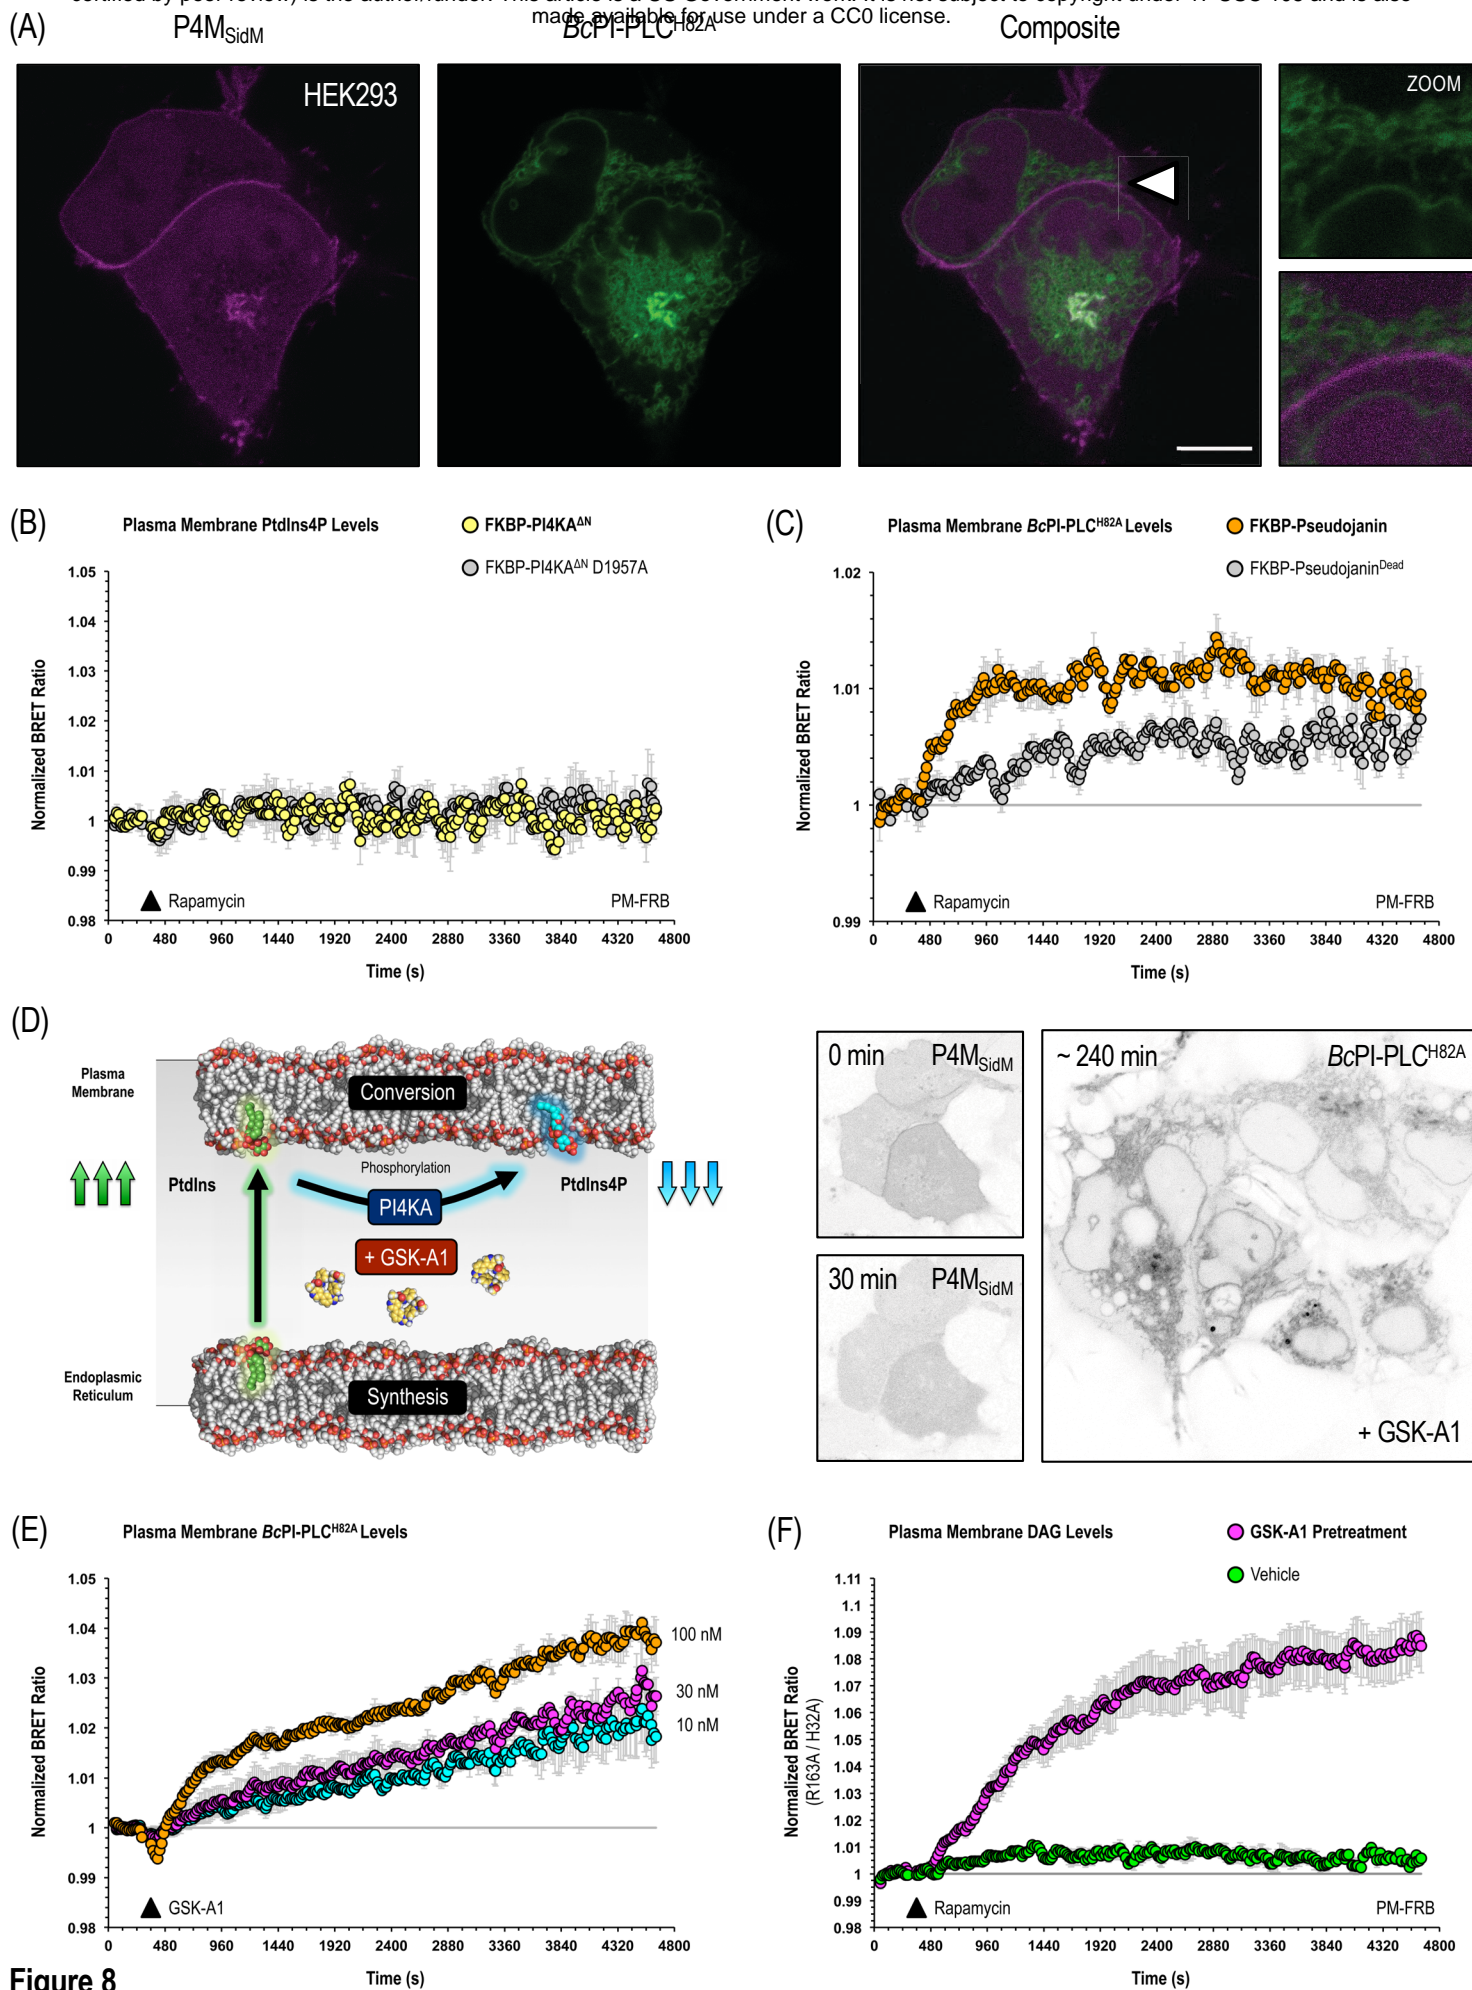

**Figure 8**

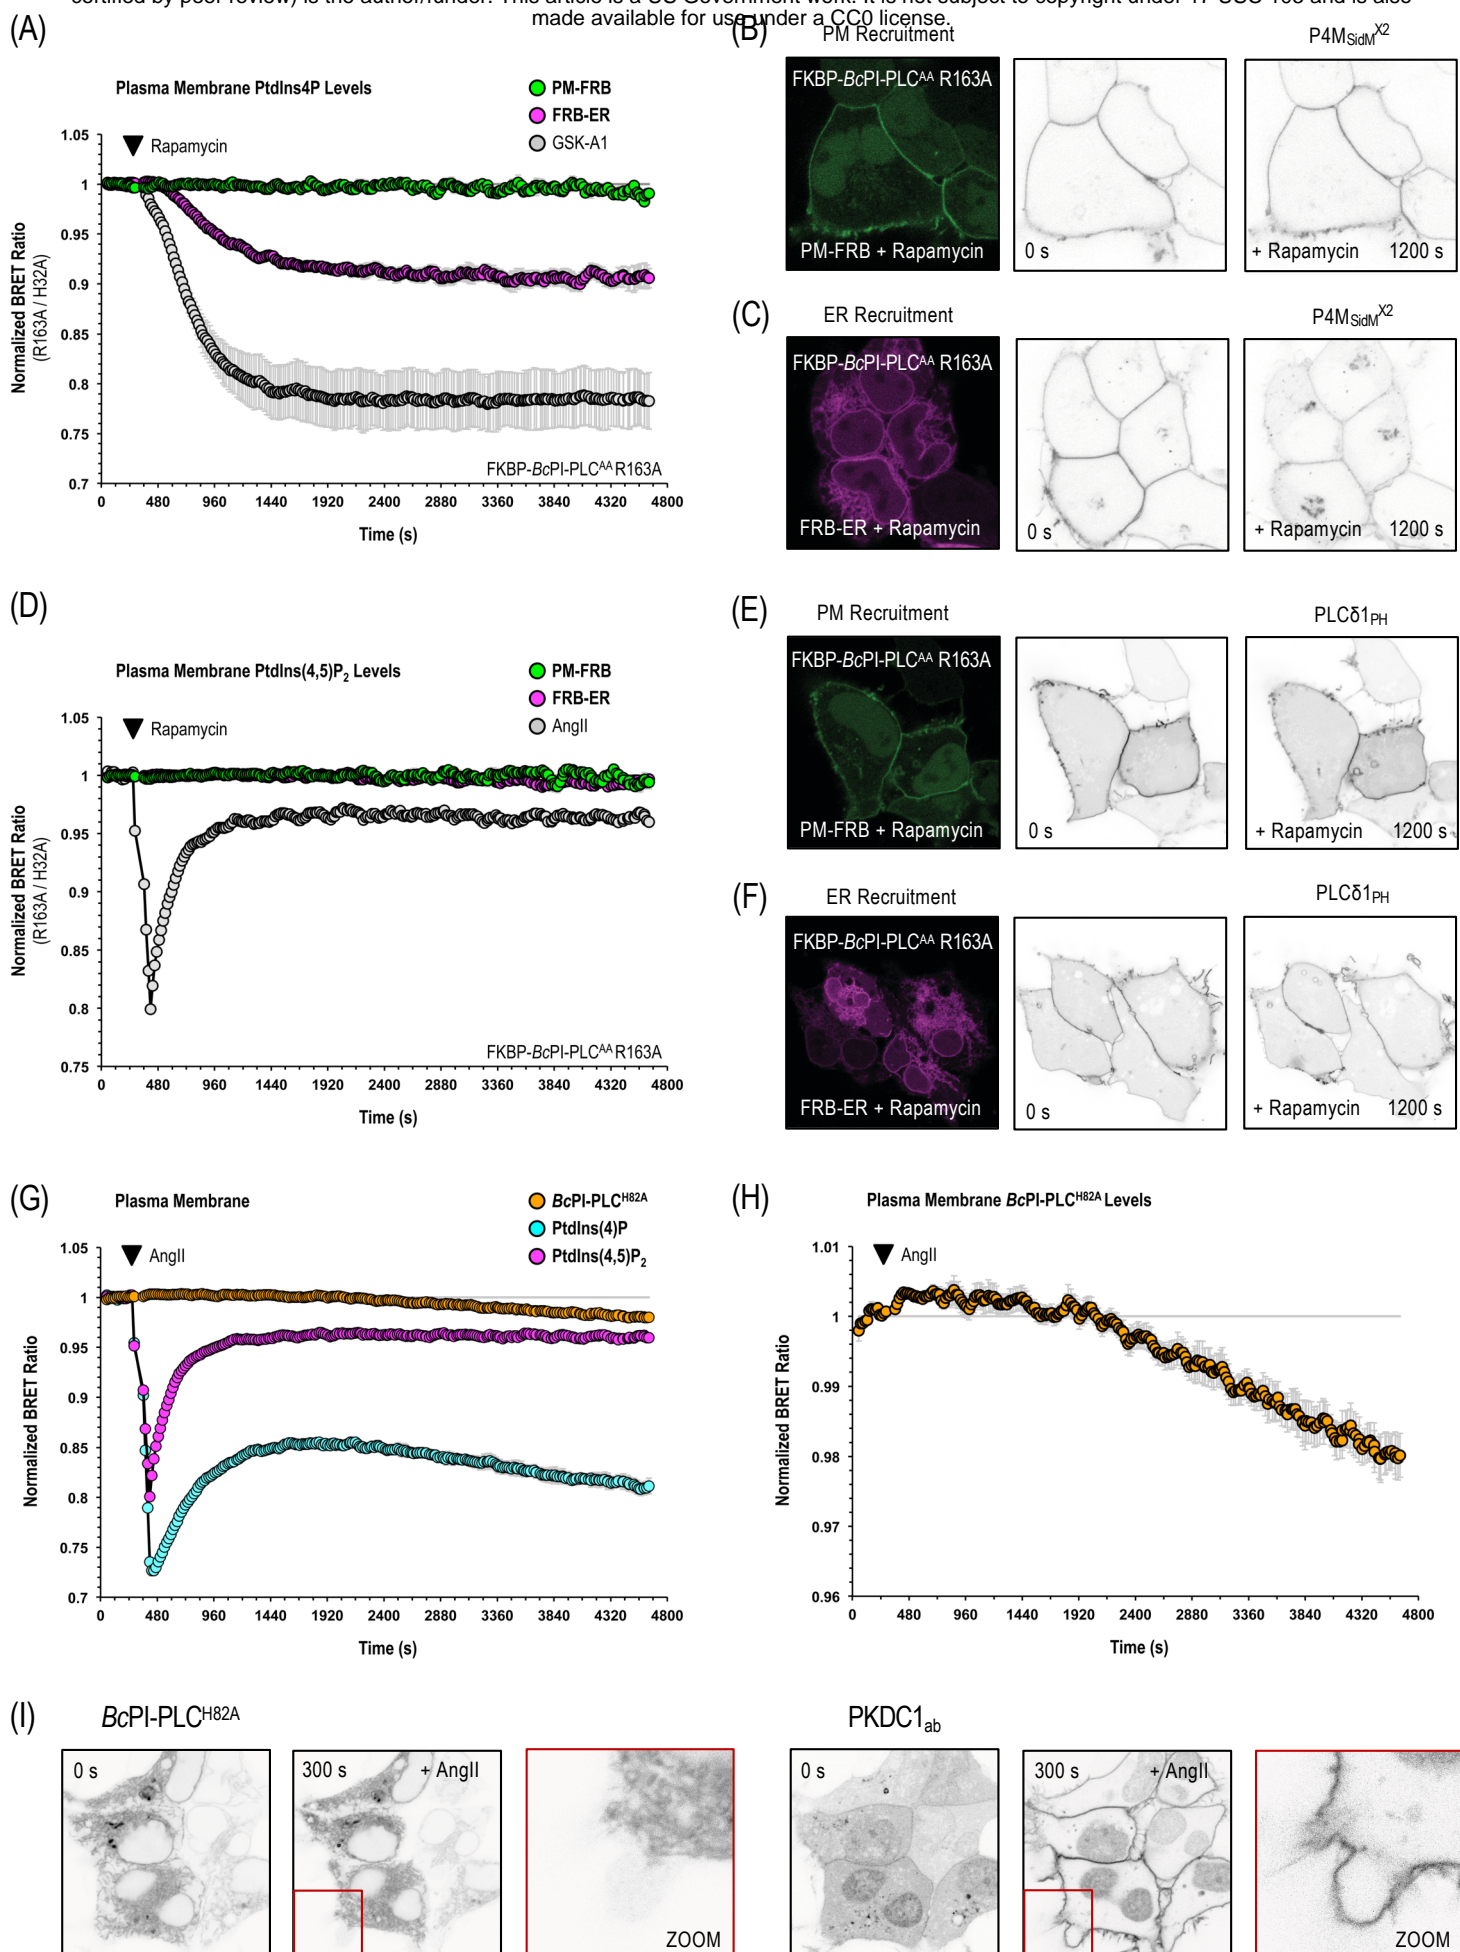

Figure 9

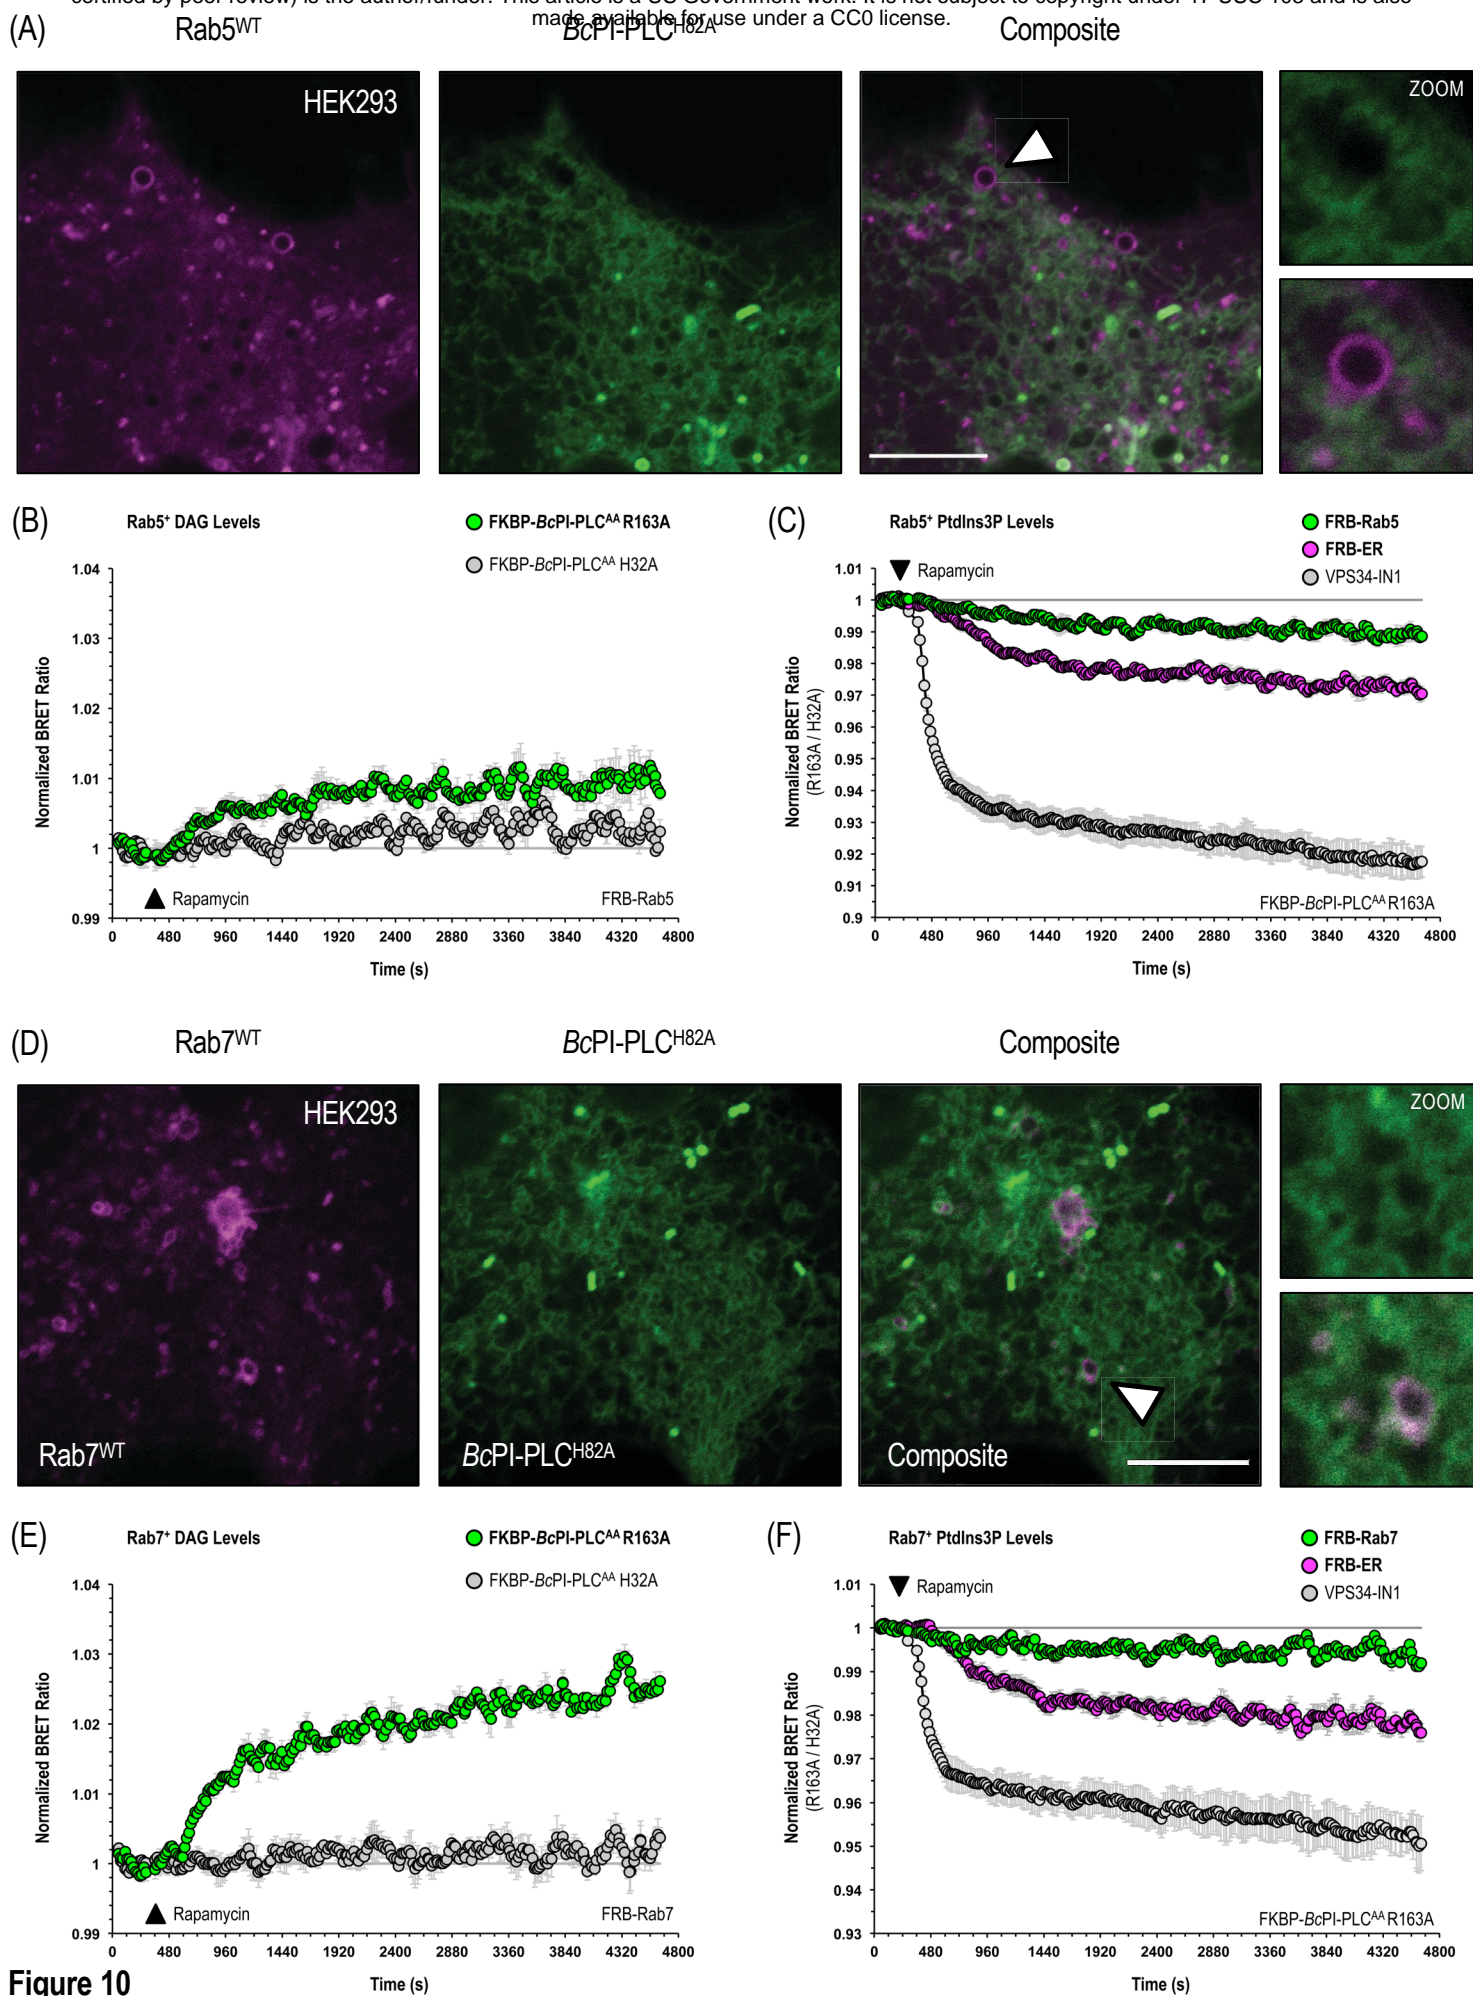

Figure 10

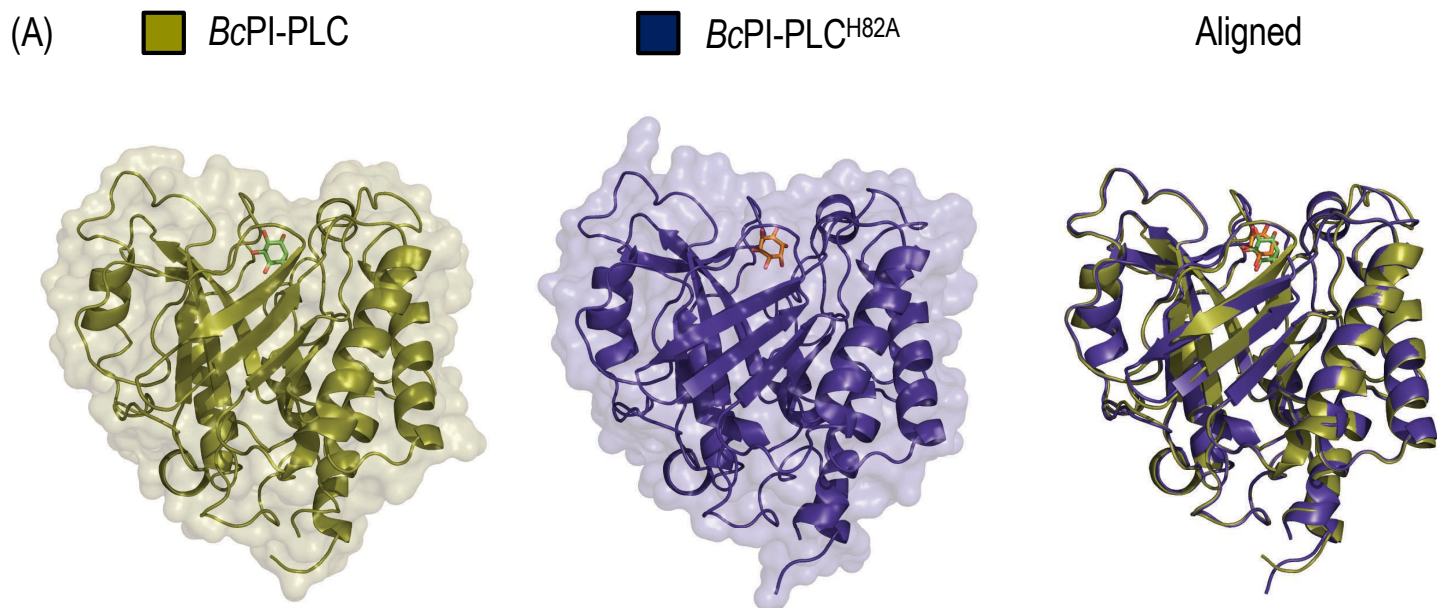

(B) *BcPI-PLC<sup>H82A</sup>* Active Site

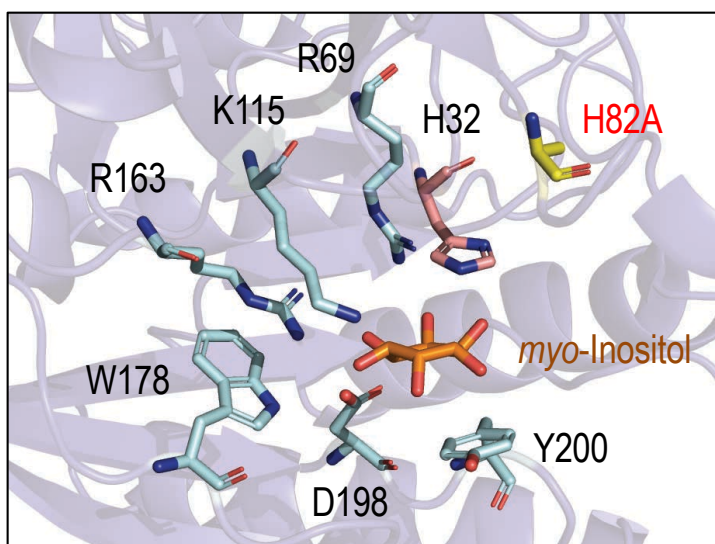

(C) Electron Density Map

*BcPI-PLC<sup>H82A</sup>*

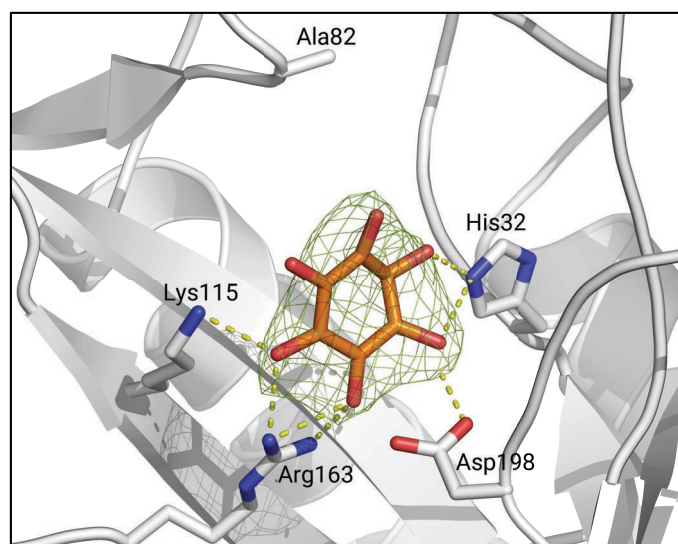

(A) *BcPI-PLC<sup>H82A</sup>*

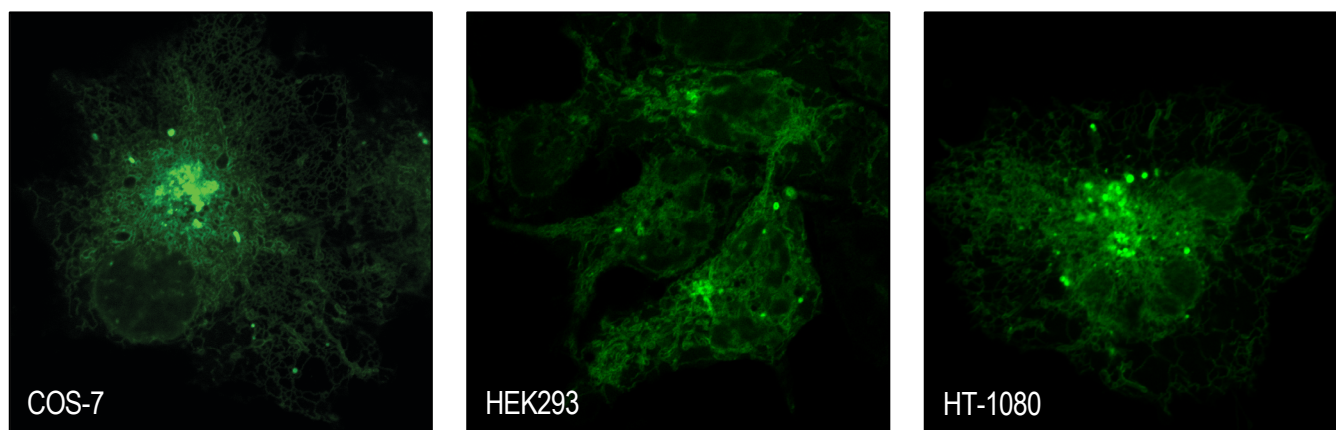

(B)

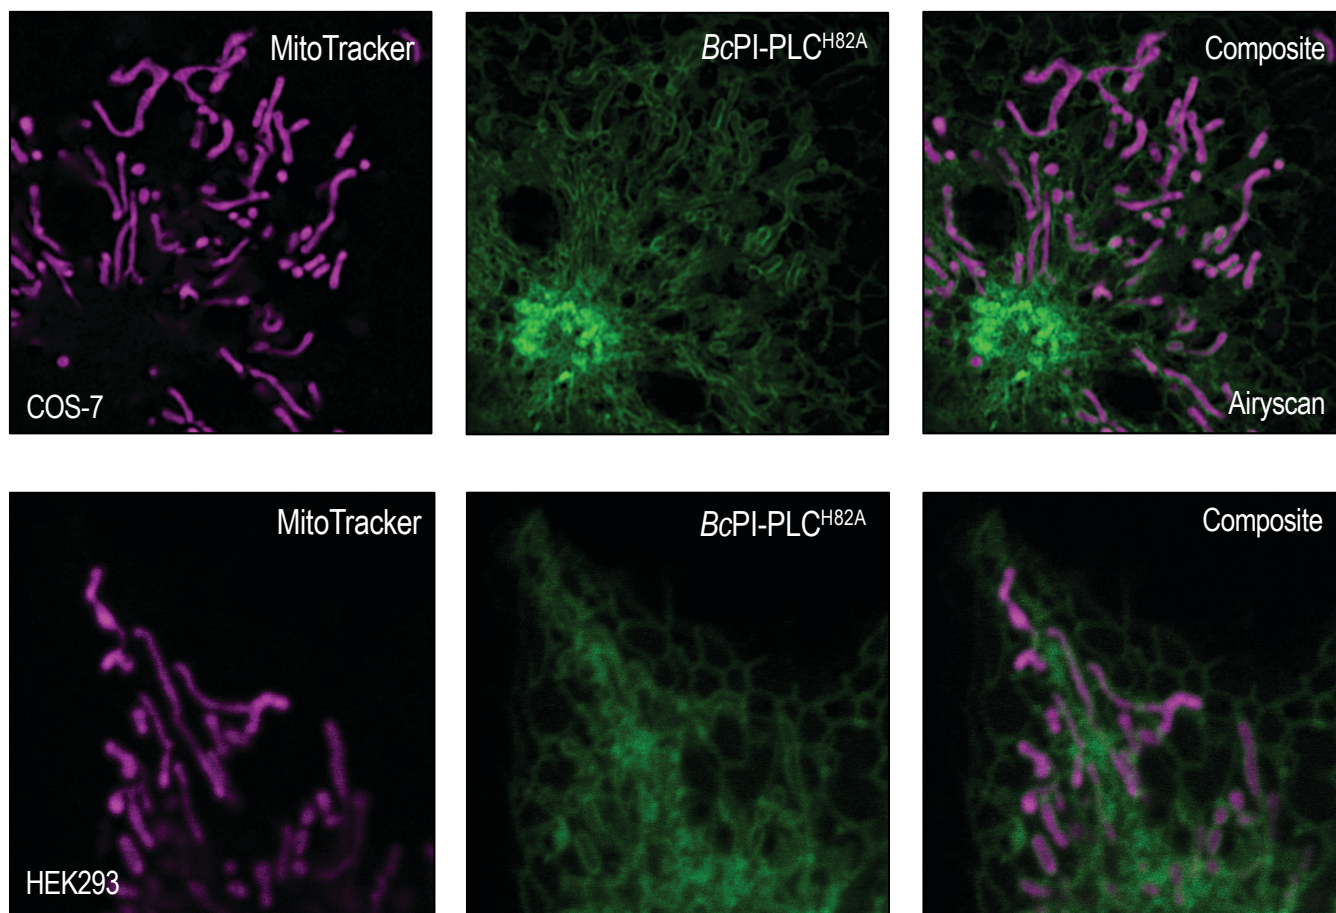

(C)

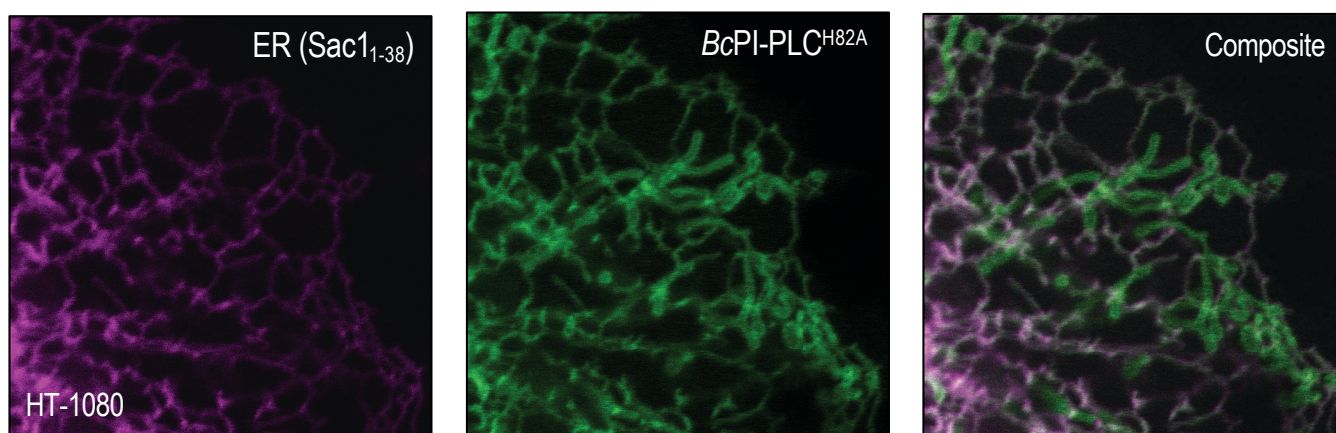

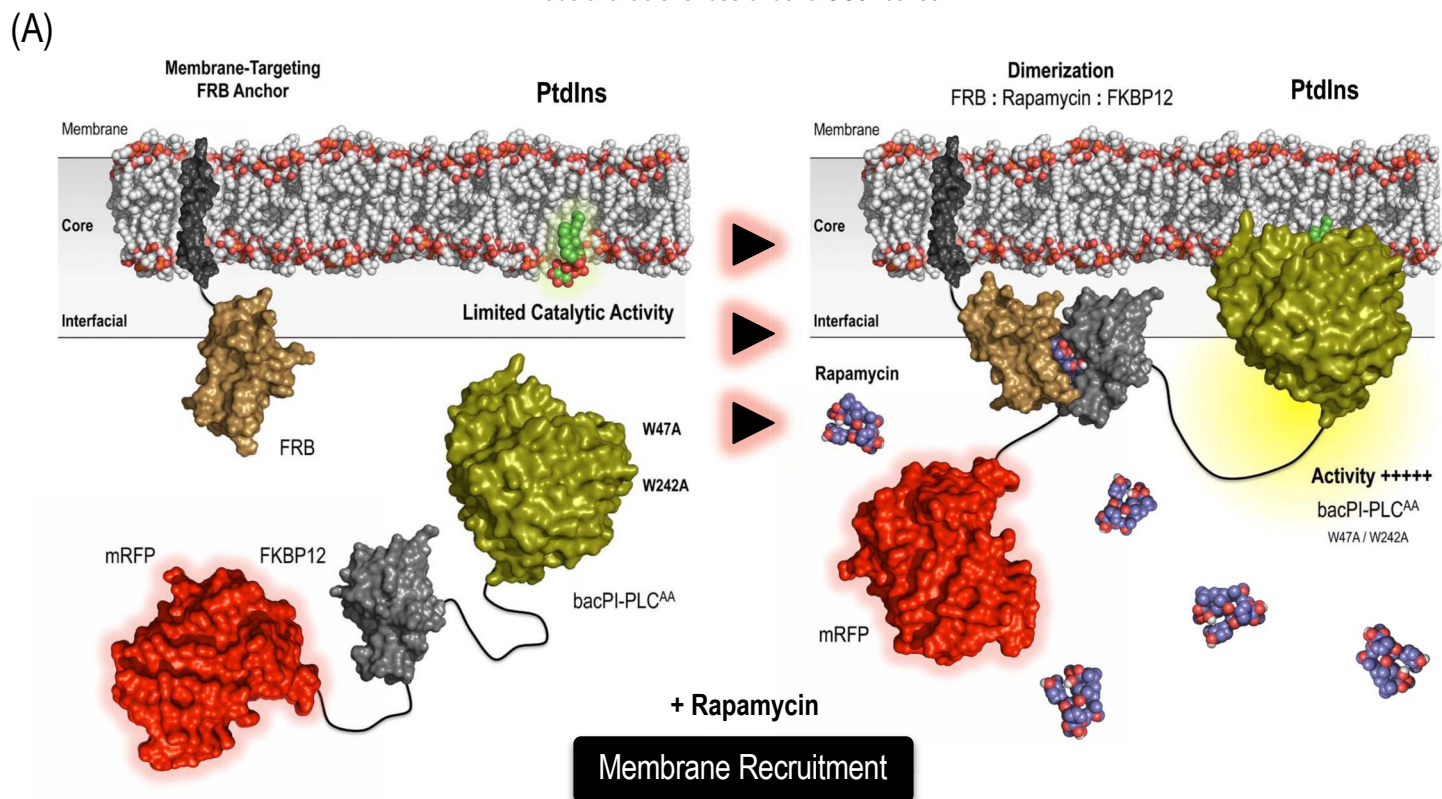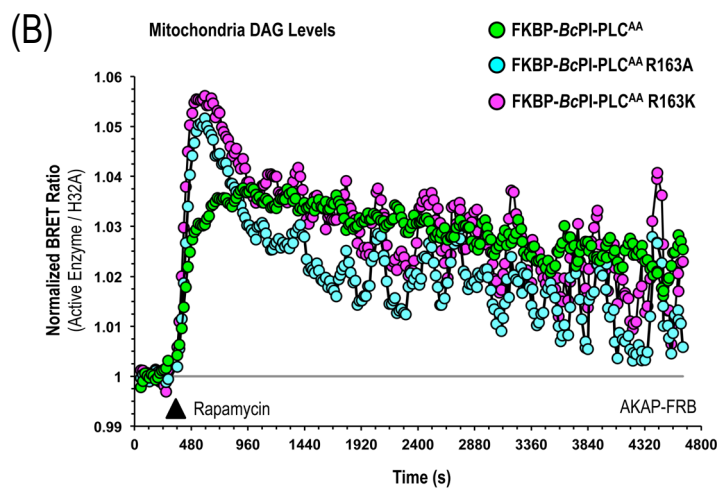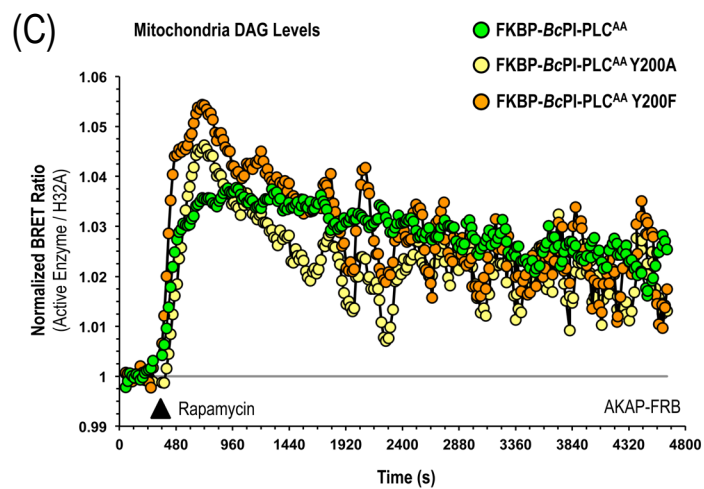

Table 2: Primers used in this study

| Construct                                                  | PCR Template                             | Primers | Sequence (5' to 3')                                                                | Cloning Enzymes | Cloning Backbone                                           |
|------------------------------------------------------------|------------------------------------------|---------|------------------------------------------------------------------------------------|-----------------|------------------------------------------------------------|
| EGFP-BcPI-PLC H32A                                         | EGFP-BcPI-PLC                            | Forward | CGGGAACCGCCGATAGCGGAACCTTCAAG                                                      | N/A             | N/A                                                        |
|                                                            |                                          | Reverse | TCCGCTATCGGCGGTTCCCGGTATGC                                                         |                 |                                                            |
| EGFP-BcPI-PLC H82A                                         | EGFP-BcPI-PLC                            | Forward | CTGCACGCCGGGCCACTGTACCTG                                                           | N/A             | N/A                                                        |
|                                                            |                                          | Reverse | GTGGCCCGGCGTGCAGTACGATCG                                                           |                 |                                                            |
| EGFP-BcPI-PLC W47A                                         | EGFP-BcPI-PLC                            | Forward | AGGTGGCGGGTATGACGCAAGAATACG                                                        | N/A             | N/A                                                        |
|                                                            |                                          | Reverse | CGTCATACCCGCCACCTGCTTGATG                                                          |                 |                                                            |
| EGFP-BcPI-PLC W242A                                        | EGFP-BcPI-PLC                            | Forward | CTGCCGCGAACAGCCCATACTACTACGCCAGC                                                   | N/A             | N/A                                                        |
|                                                            |                                          | Reverse | GTATGGGCTGTTTCGCGGCAGTTCACCGC                                                      |                 |                                                            |
| EGFP-BcPI-PLC W47A / W242A (AA)                            | EGFP-BcPI-PLC W47A                       | Forward | CTGCCGCGAACAGCCCATACTACTACGCCAGC                                                   | N/A             | N/A                                                        |
|                                                            |                                          | Reverse | GTATGGGCTGTTTCGCGGCAGTTCACCGC                                                      |                 |                                                            |
| mRFP-FKBP-BcPI-PLC <sup>AA</sup>                           | EGFP-BcPI-PLC W47A / W242A (AA)          | Forward | GGACTCAGATCTCGAGCTCAAGCTTCG                                                        | SacI            | mRFP-FKBP-Type IV 5-ptase Domain                           |
|                                                            |                                          | Reverse | ATATGGTACCCTACTCTTTAATCAGACTCTTGTTGGC                                              | KpnI            |                                                            |
| iRFP-FKBP-BcPI-PLC <sup>AA</sup> H32A                      | iRFP-FKBP-BcPI-PLC <sup>AA</sup>         | Forward | CGGGAACCGCCGATAGCGGAACCTTCAAG                                                      | N/A             | N/A                                                        |
|                                                            |                                          | Reverse | TCCGCTATCGGCGGTTCCCGGTATGC                                                         |                 |                                                            |
| iRFP-FKBP-BcPI-PLC <sup>AA</sup> R163A                     | iRFP-FKBP-BcPI-PLC <sup>AA</sup>         | Forward | CTGCTGAAGGCATATTCTGGATCTAACGAACC                                                   | N/A             | N/A                                                        |
|                                                            |                                          | Reverse | GAATATGCCTTCAGCAGGACAATCTTGCC                                                      |                 |                                                            |
| iRFP-FKBP-BcPI-PLC <sup>AA</sup> R163K                     | iRFP-FKBP-BcPI-PLC <sup>AA</sup>         | Forward | CTGCTGAAGAAATATTCTGGATCTAACGAACC                                                   | N/A             | N/A                                                        |
|                                                            |                                          | Reverse | GAATATTTCTTCAGCAGGACAATCTTGCC                                                      |                 |                                                            |
| iRFP-FKBP-BcPI-PLC <sup>AA</sup> Y200A                     | iRFP-FKBP-BcPI-PLC <sup>AA</sup>         | Forward | CAGGATAAGGCCAAAGTATCCTATGACGAGAAG                                                  | N/A             | N/A                                                        |
|                                                            |                                          | Reverse | GTCATAGGATACTTTGGCCTTATCCTGGACTG                                                   |                 |                                                            |
| iRFP-FKBP-BcPI-PLC <sup>AA</sup> Y200F                     | iRFP-FKBP-BcPI-PLC <sup>AA</sup>         | Forward | CAGGATAAGTTCAAAGTATCCTATGACGAGAAG                                                  | N/A             | N/A                                                        |
|                                                            |                                          | Reverse | GTCATAGGATACTTTGAACTTATCCTGGACTG                                                   |                 |                                                            |
| mTagBFP2-FRB-CyB5 <sub>tail</sub>                          | AKAP-FRB-ECFP W66A                       | Forward | TATAGCTCGAGCGGGTGCTATCCTATCTAGAATCCTC TGGCATG                                      | XhoI            | mTagBFP2-FKBP-CyB5 <sub>tail</sub>                         |
|                                                            |                                          | Reverse | ATATAAGAATTCTGAACCACCAGCACTACCACCAGCAC TACCACCAGCACTACTAGTCTTTGAGATTCTCGGAA CACATG | EcoRI           |                                                            |
| mTagBFP2-FRB-CyB5 <sub>tail</sub> E215A                    | mTagBFP2-FRB-CyB5 <sub>tail</sub>        | Forward | CAGCACGCGGTGGCAGTGGC                                                               | N/A             | N/A                                                        |
|                                                            |                                          | Reverse | TGCCACCGCGTGCTGCTCG                                                                |                 |                                                            |
| sLuc-FYVE <sup>EEA1</sup> -T2A-mVenus-CyB5 <sub>tail</sub> | mTagBFP2-FKBP-CyB5 <sub>tail</sub>       | Forward | ATATTCCGGACTCGCTGGTGGTAGTGCTGGTGGTAG TGCTG                                         | BspEI           | sLuc-FYVE <sup>EEA1</sup> -T2A-mVenus-Rab7                 |
|                                                            |                                          | Reverse | ATATGGTACCTCAGTCCTCTGCCATGTATAGGCGATACATC                                          | KpnI            |                                                            |
| sLuc-PKDC <sub>1ab</sub> -T2A-mVenus-CyB5 <sub>tail</sub>  | AKAP-mVenus-T2A-sLuc-PKDC <sub>1ab</sub> | Forward | ATATCGATCGGCTCAAGCTTCTGAATTCACACTAGTGAA GACTTCC                                    | PvuI            | sLuc-FYVE <sup>EEA1</sup> -T2A-mVenus-CyB5 <sub>tail</sub> |
|                                                            |                                          | Reverse | ATATGTCGACAGATTCTGCACCAGGGCTAAGTAATTC TCC                                          | Sall            |                                                            |

Table 2 (Continued): Primers used in this study

| Construct                                                   | PCR Template                                  | Primers | Sequence (5' to 3')                                 | Cloning Enzymes | Cloning Backbone                                                   |
|-------------------------------------------------------------|-----------------------------------------------|---------|-----------------------------------------------------|-----------------|--------------------------------------------------------------------|
| AKAP-FRB-ECFP W66A                                          | AKAP-FRB-ECFP                                 | Forward | CTGACCGCGGGCGTGCAGTGC                               | N/A             | N/A                                                                |
|                                                             |                                               | Reverse | CACGCCCGCGGTCAGGGTGG                                |                 |                                                                    |
| AKAP-mVenus-T2A-sLuc-BcPI-PLC <sup>H82A</sup>               | EGFP-BcPI-PLC H82A                            | Forward | ATATACTAGTGCCTCTTCAGTGAACGAGCTGG                    | SpeI            | AKAP-mVenus-T2A-sLuc-PKDC1 <sub>ab</sub>                           |
|                                                             |                                               | Reverse | ATATGGATCCCTACTCTTTAATCAGACTCTTGTTGGC<br>CCTAATAACC | BamHI           |                                                                    |
| PEX3 <sub>1-42</sub> -FRB-ECFP                              | PEX-mCherry-CRY2                              | Forward | ATATGCTAGCACCATGCTGAGGTCTGTATGGAATTTT<br>CTGAAACG   | NheI            | AKAP-FRB-ECFP                                                      |
|                                                             |                                               | Reverse | ATATGGATCCTTTCCCTTTCTGTATTTCTCTGATTT<br>TCTTCTGTCC  | BamHI           |                                                                    |
| PEX3 <sub>1-42</sub> -FRB-ECFP W66A                         | PEX3 <sub>1-42</sub> -FRB-ECFP                | Forward | CTGACCGCGGGCGTGCAGTGC                               | N/A             | N/A                                                                |
|                                                             |                                               | Reverse | CACGCCCGCGGTCAGGGTGG                                |                 |                                                                    |
| L <sub>10</sub> -mVenus-T2A-sLuc-Spo20 <sup>(DM)</sup>      | NES-mdsRed-Spo20 <sup>51-90</sup> C54S / C82S | Forward | ATATAGATCTGCATCAGCAGCTTTCAGAAG                      | BglII           | L <sub>10</sub> -mVenus-T2A-sLuc-P4M <sub>SidM</sub> <sup>X2</sup> |
|                                                             |                                               | Reverse | ATATGAATTCCCGGTGGATCCTTAAGTAGTC                     | EcoRI           |                                                                    |
| PEX3 <sub>1-42</sub> -mVenus-T2A-sLuc-Spo20 <sup>(DM)</sup> | PEX-mCherry-CRY2                              | Forward | ATATCATATGCCAAGTACGCCCTATTGACG                      | NdeI            | L <sub>10</sub> -mVenus-T2A-sLuc-Spo20 <sup>(DM)</sup>             |
|                                                             |                                               | Reverse | ATATCGATCGTTCCCTTTCTGTATTTCTCTGATTTTC<br>TTCTGTCC   | PvuI            |                                                                    |
| ECFP-FRB-Giantin W66A                                       | ECFP-FRB-Giantin                              | Forward | CTGACCGCGGGCGTGCAGTGC                               | N/A             | N/A                                                                |
|                                                             |                                               | Reverse | CACGCCCGCGGTCAGGGTGG                                |                 |                                                                    |
| sLuc-FYVE <sup>EEA1</sup> -T2A-mVenus-Giantin               | ECFP-FRB-Giantin                              | Forward | ATATTCGGACTCGGATCCGGTGCTGCTATCCT<br>GAATTCC         | BspEI           | sLuc-FYVE <sup>EEA1</sup> -T2A-mVenus-Rab7                         |
|                                                             |                                               | Reverse | ATATGGTACCCTATAGATGGCCCGTAAAACACAGAAT<br>GAGCAGG    | KpnI            |                                                                    |
| sLuc-PKDC1 <sub>ab</sub> -T2A-mVenus-Giantin                | AKAP-mVenus-T2A-sLuc-PKDC1 <sub>ab</sub>      | Forward | ATATCGATCGGCTCAAGCTTCAATTCAACTAGTGAA<br>GACTTCC     | PvuI            | sLuc-FYVE <sup>EEA1</sup> -T2A-mVenus-Giantin                      |
|                                                             |                                               | Reverse | ATATGTCGACAGATTCTGCACCAGGGCTAAGTAATTC<br>TCC        | Sall            |                                                                    |
| PM2-FRB-ECFP W66A                                           | PM2-FRB-ECFP                                  | Forward | CTGACCGCGGGCGTGCAGTGC                               | N/A             | N/A                                                                |
|                                                             |                                               | Reverse | CACGCCCGCGGTCAGGGTGG                                |                 |                                                                    |
| L <sub>10</sub> -mVenus-T2A-sLuc-BcPI-PLC <sup>H82A</sup>   | EGFP-BcPI-PLC H82A                            | Forward | ATATCTCGAGAAGCCTCTTCAGTGAACGAGCTGG                  | XhoI            | L <sub>10</sub> -mVenus-T2A-sLuc-D4H                               |
|                                                             |                                               | Reverse | ATATGAATTCCTACTCTTTAATCAGACTCTTGTTGGCC<br>CTAATAACC | EcoRI           |                                                                    |
| sLuc-FYVE <sup>Hrs</sup> <sup>X2</sup> -T2A-mVenus-Rab7     | EGFP-FYVE <sup>Hrs</sup> <sup>X2</sup>        | Forward | ATATCGATCGGAAAGTGATGCCATGTTGCTGCTG                  | PvuI            | P4M <sub>SidM</sub> <sup>X2</sup> -T2A-mVenus-Rab7                 |
|                                                             |                                               | Reverse | ATATGTCGACTGCCTTCTTGTTGAGCTCATAGCAG                 | Sall            |                                                                    |
